# Supplementary material for: Conserved biophysical compatibility among the highly variable germline-encoded regions shapes TCR-MHC interactions
Source: eLife journal article supplement (doi:10.7554/elife.90681), 2023-10-20

# A Organisms Included from IMGT

| Species               | Common Name             |
|-----------------------|-------------------------|
| <i>Bos taurus</i>     | Cow                     |
| <i>Capra hircus</i>   | Goat                    |
| <i>Aotus nancymae</i> | Nancy Ma's Night Monkey |
| <i>Mus musculus</i>   | Mouse                   |
| <i>Macaca mulatta</i> | Rhesus macaque          |
| <i>Ovis aries</i>     | Sheep                   |
| <i>Homo sapiens</i>   | Human                   |

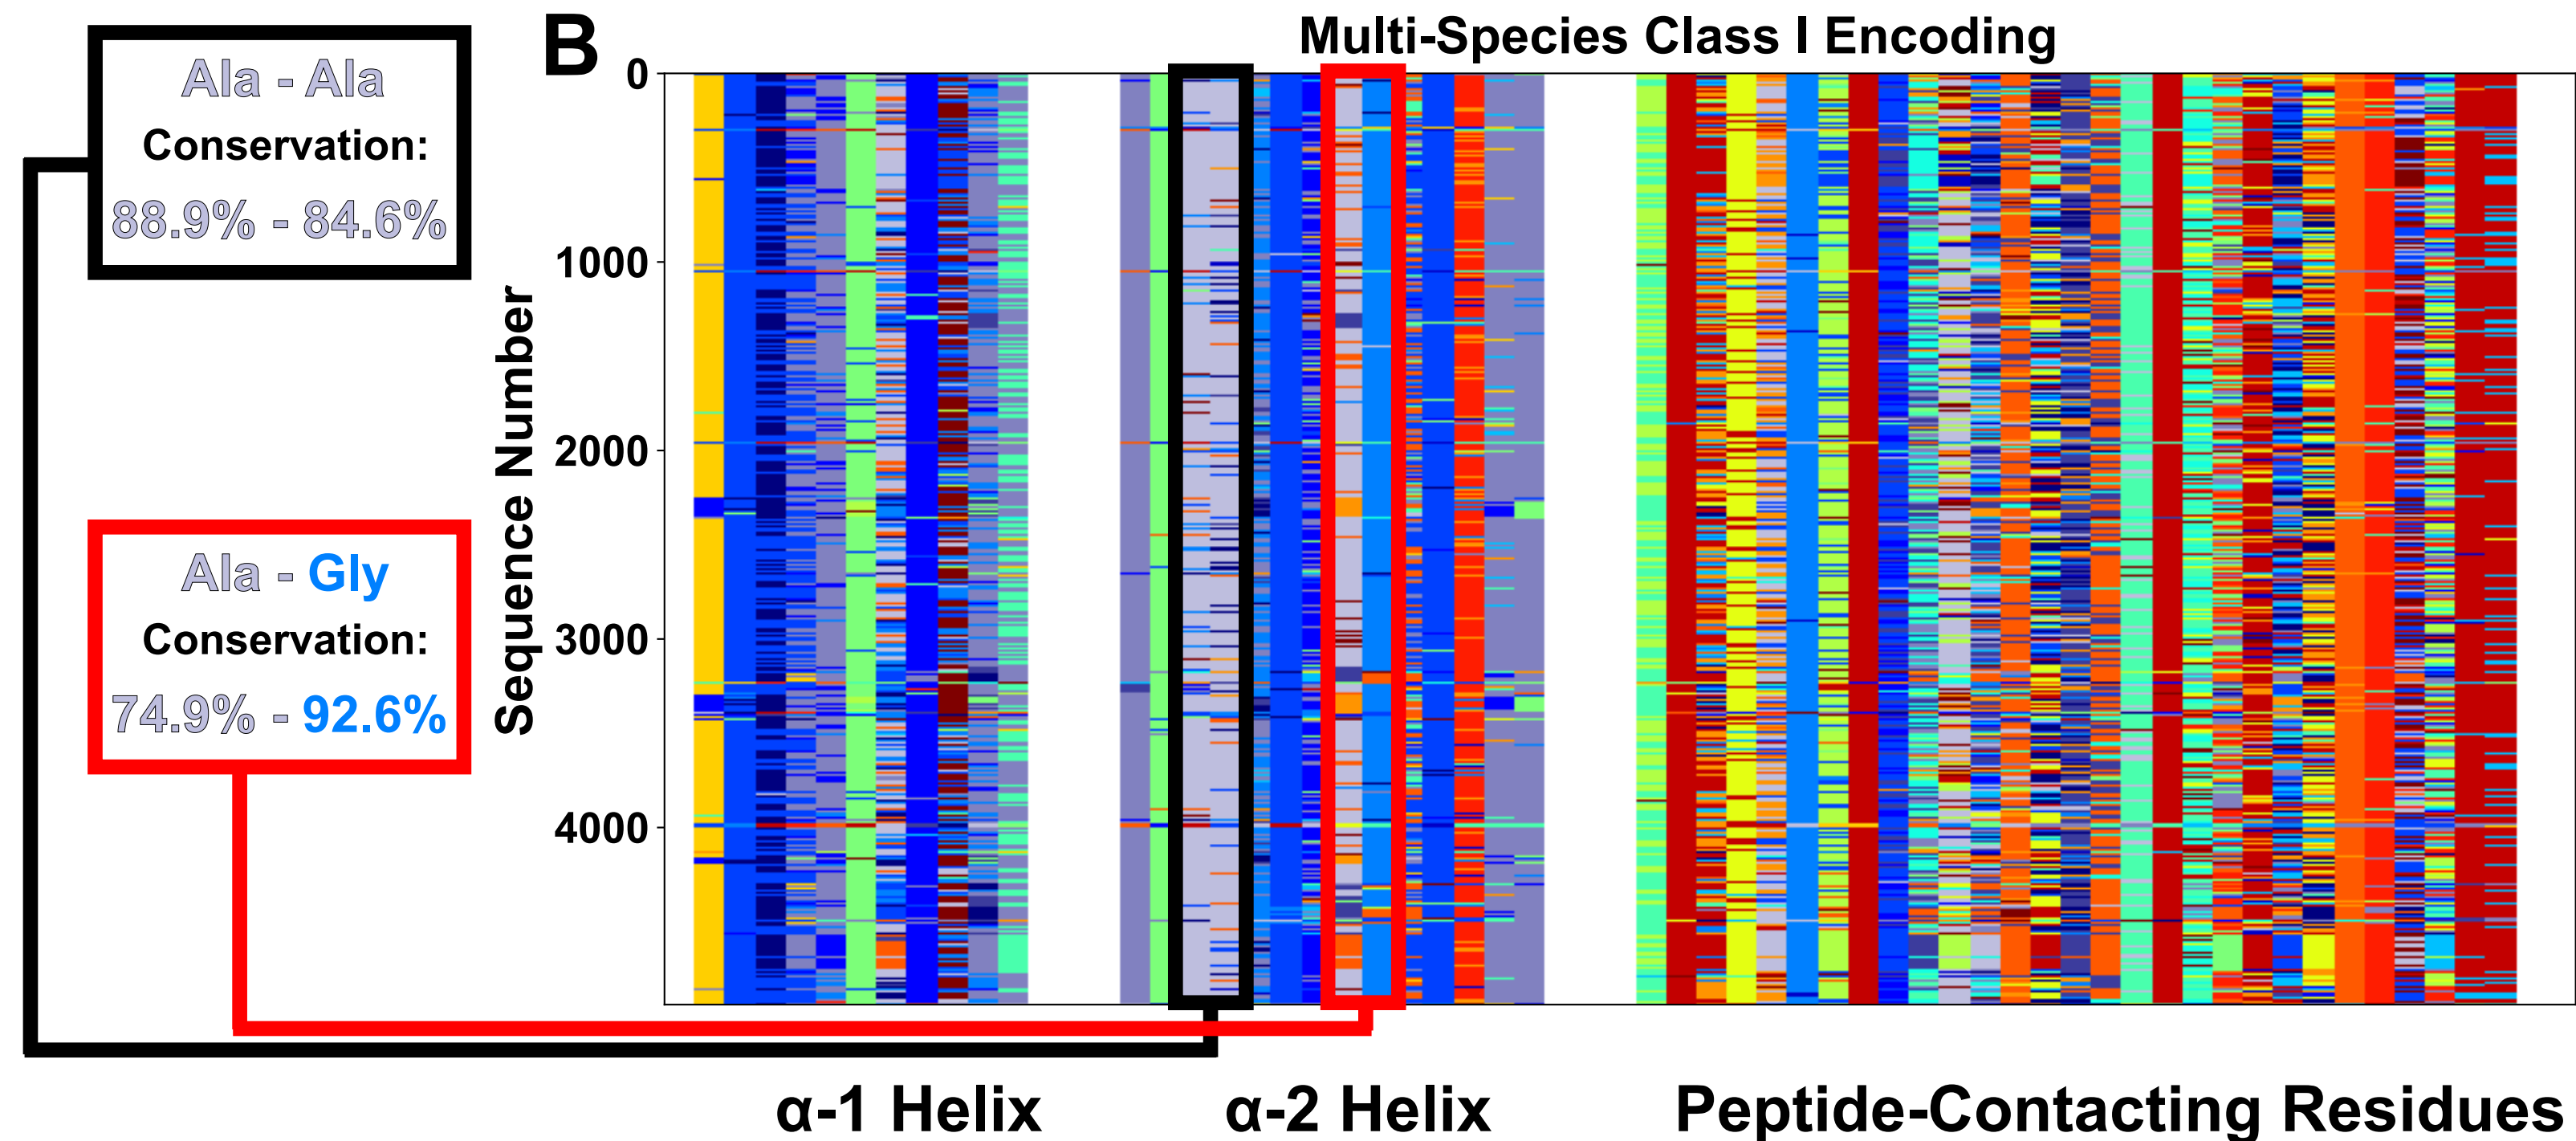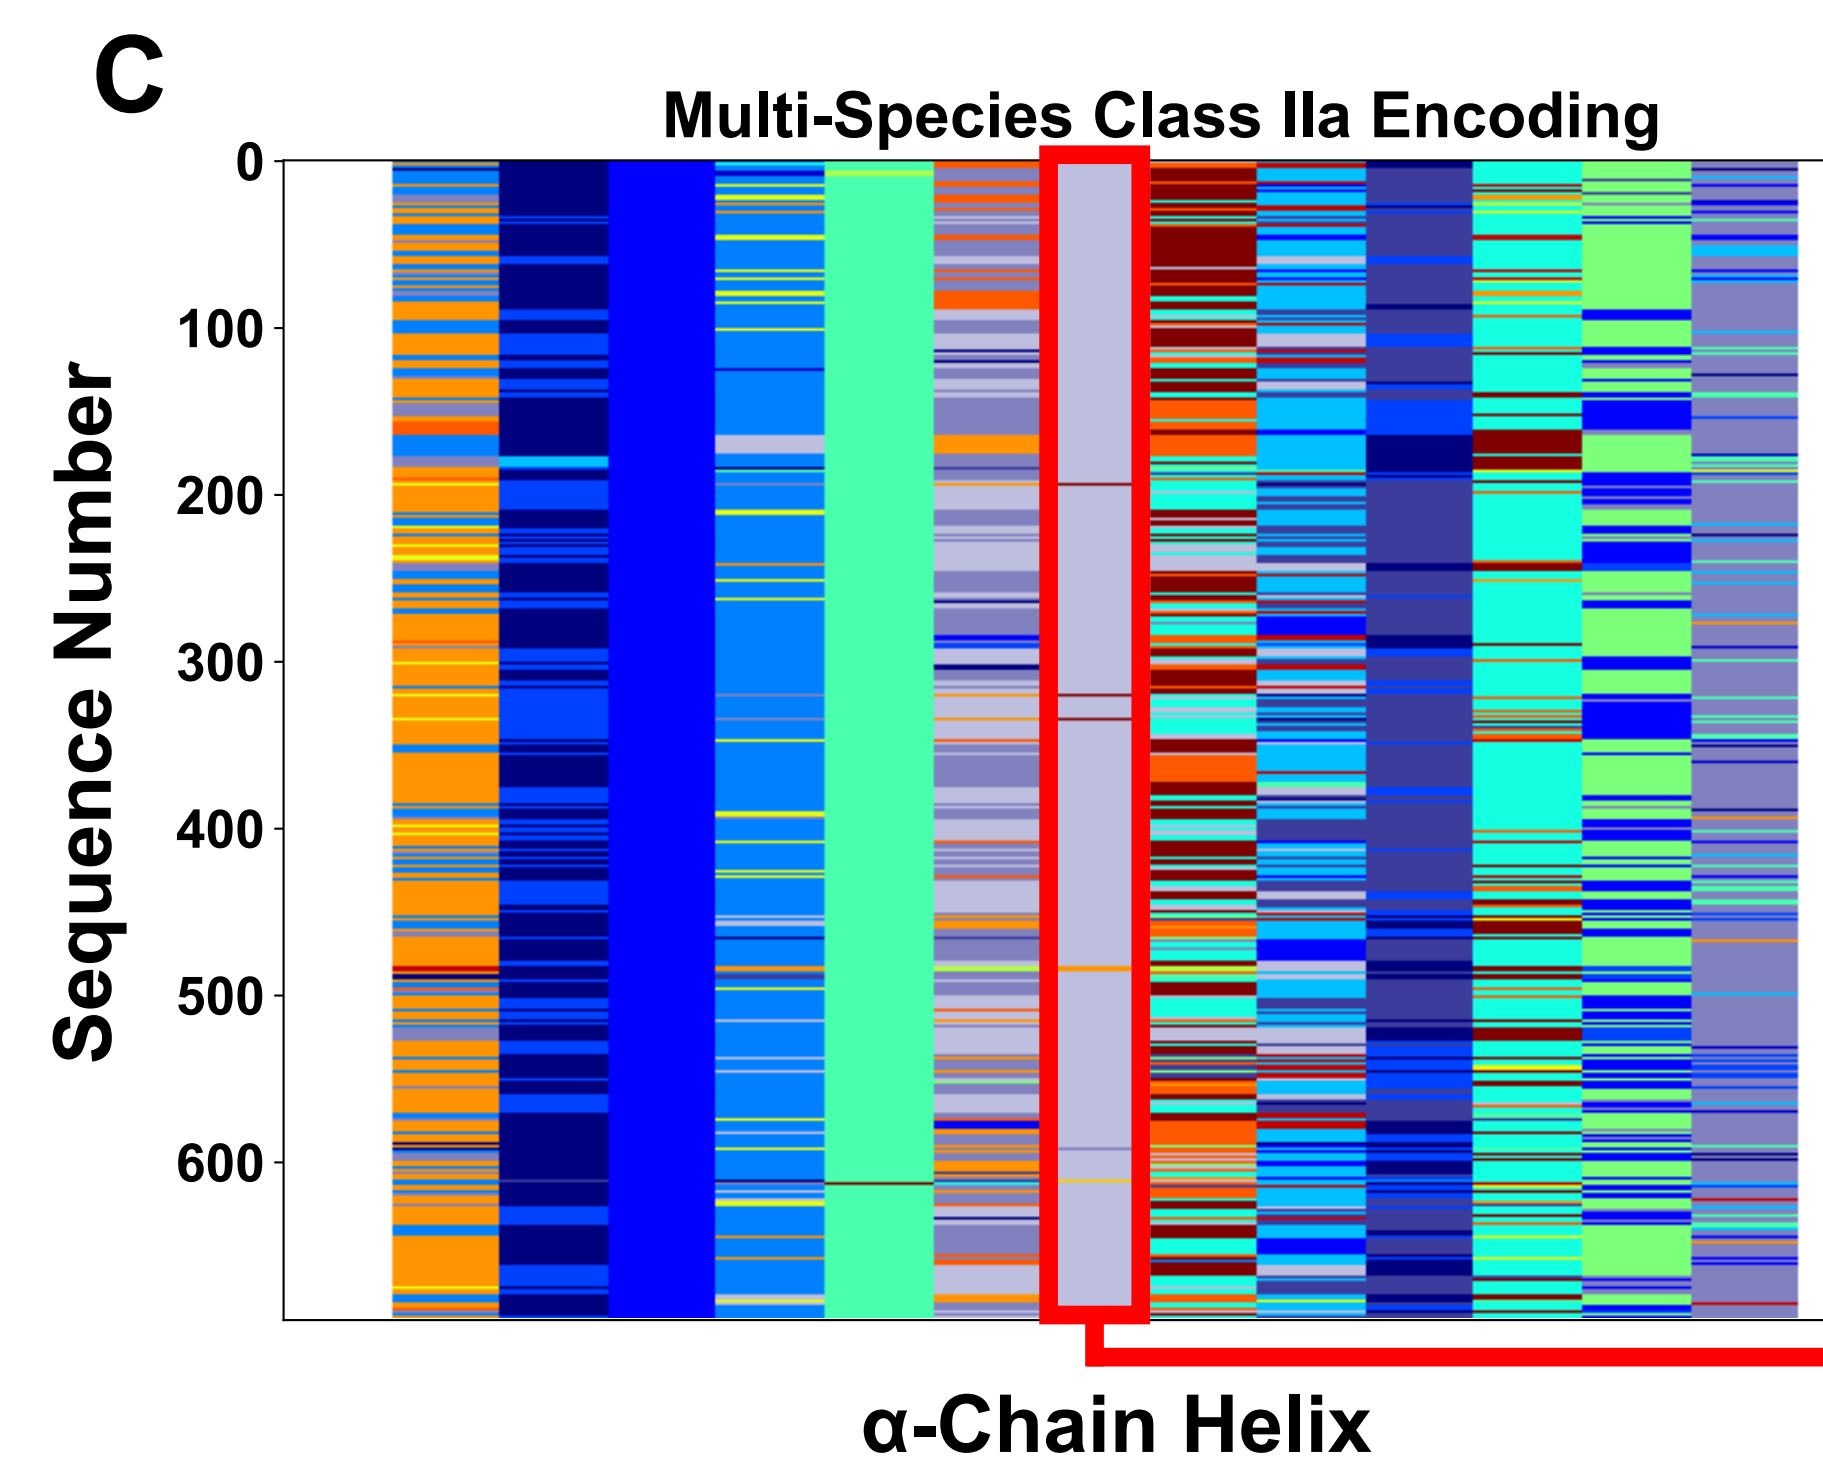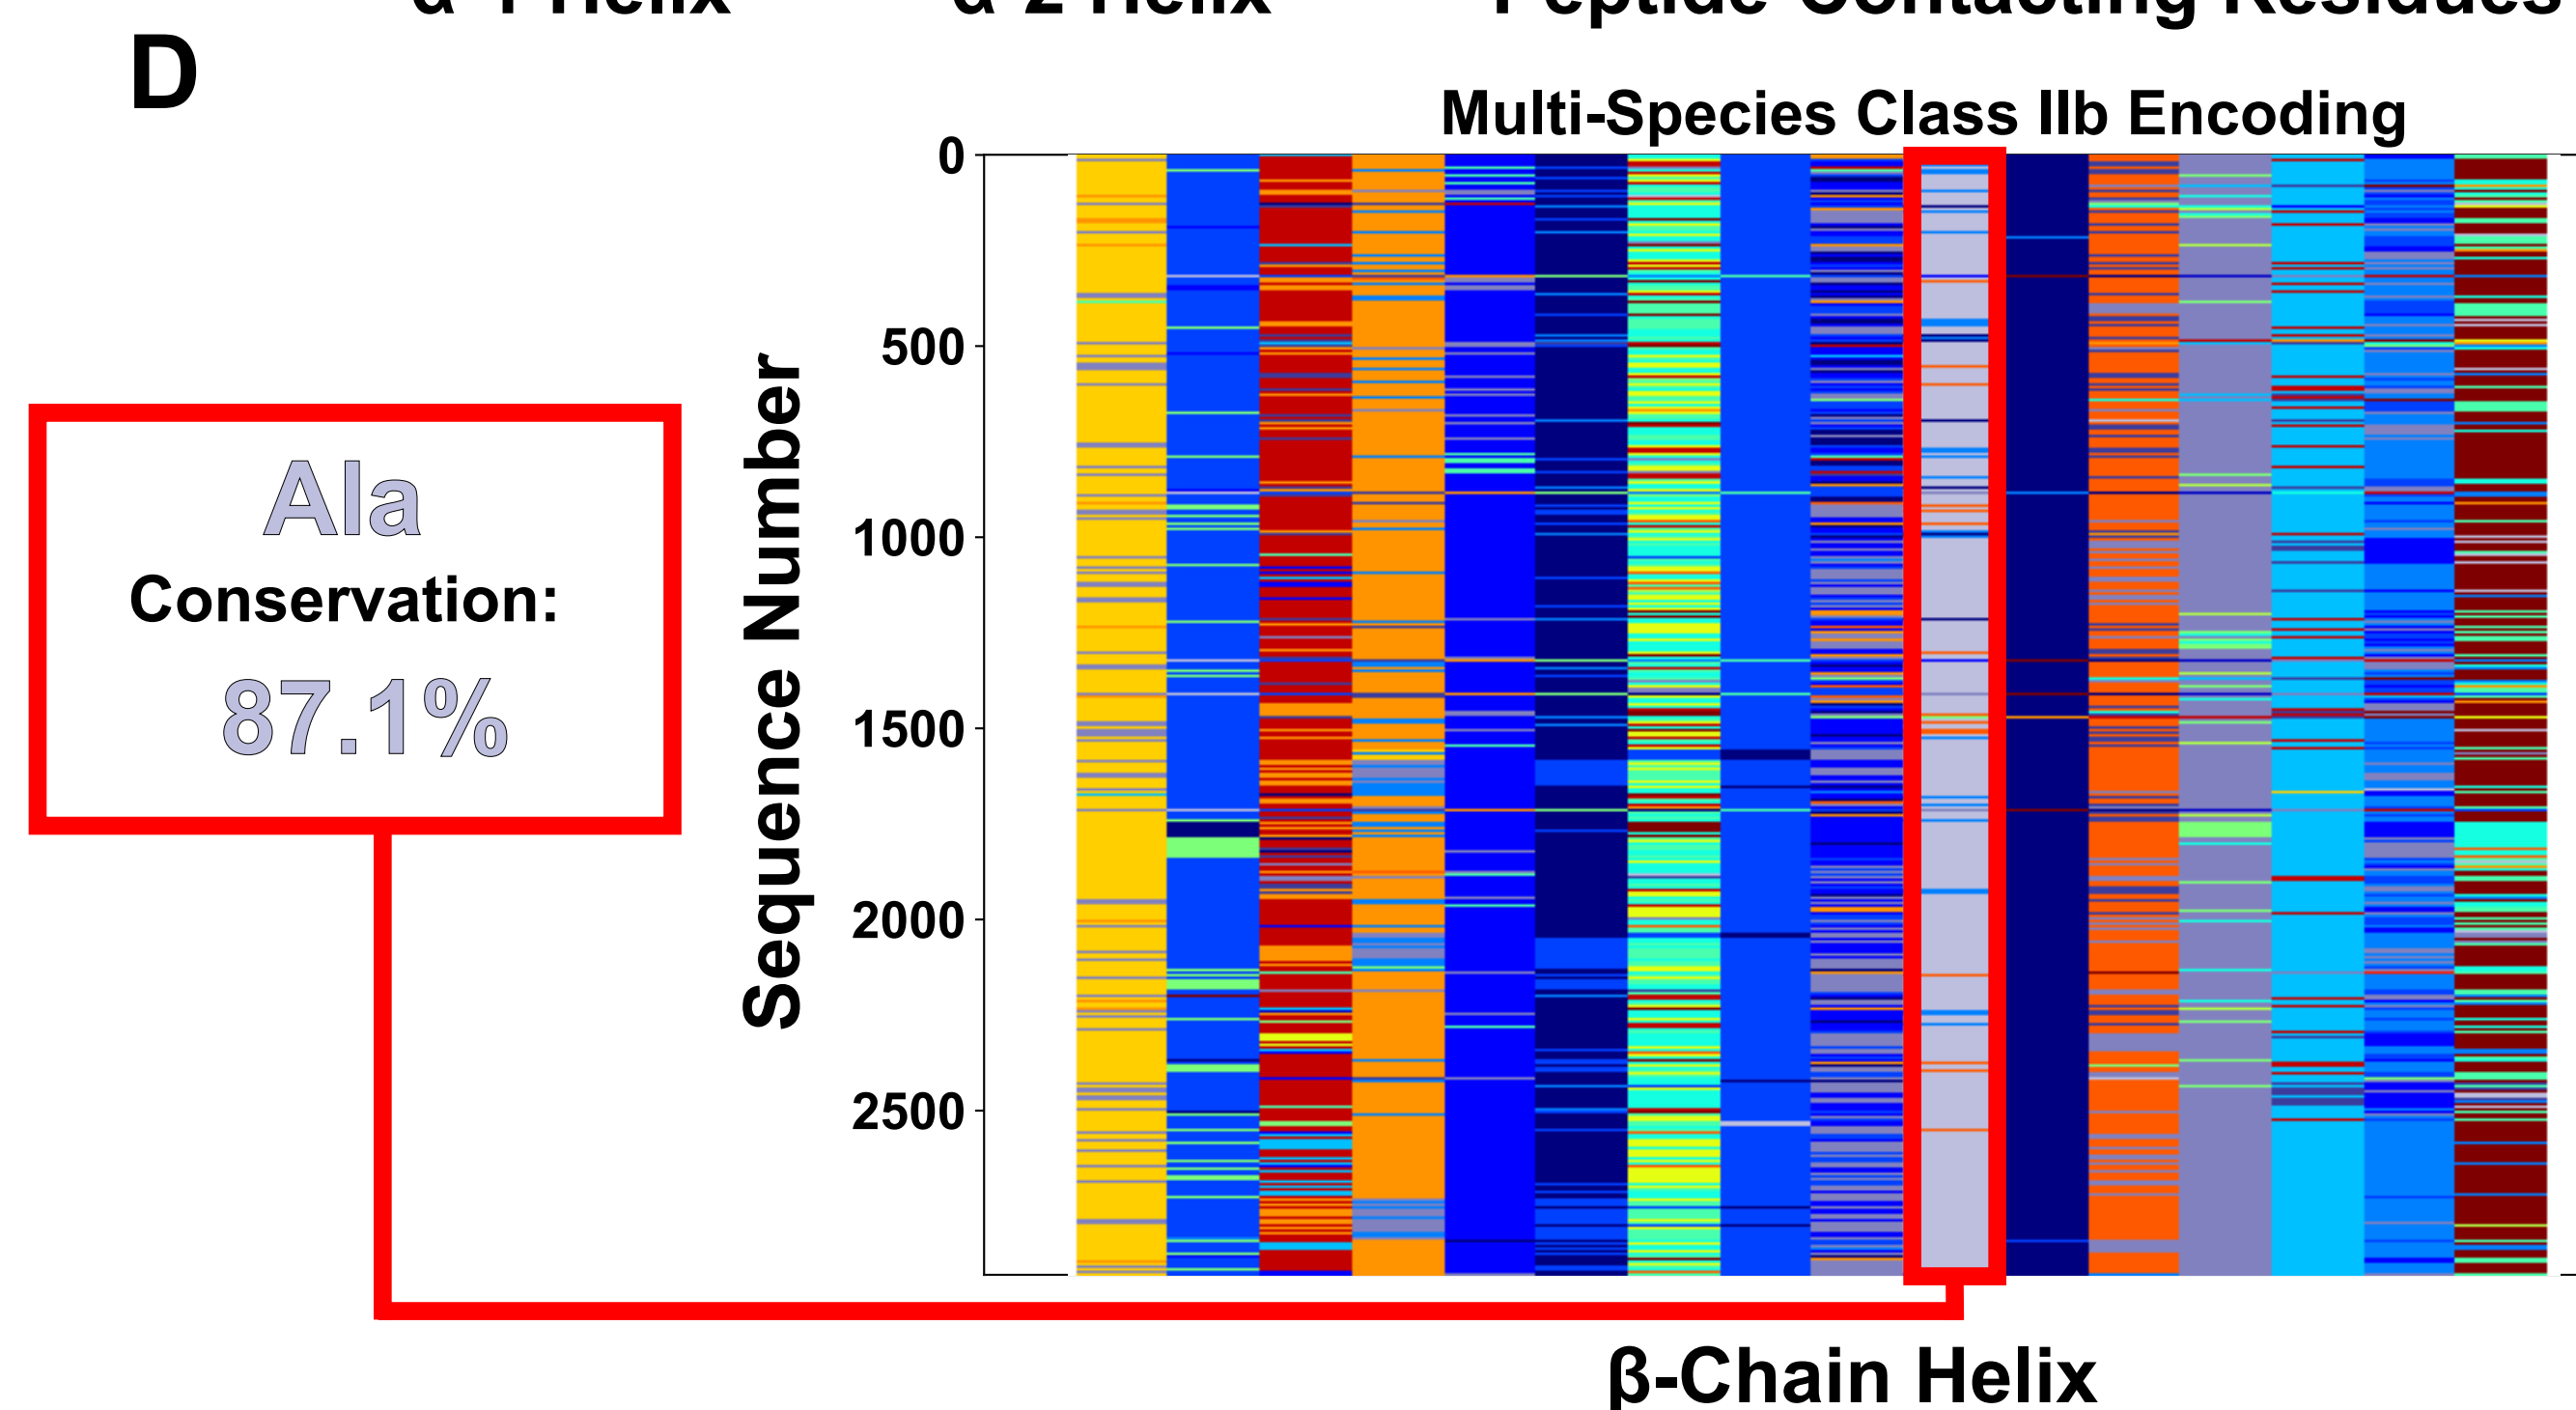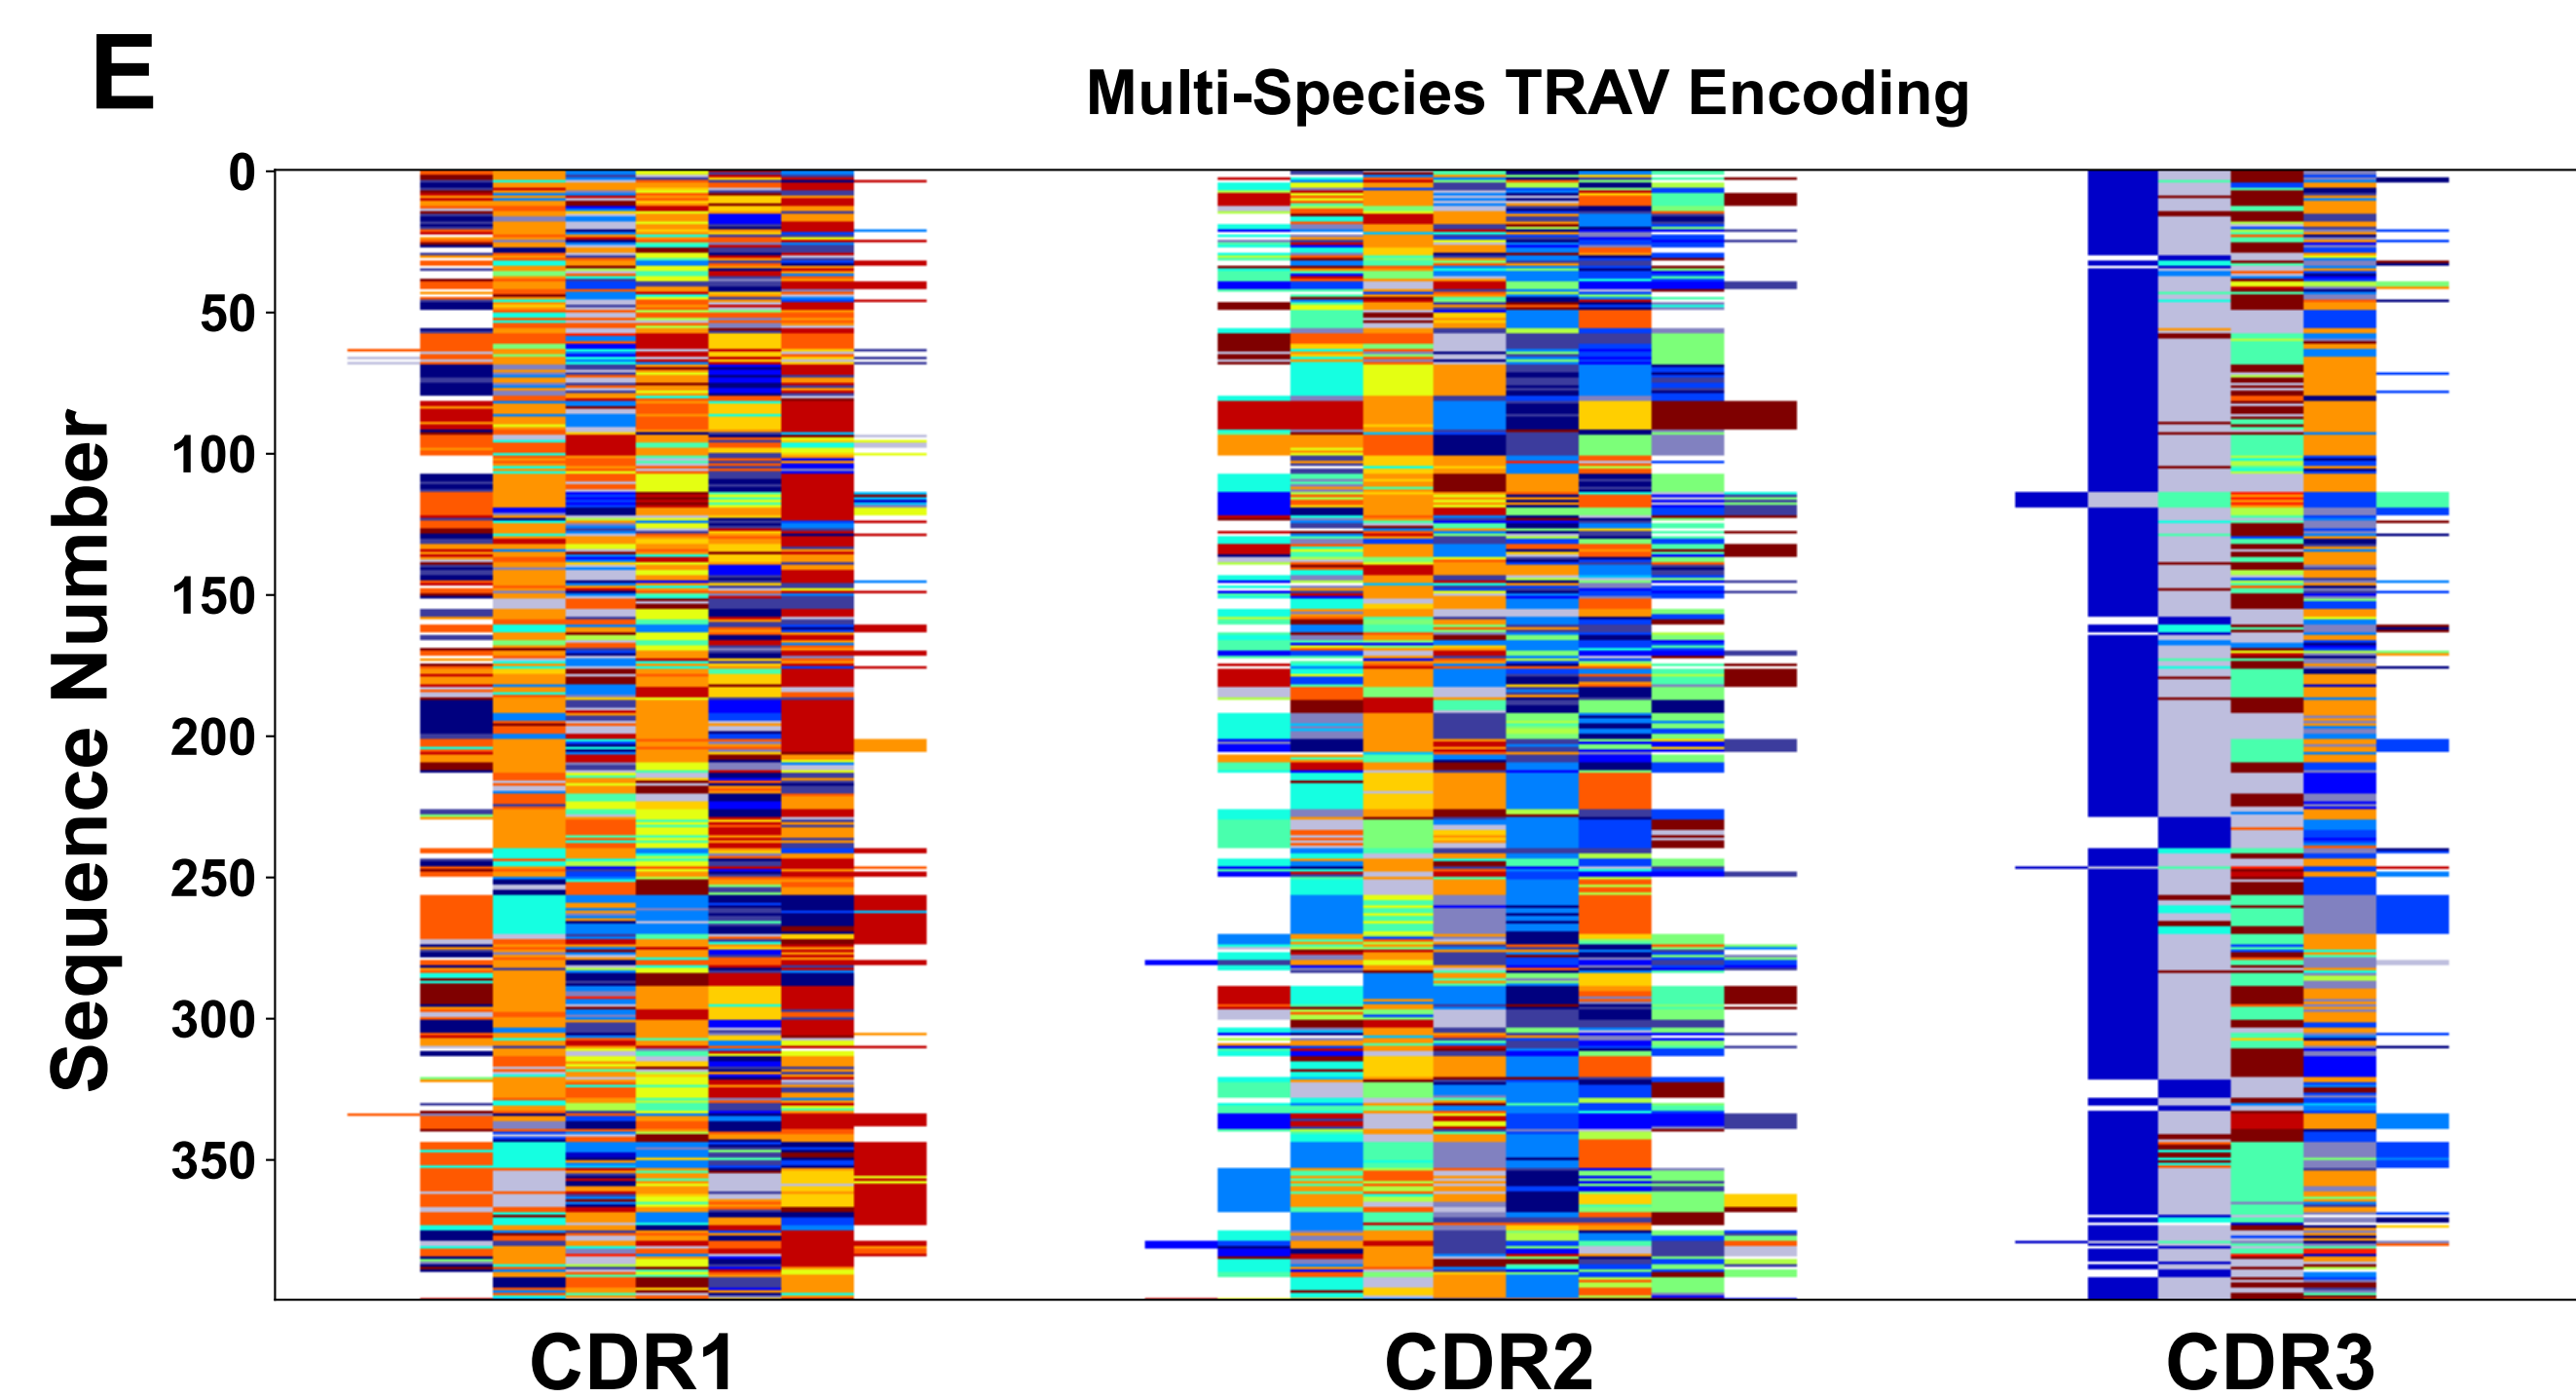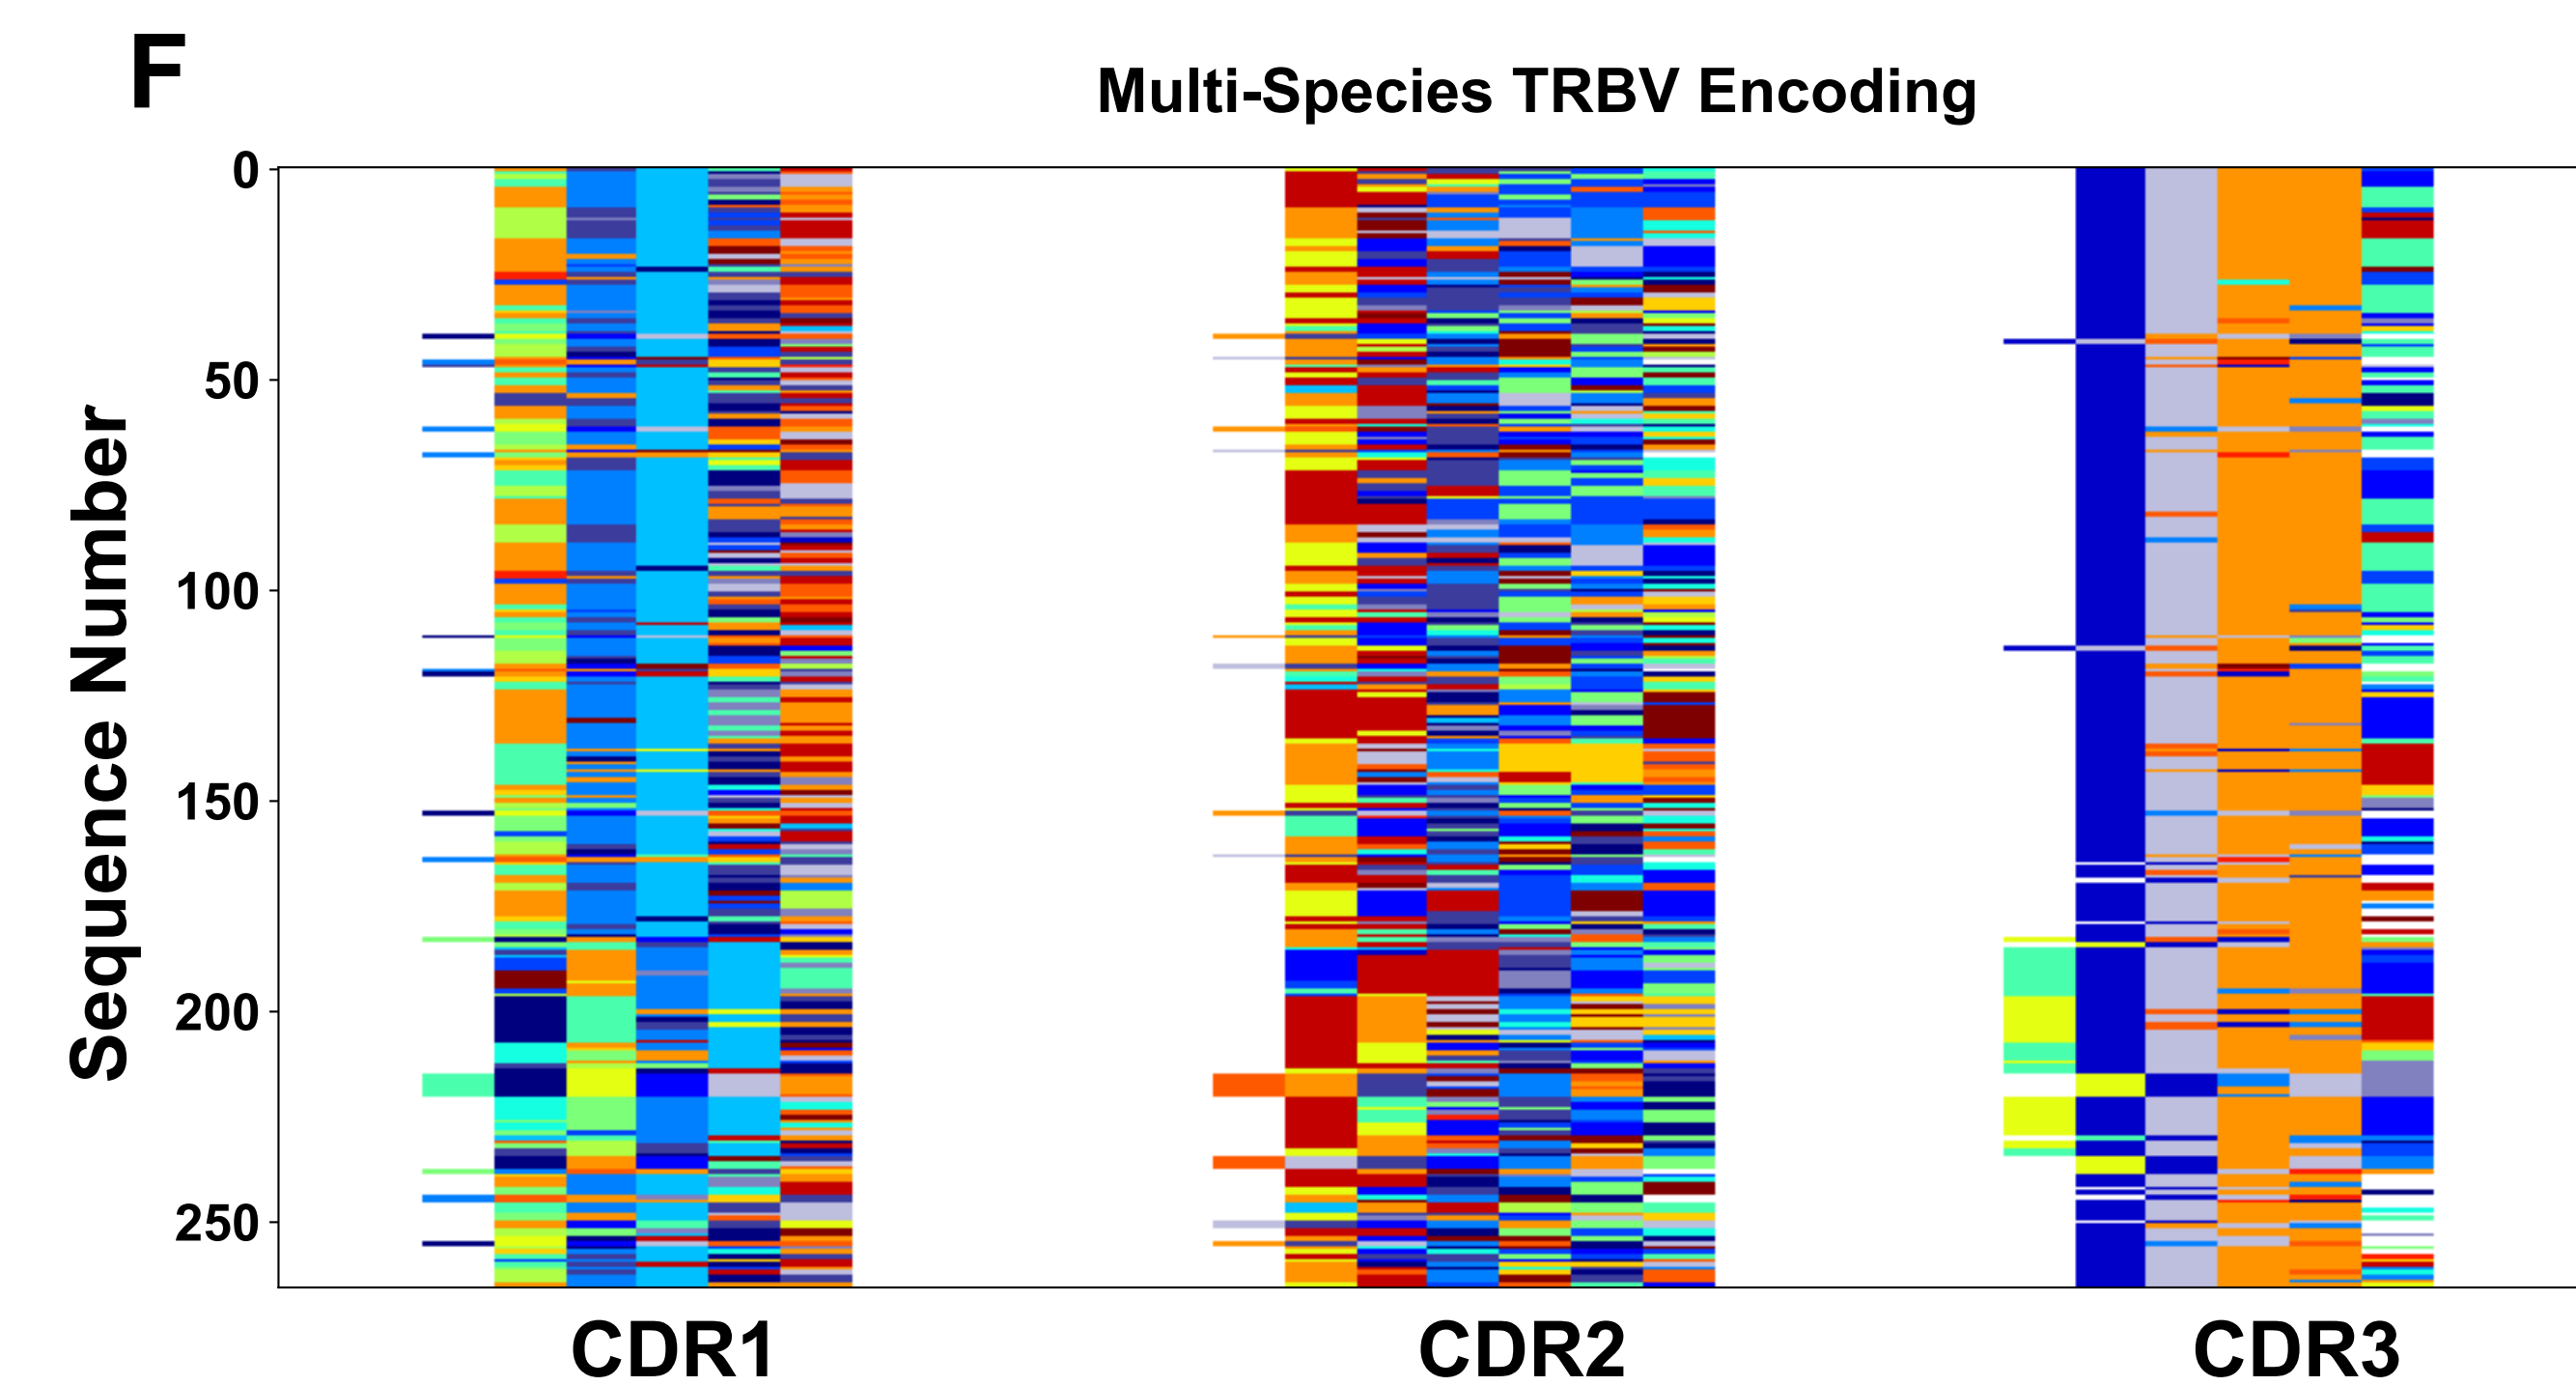

Supplement: supp [file elife-90681-supp-v1.zip]
