# Supplementary material for: Conserved biophysical compatibility among the highly variable germline-encoded regions shapes TCR-MHC interactions
Source: eLife journal article supplement (doi:10.7554/elife.90681), 2023-10-20

AIMS Interaction Potential V2

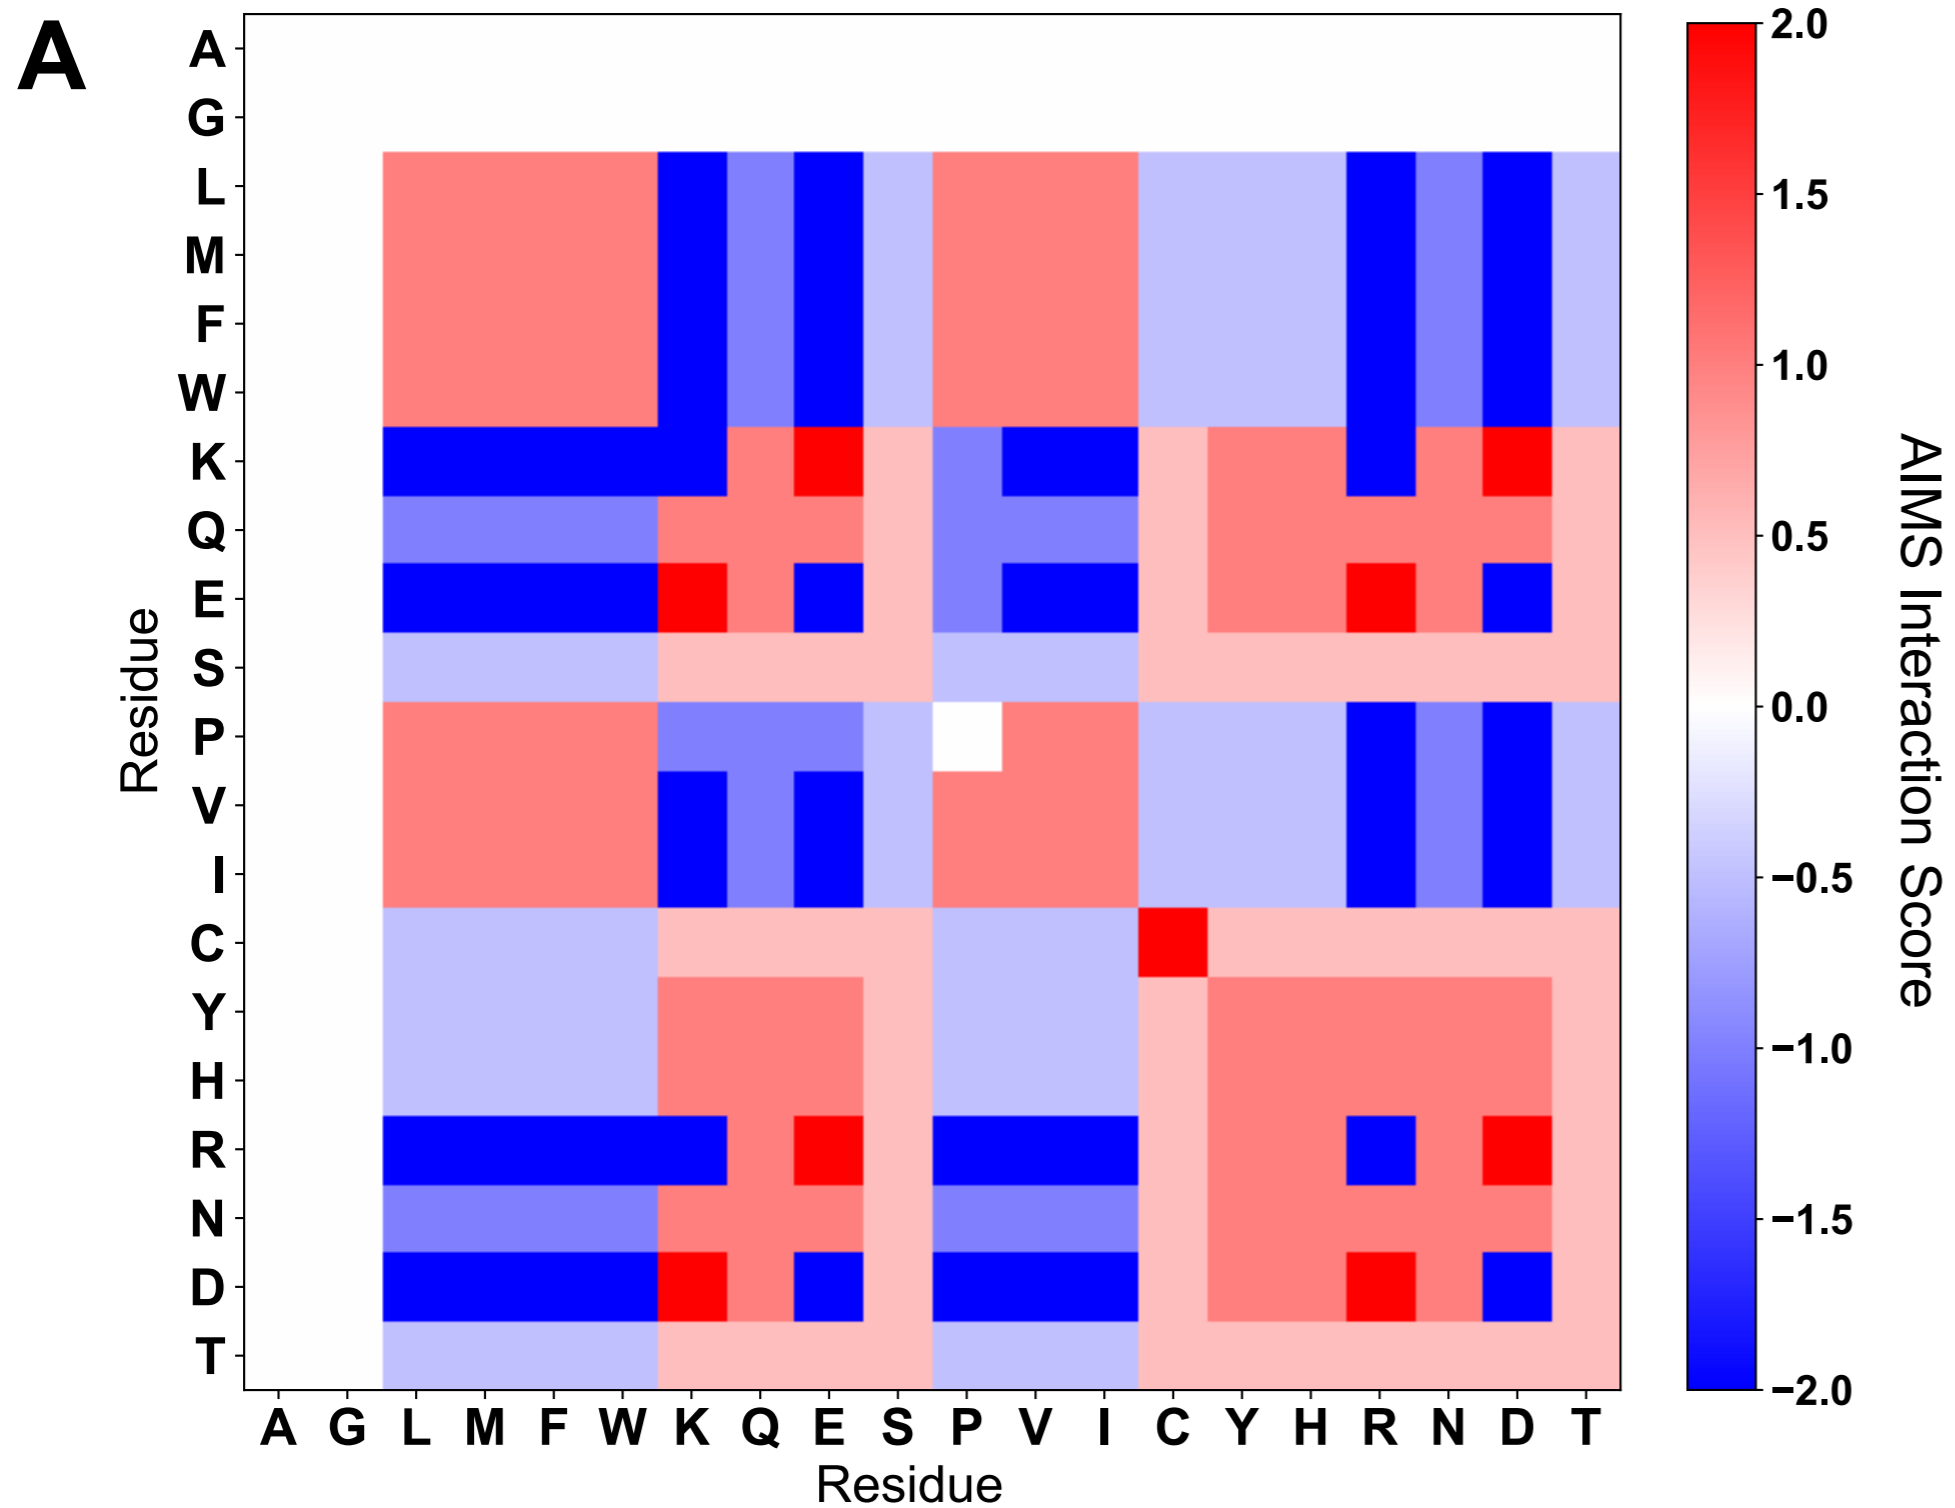

Non-Normalized SC-SC Interactions

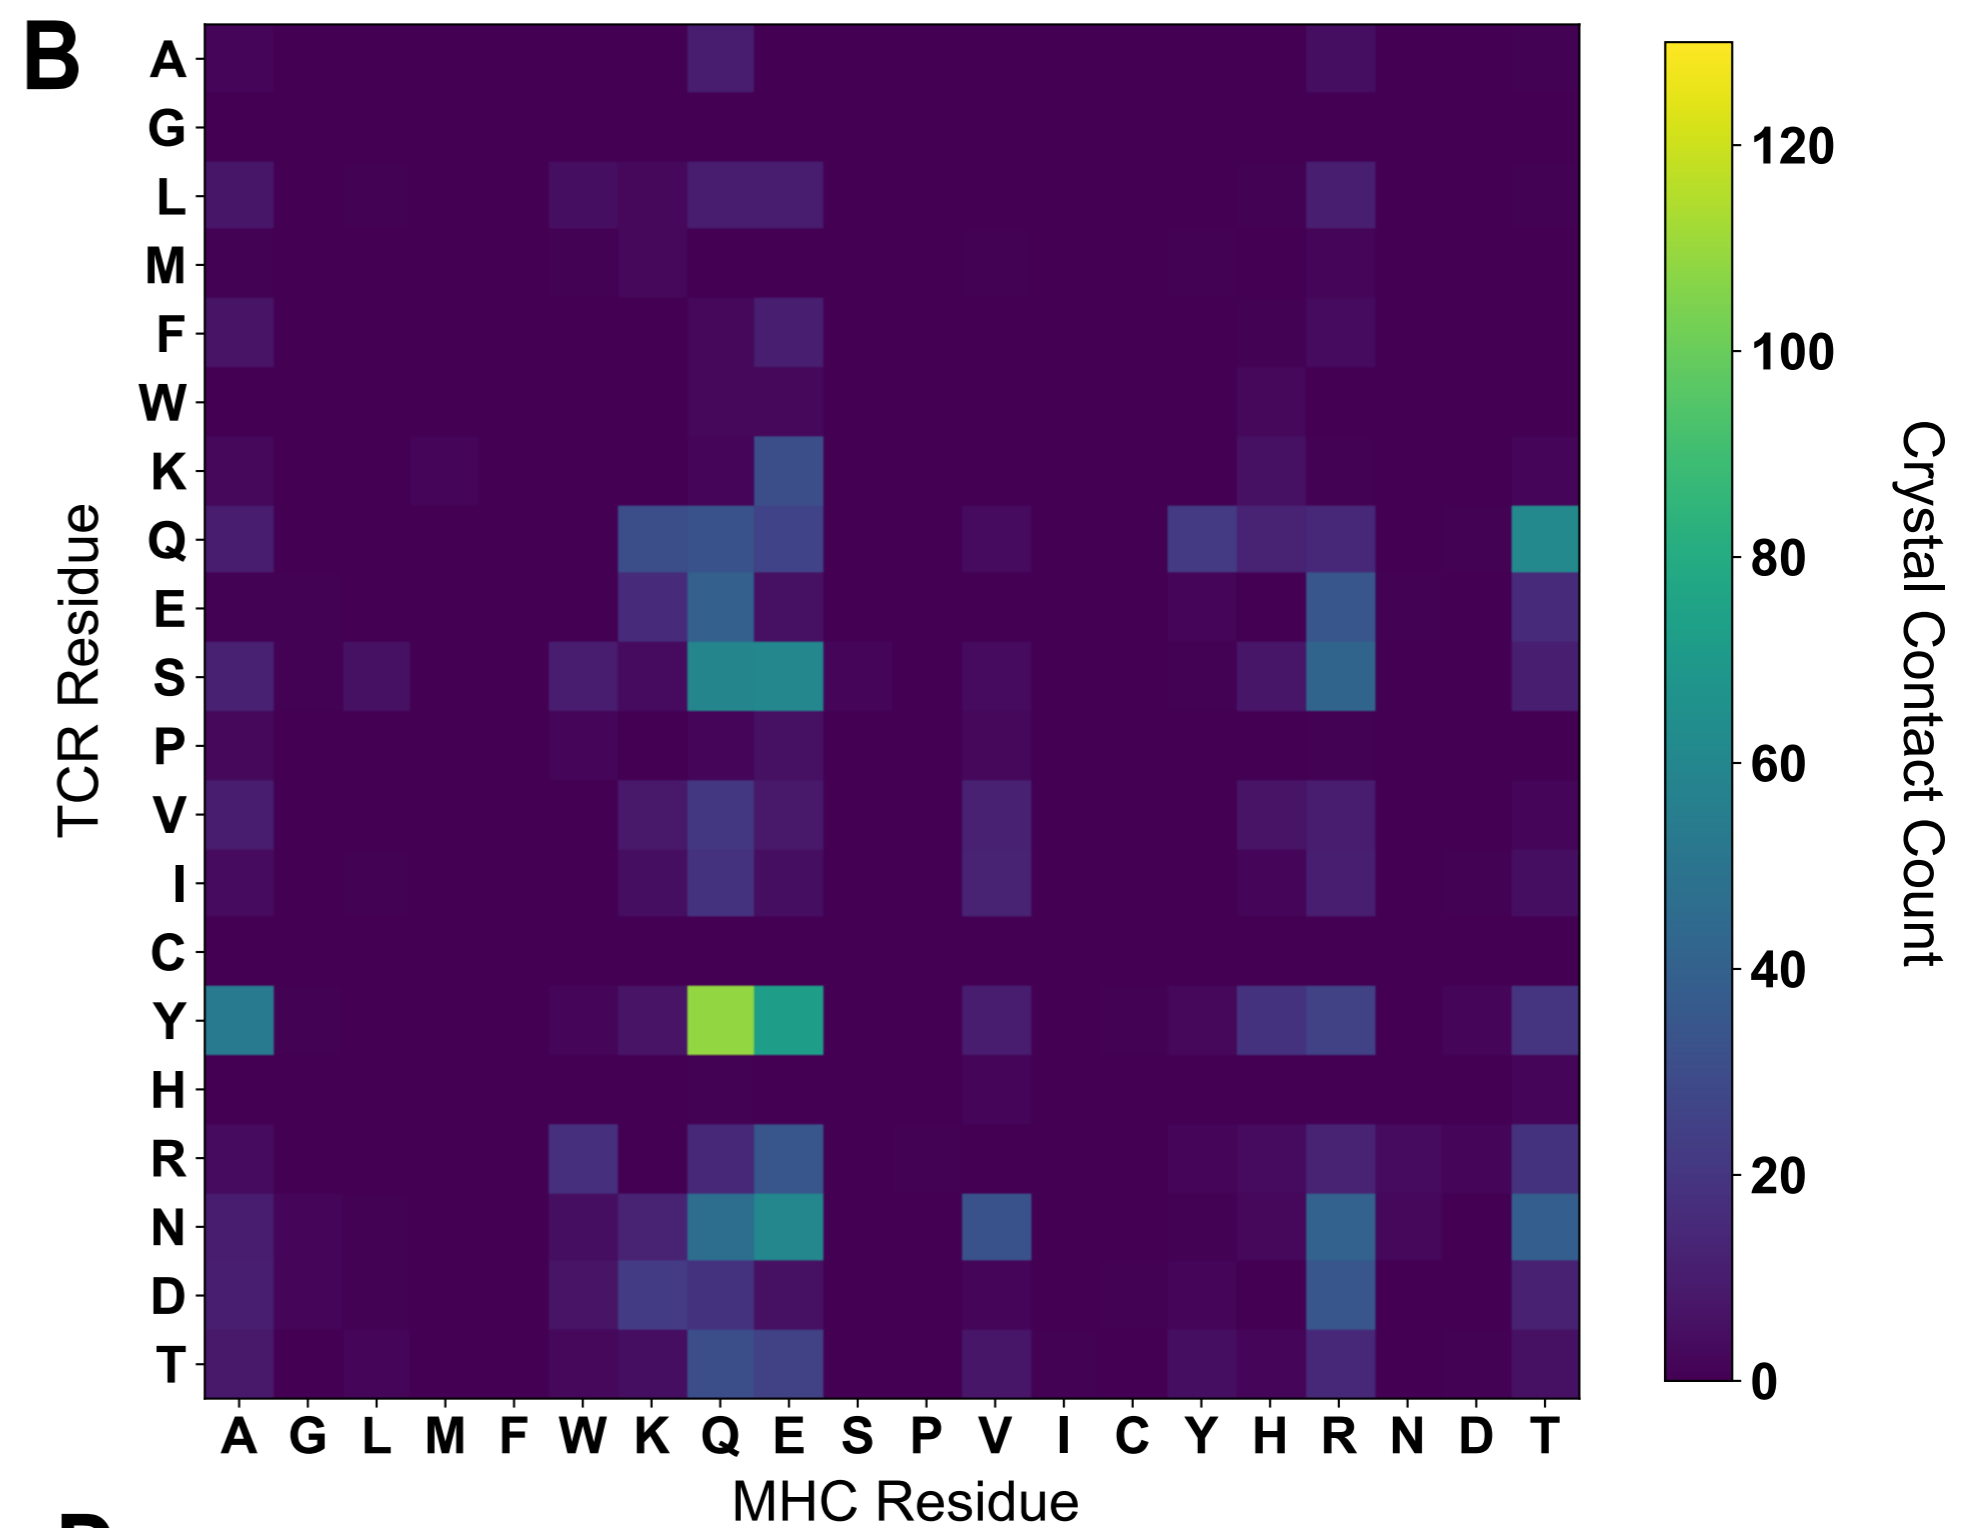**C**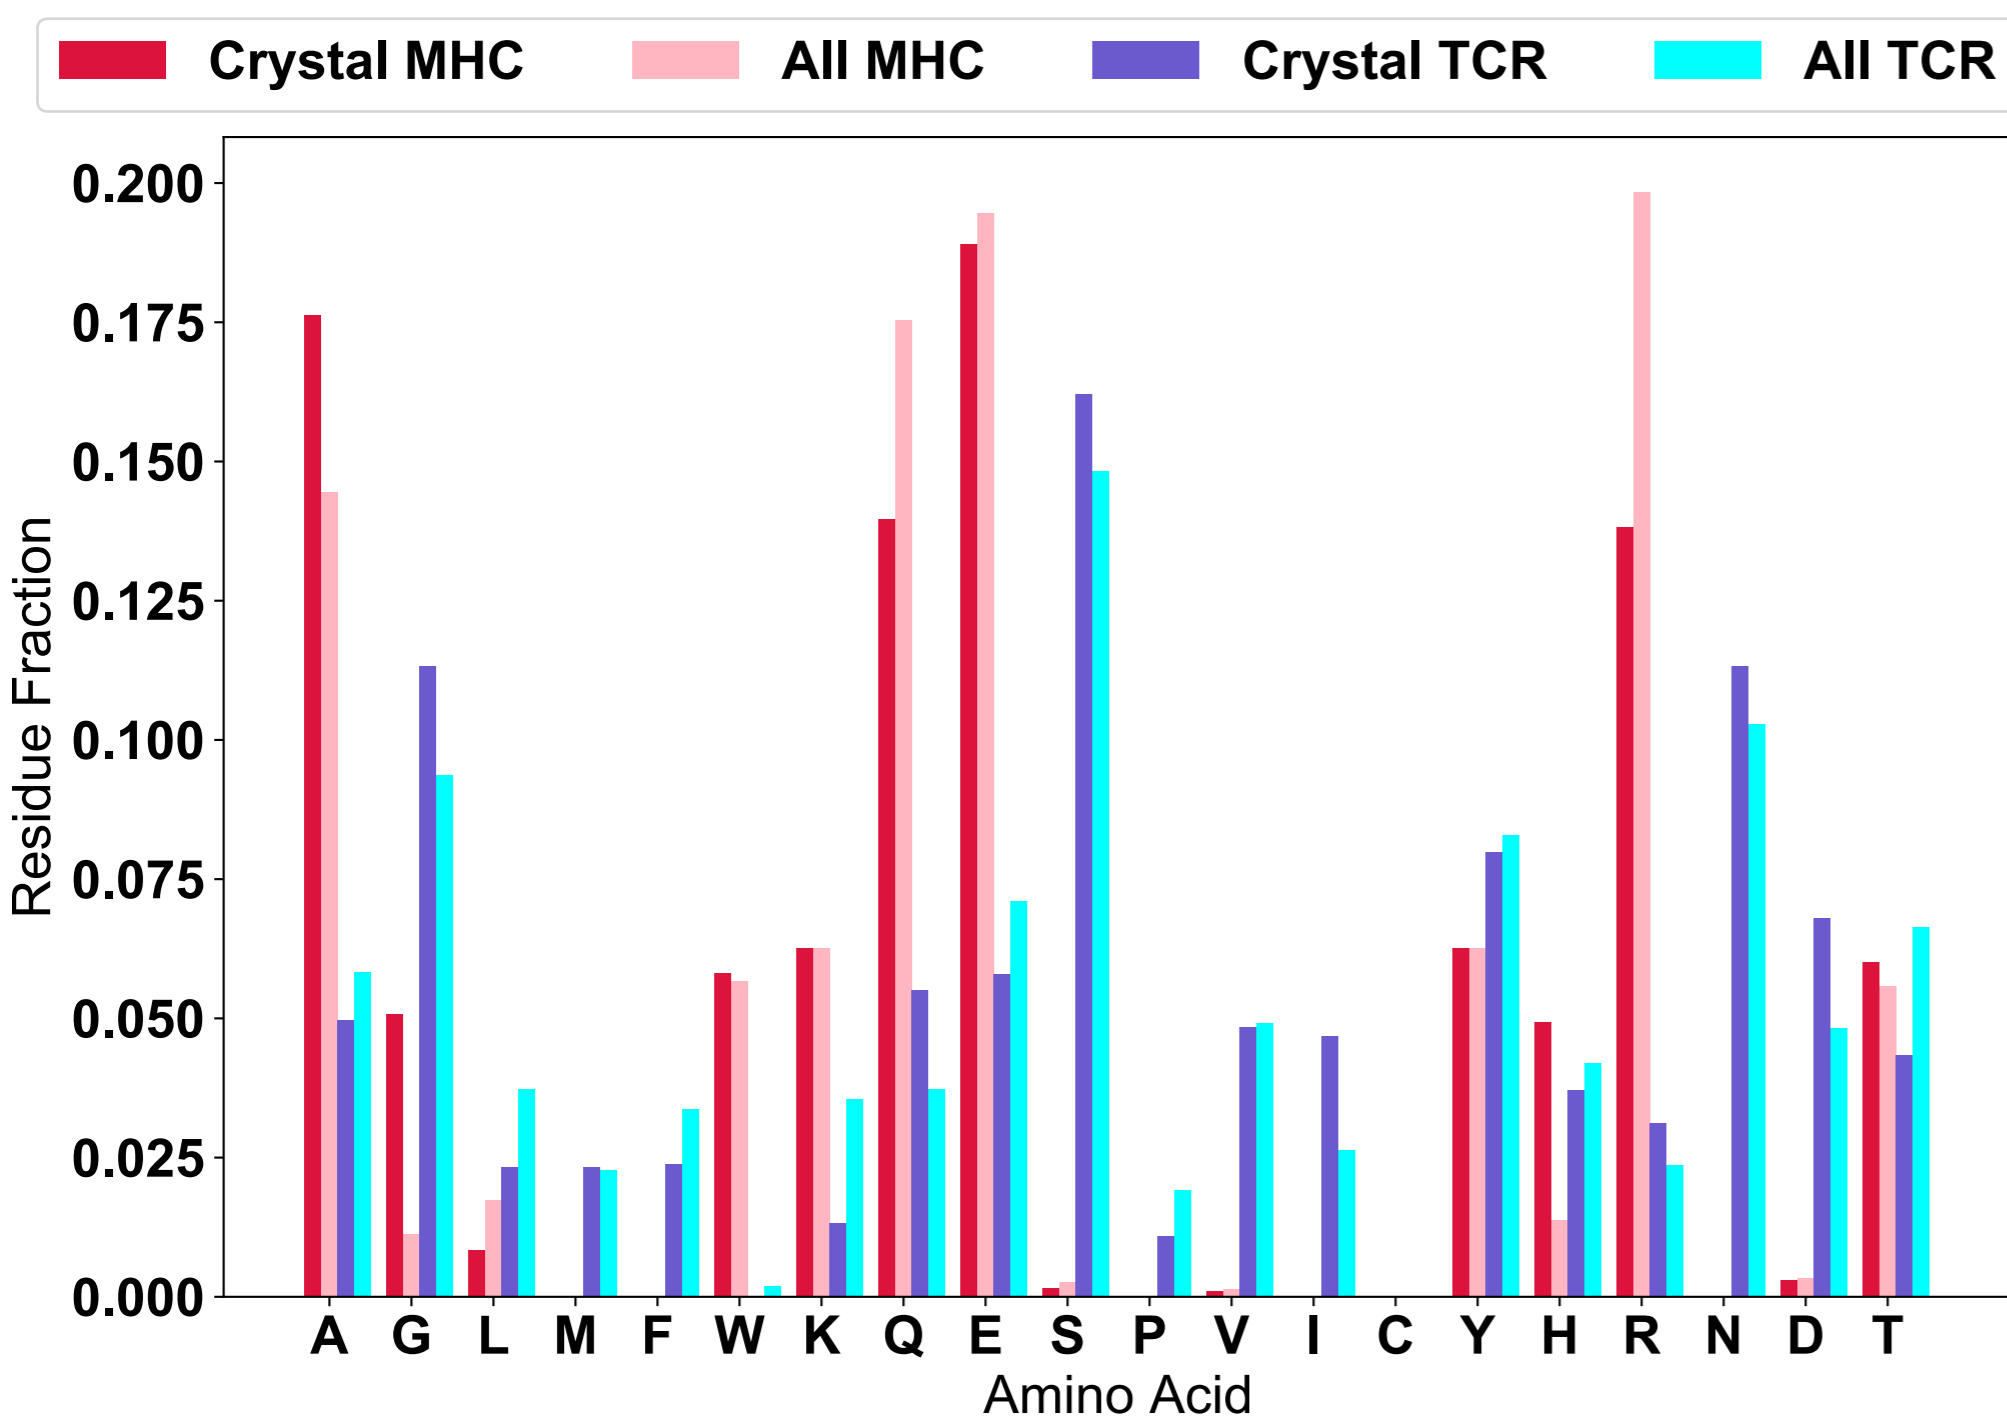**D**

Background Subtracted SC-SC Interactions

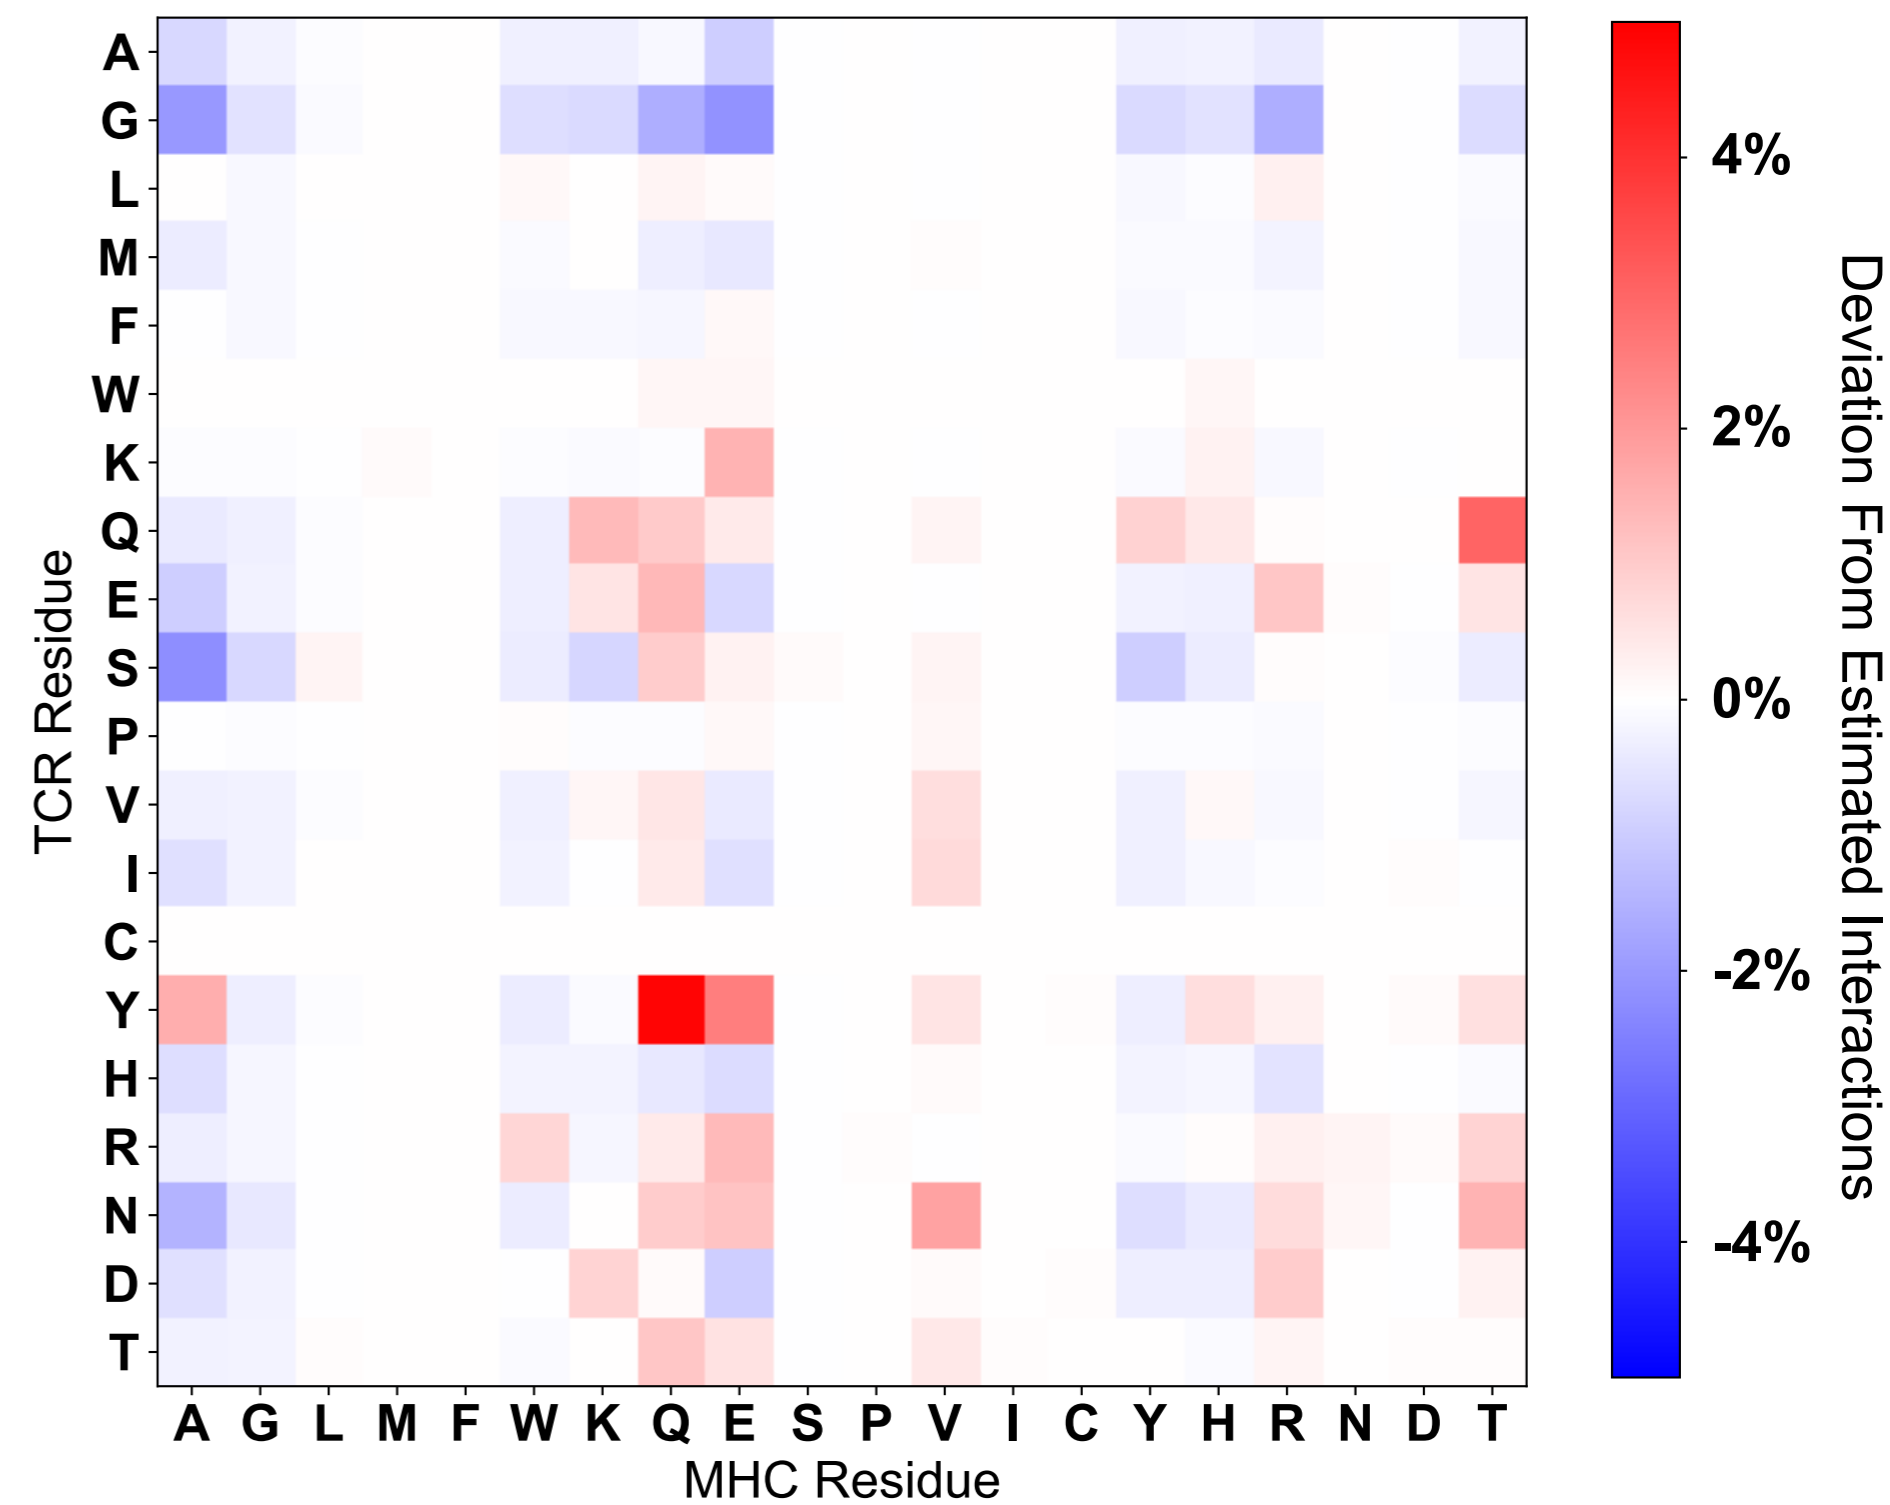

Supplement: supp [file elife-90681-supp-v1.zip]
