# Supplementary figures and images for: Conserved biophysical compatibility among the highly variable germline-encoded regions shapes TCR-MHC interactions
Source: eLife journal article supplement (doi:10.7554/elife.90681), 2023-10-20

**A**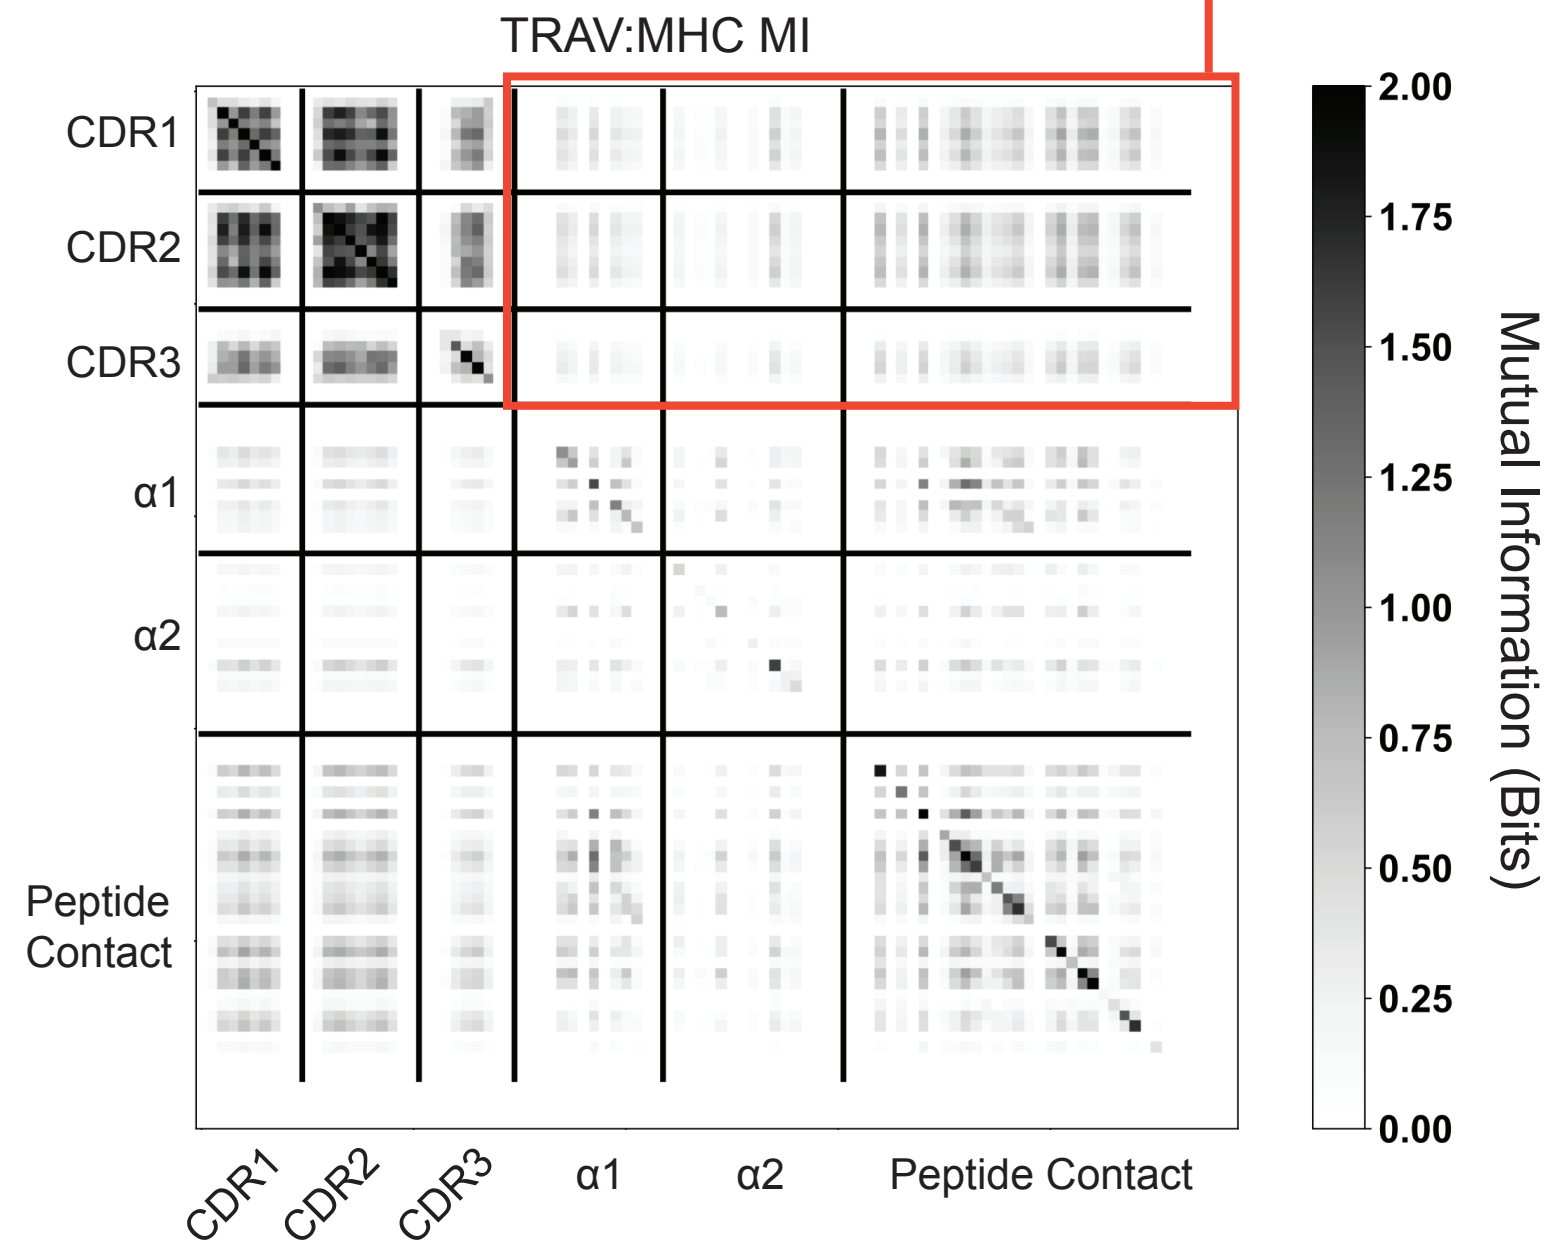**B**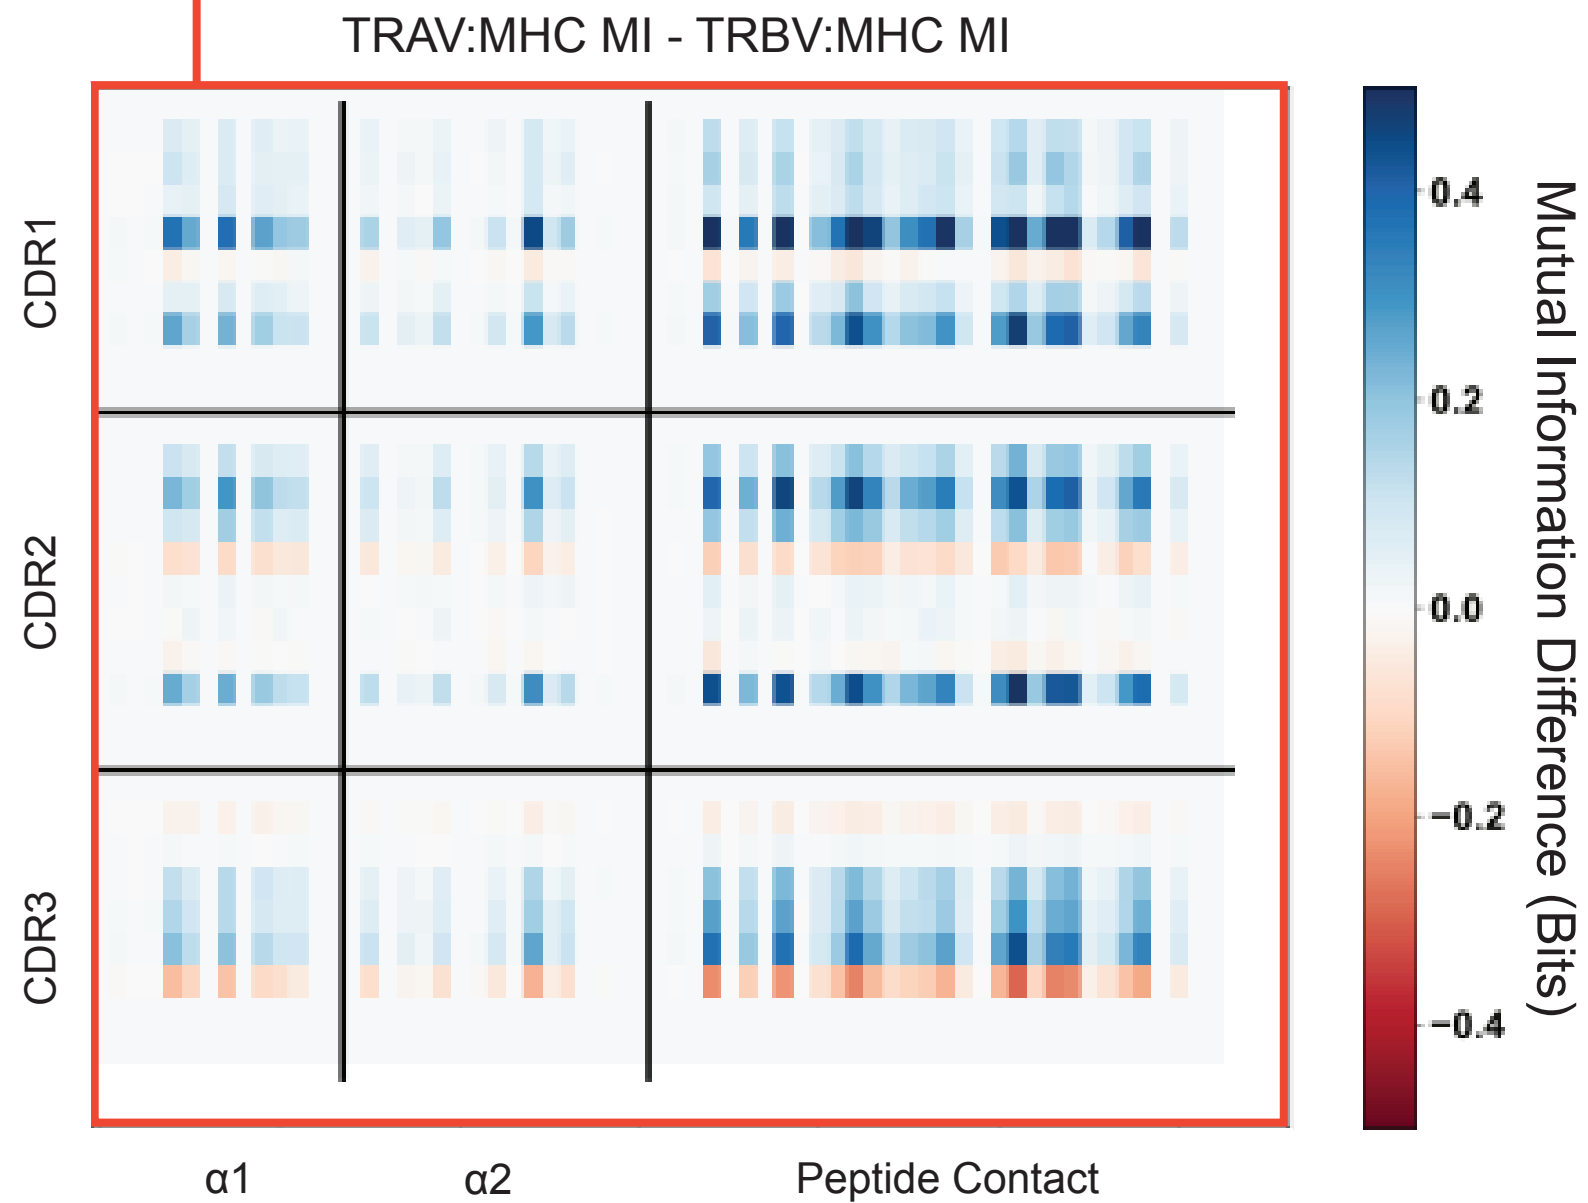

Supplement: supp [file elife-90681-supp-v1.zip]

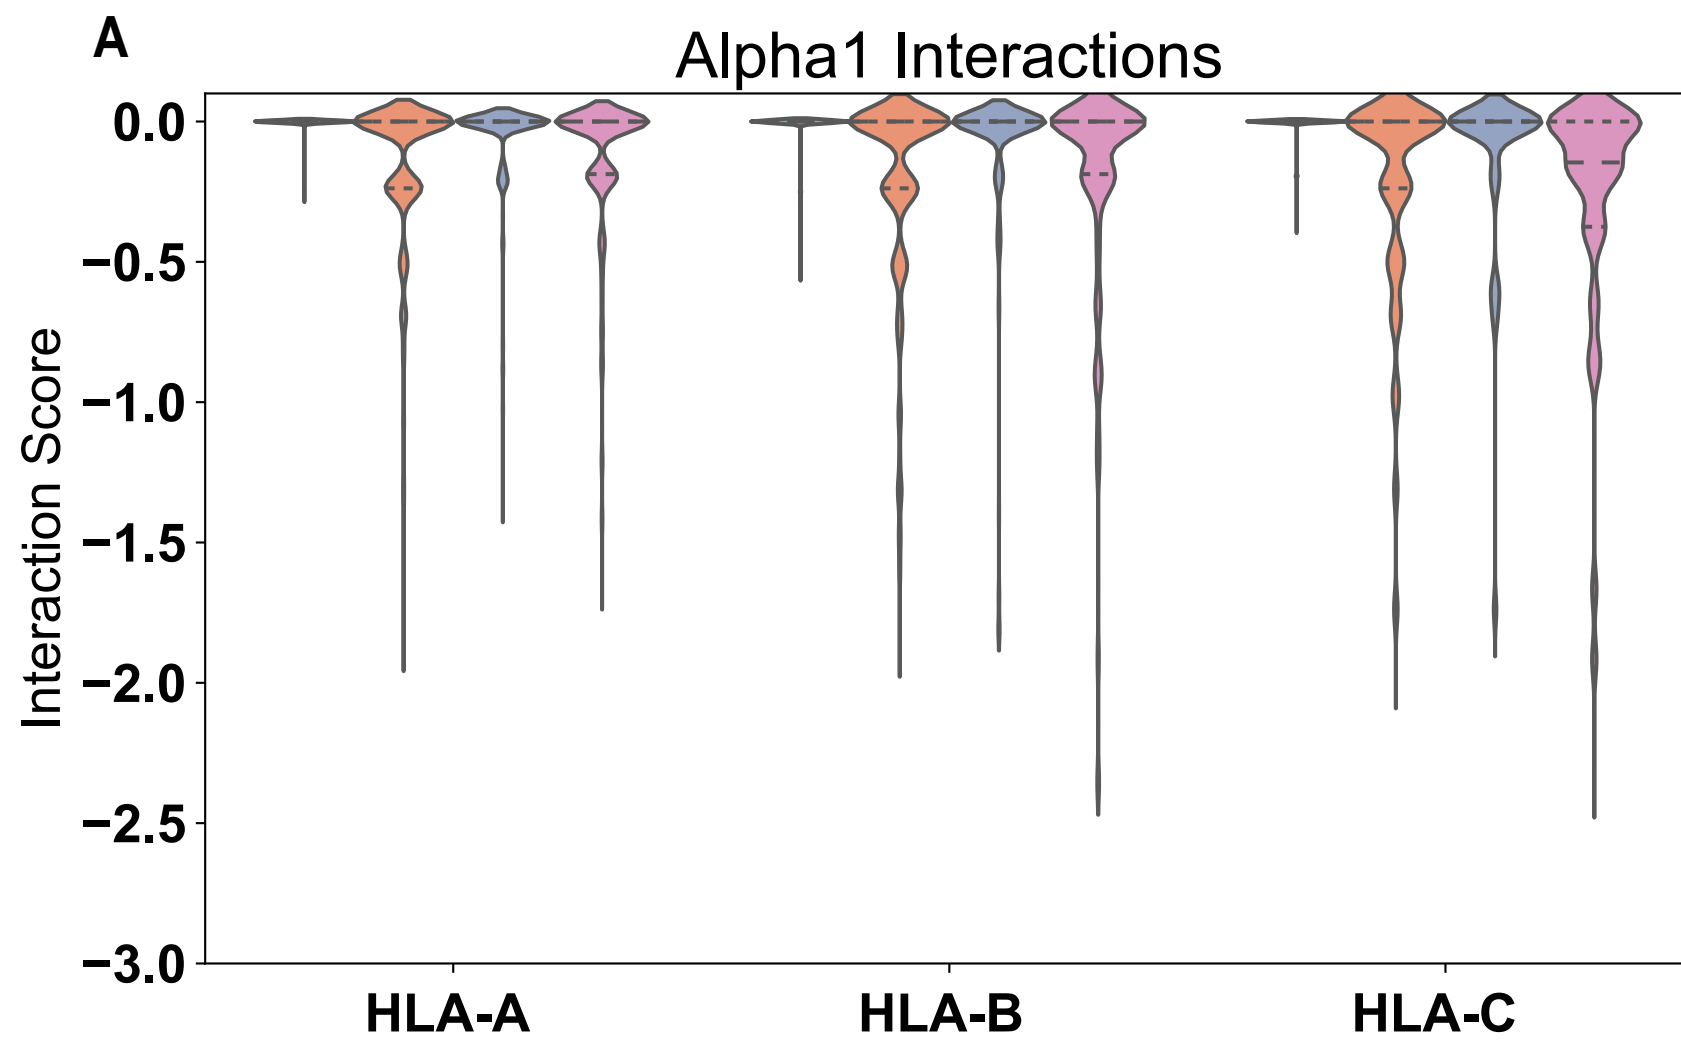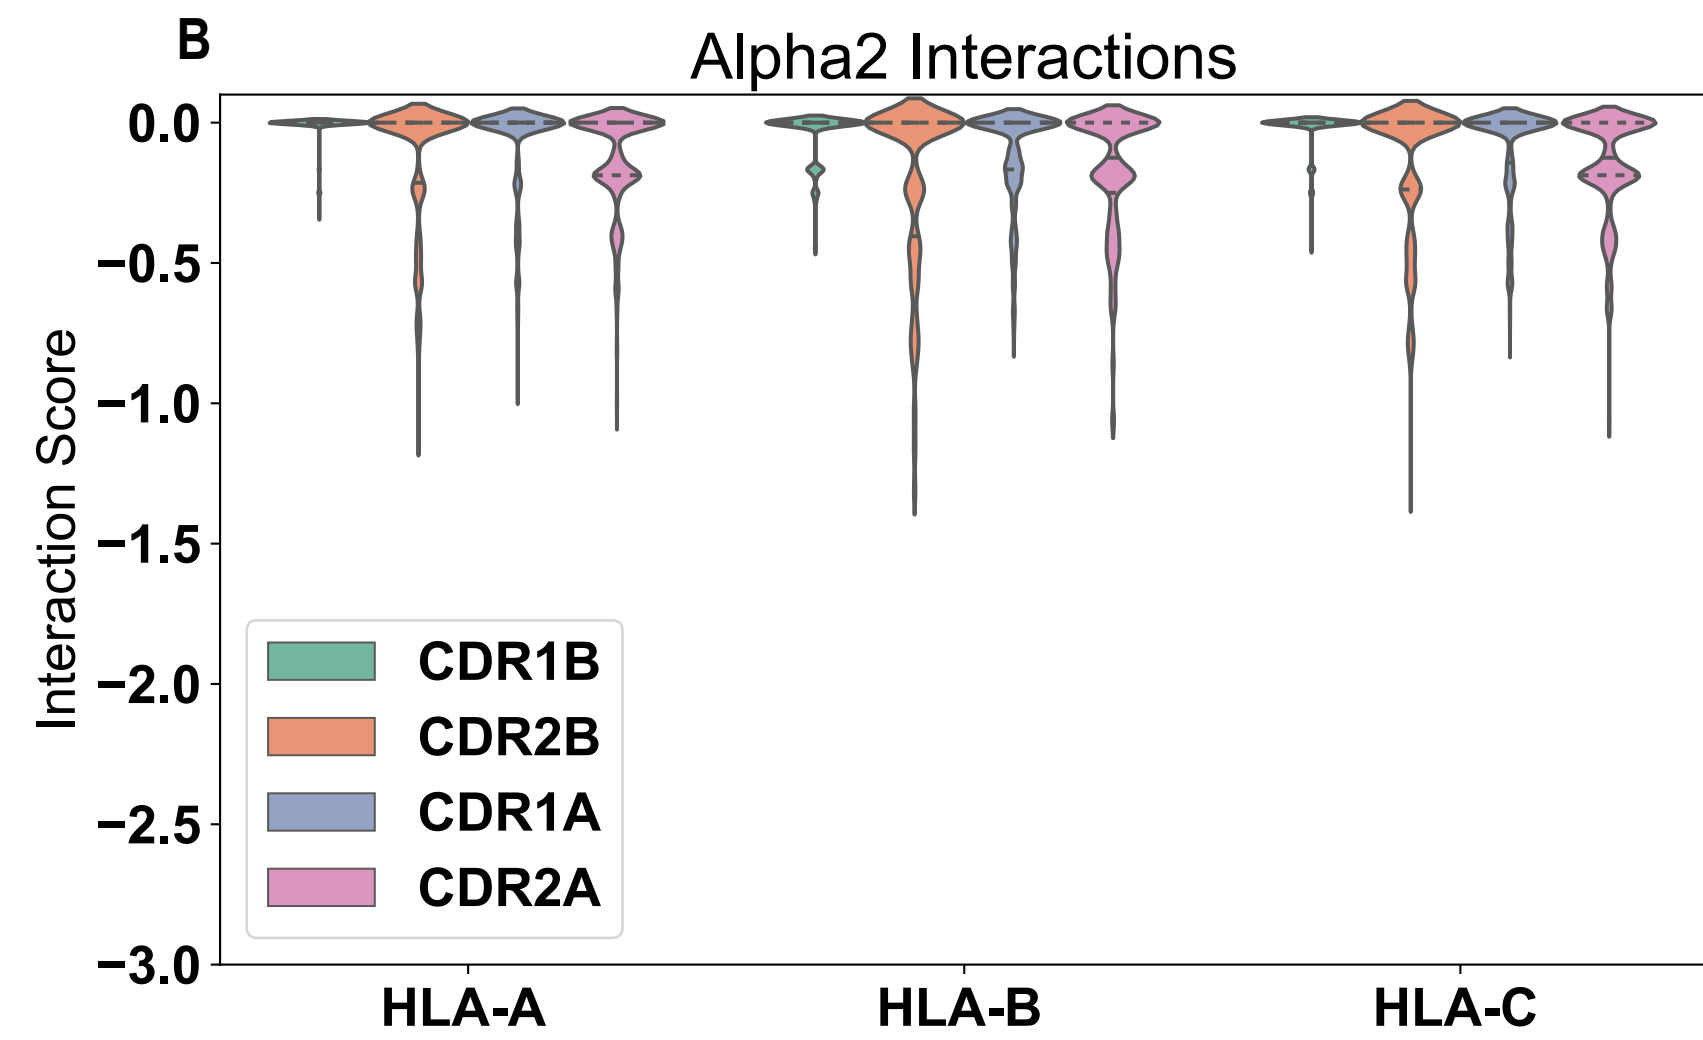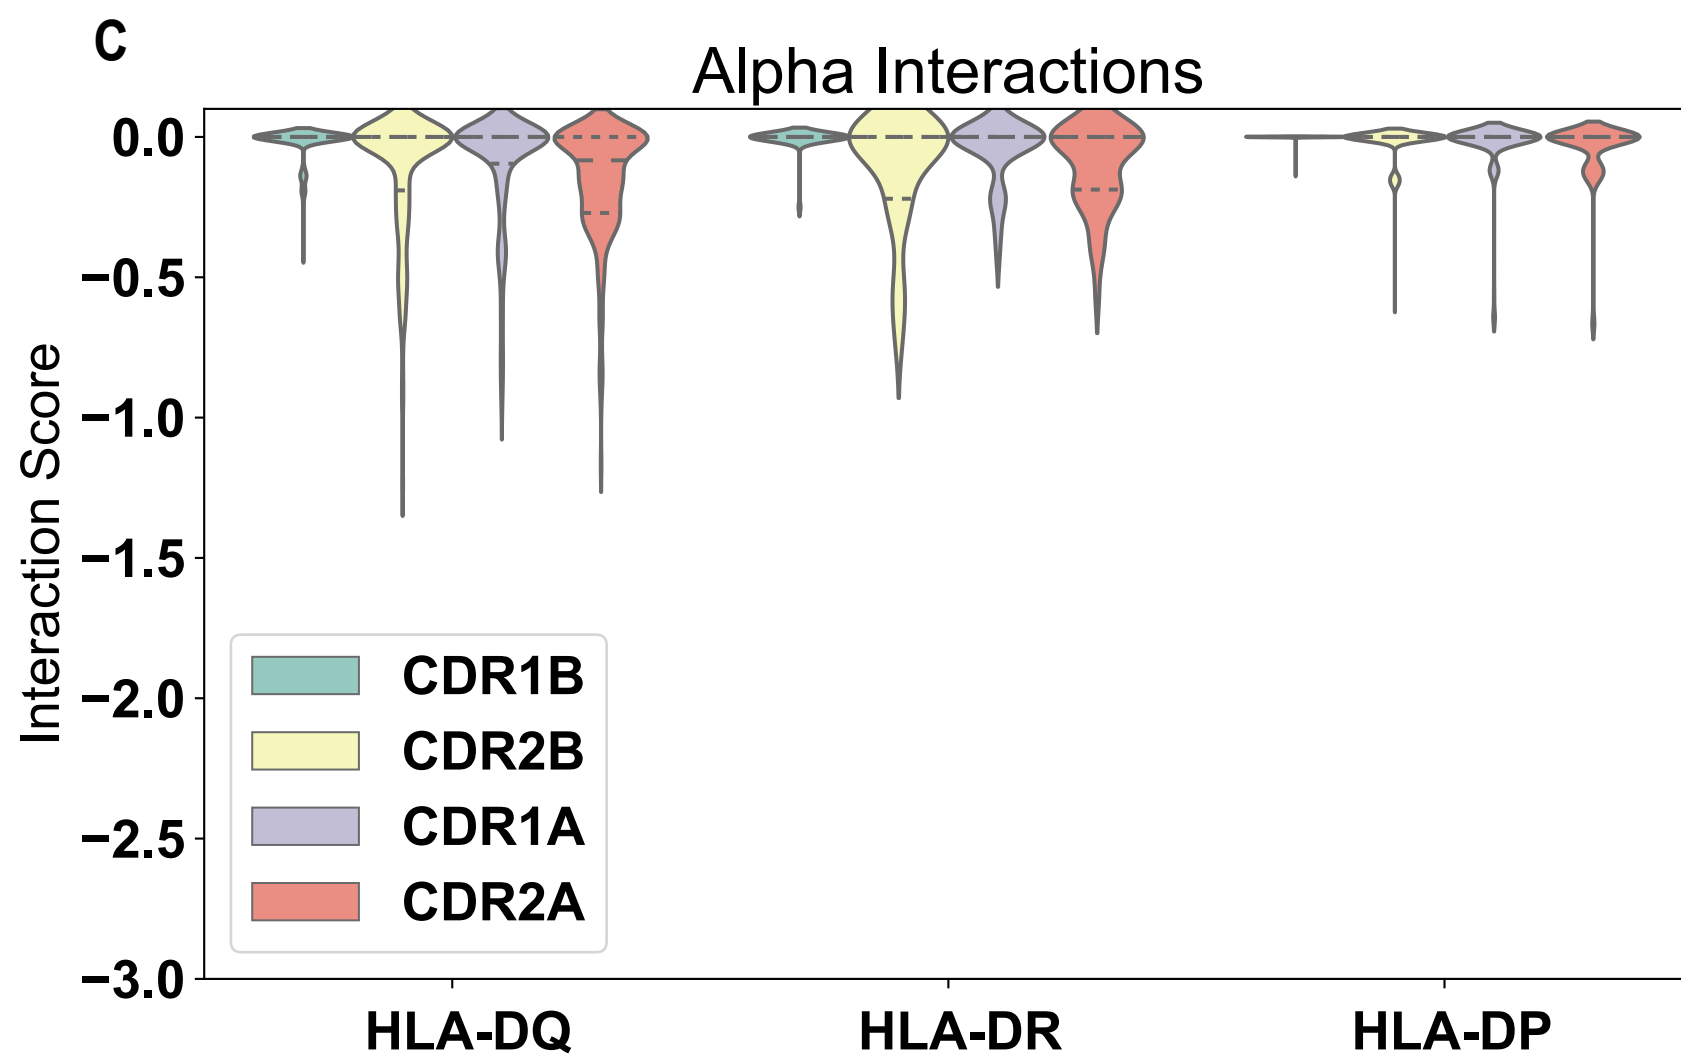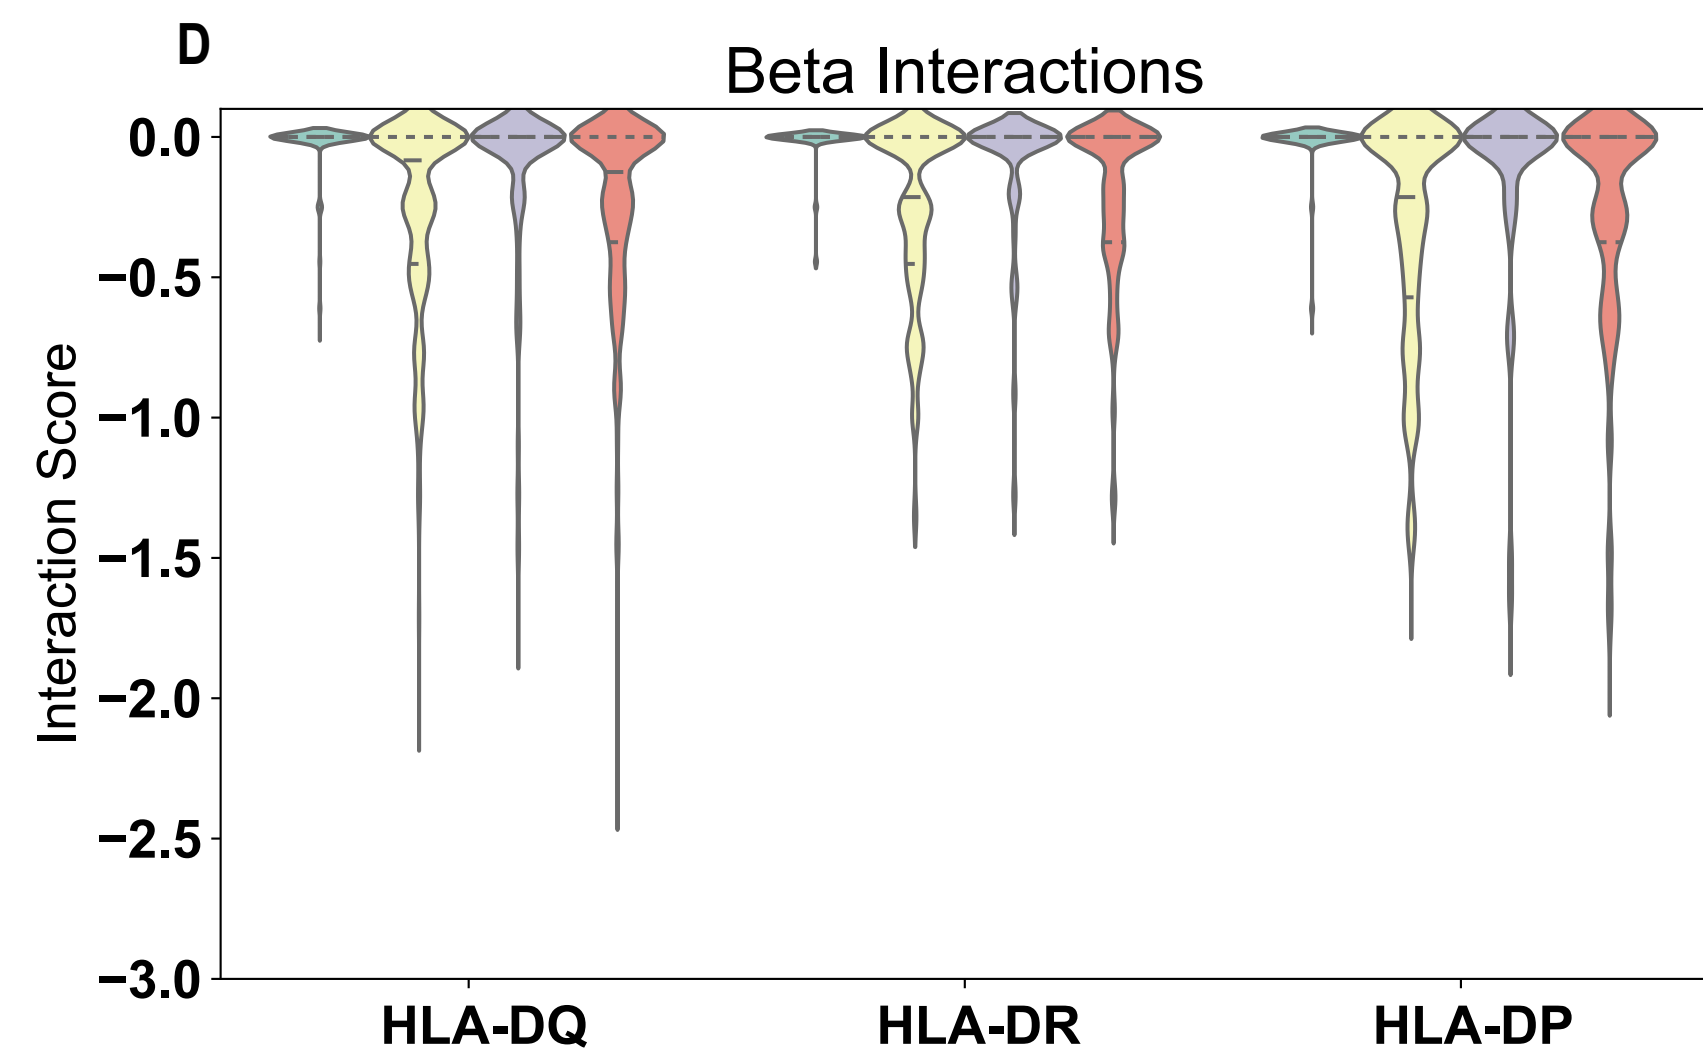

Supplement: supp [file elife-90681-supp-v1.zip]

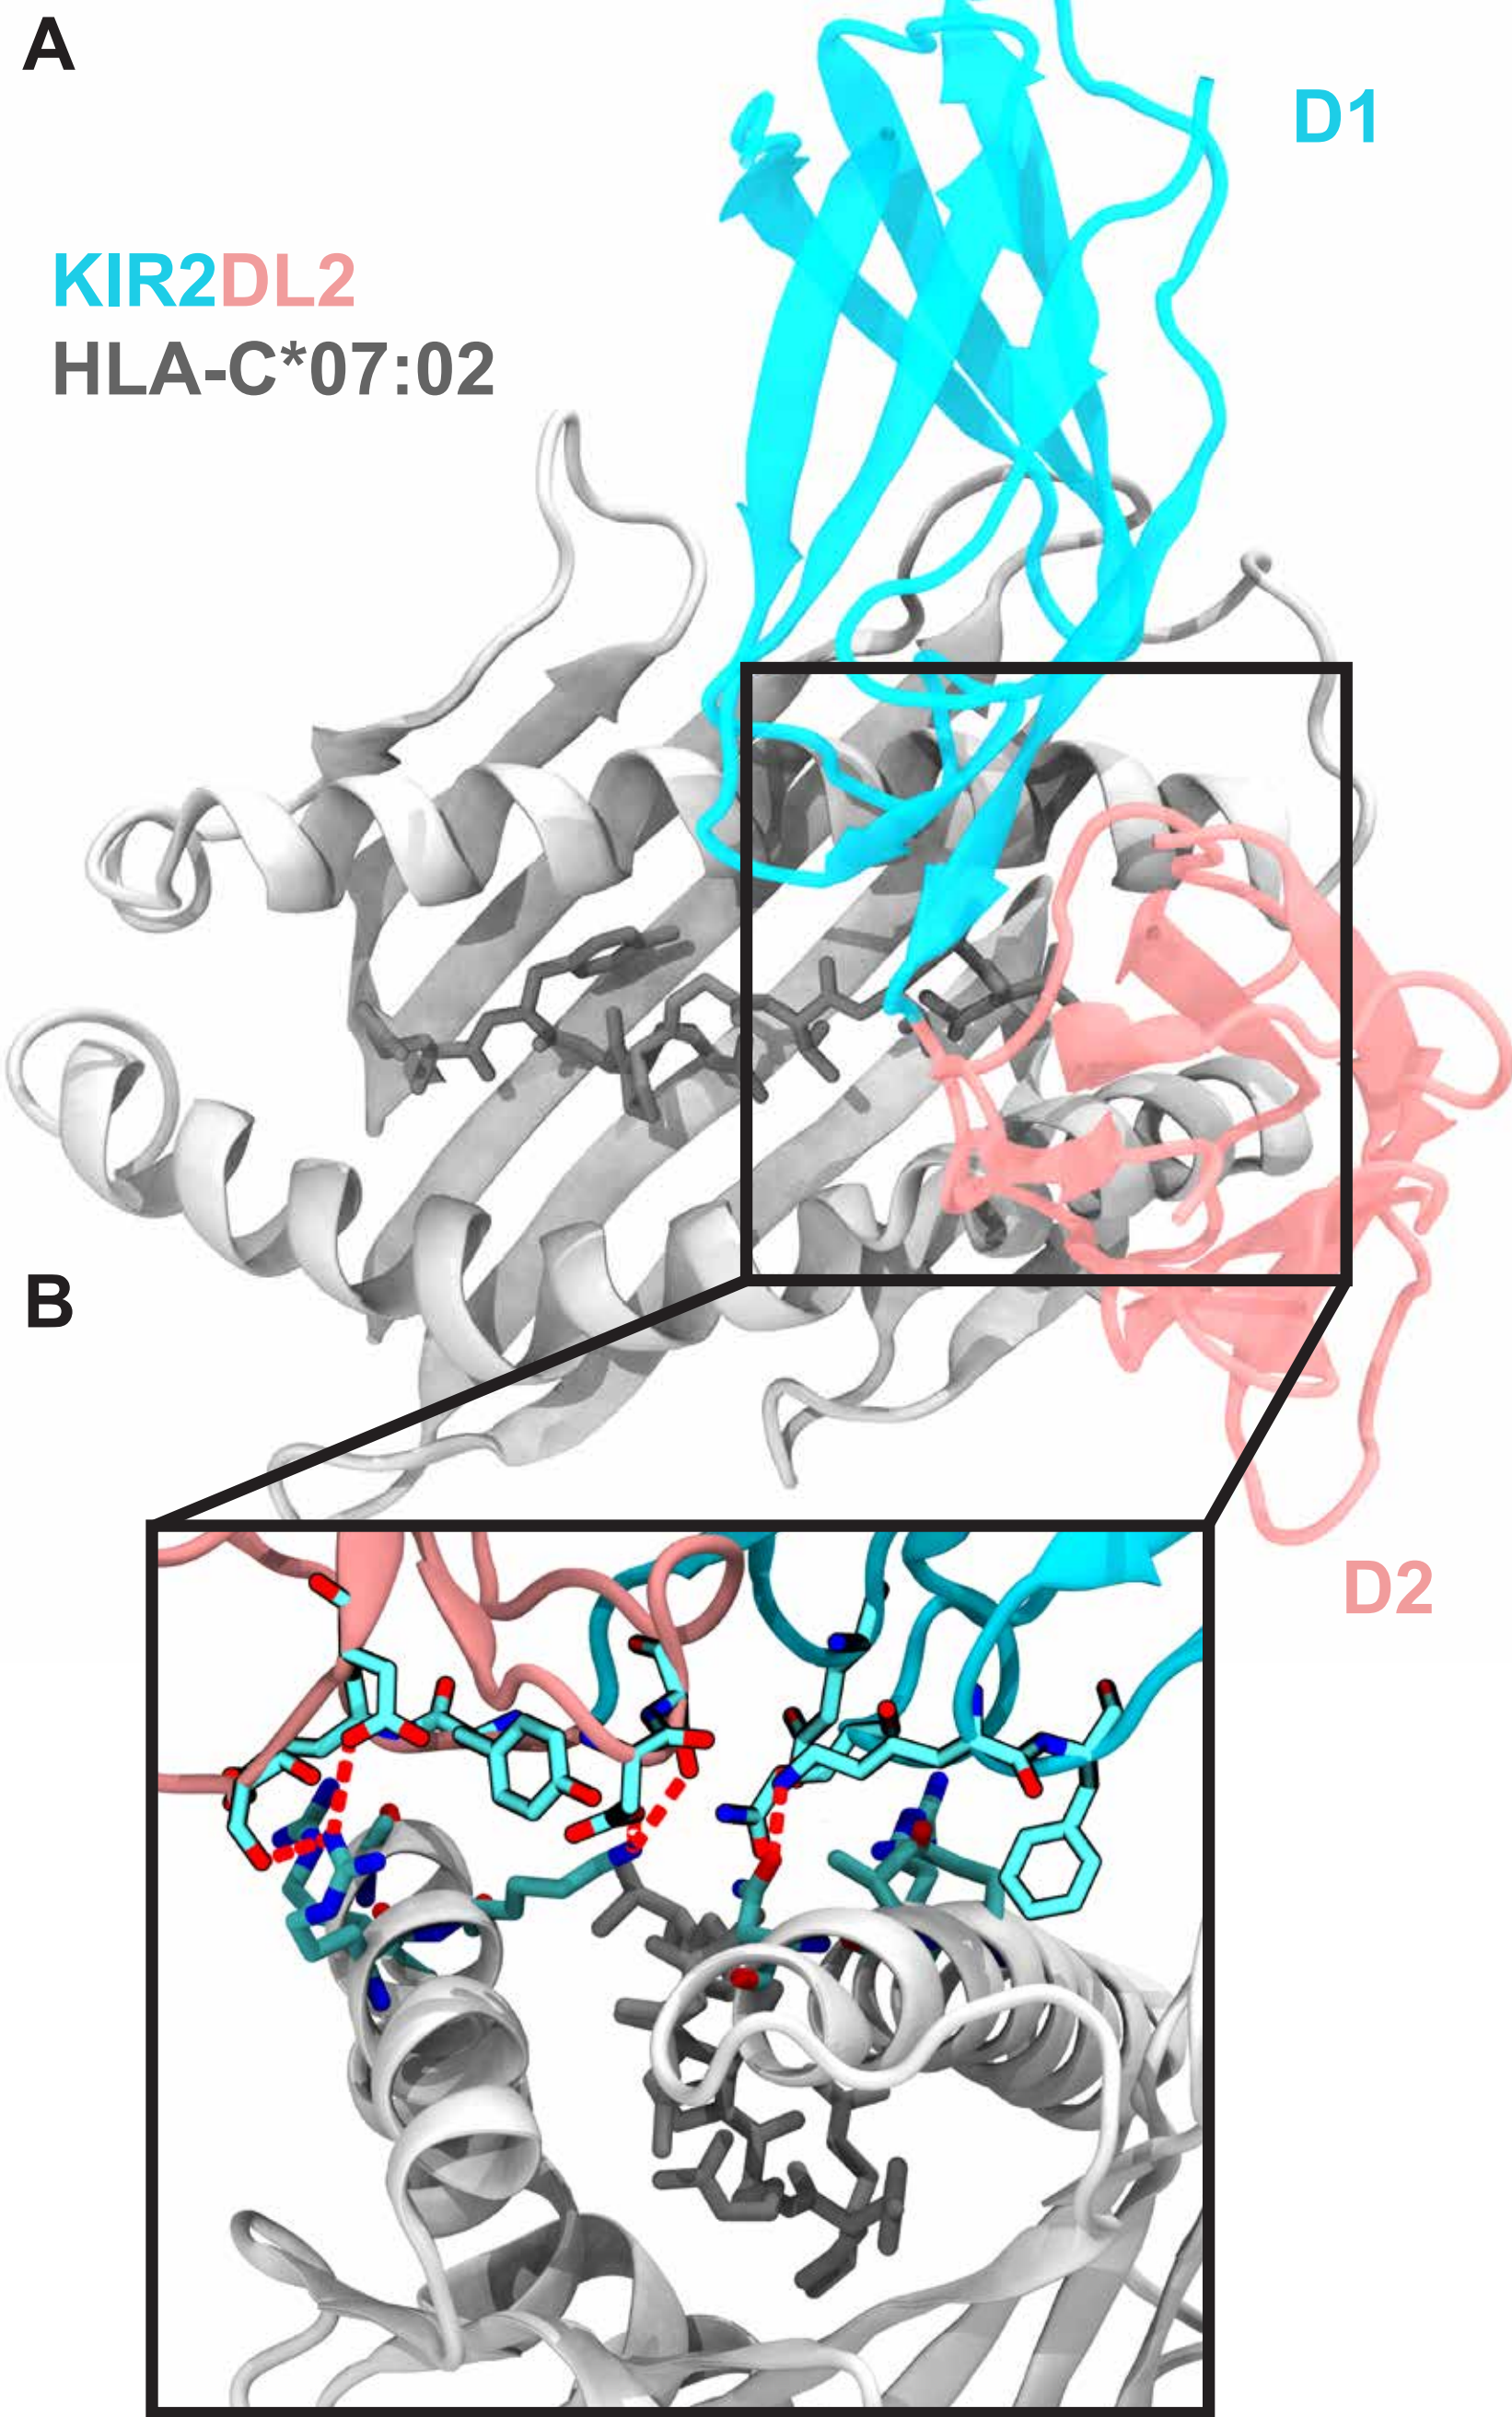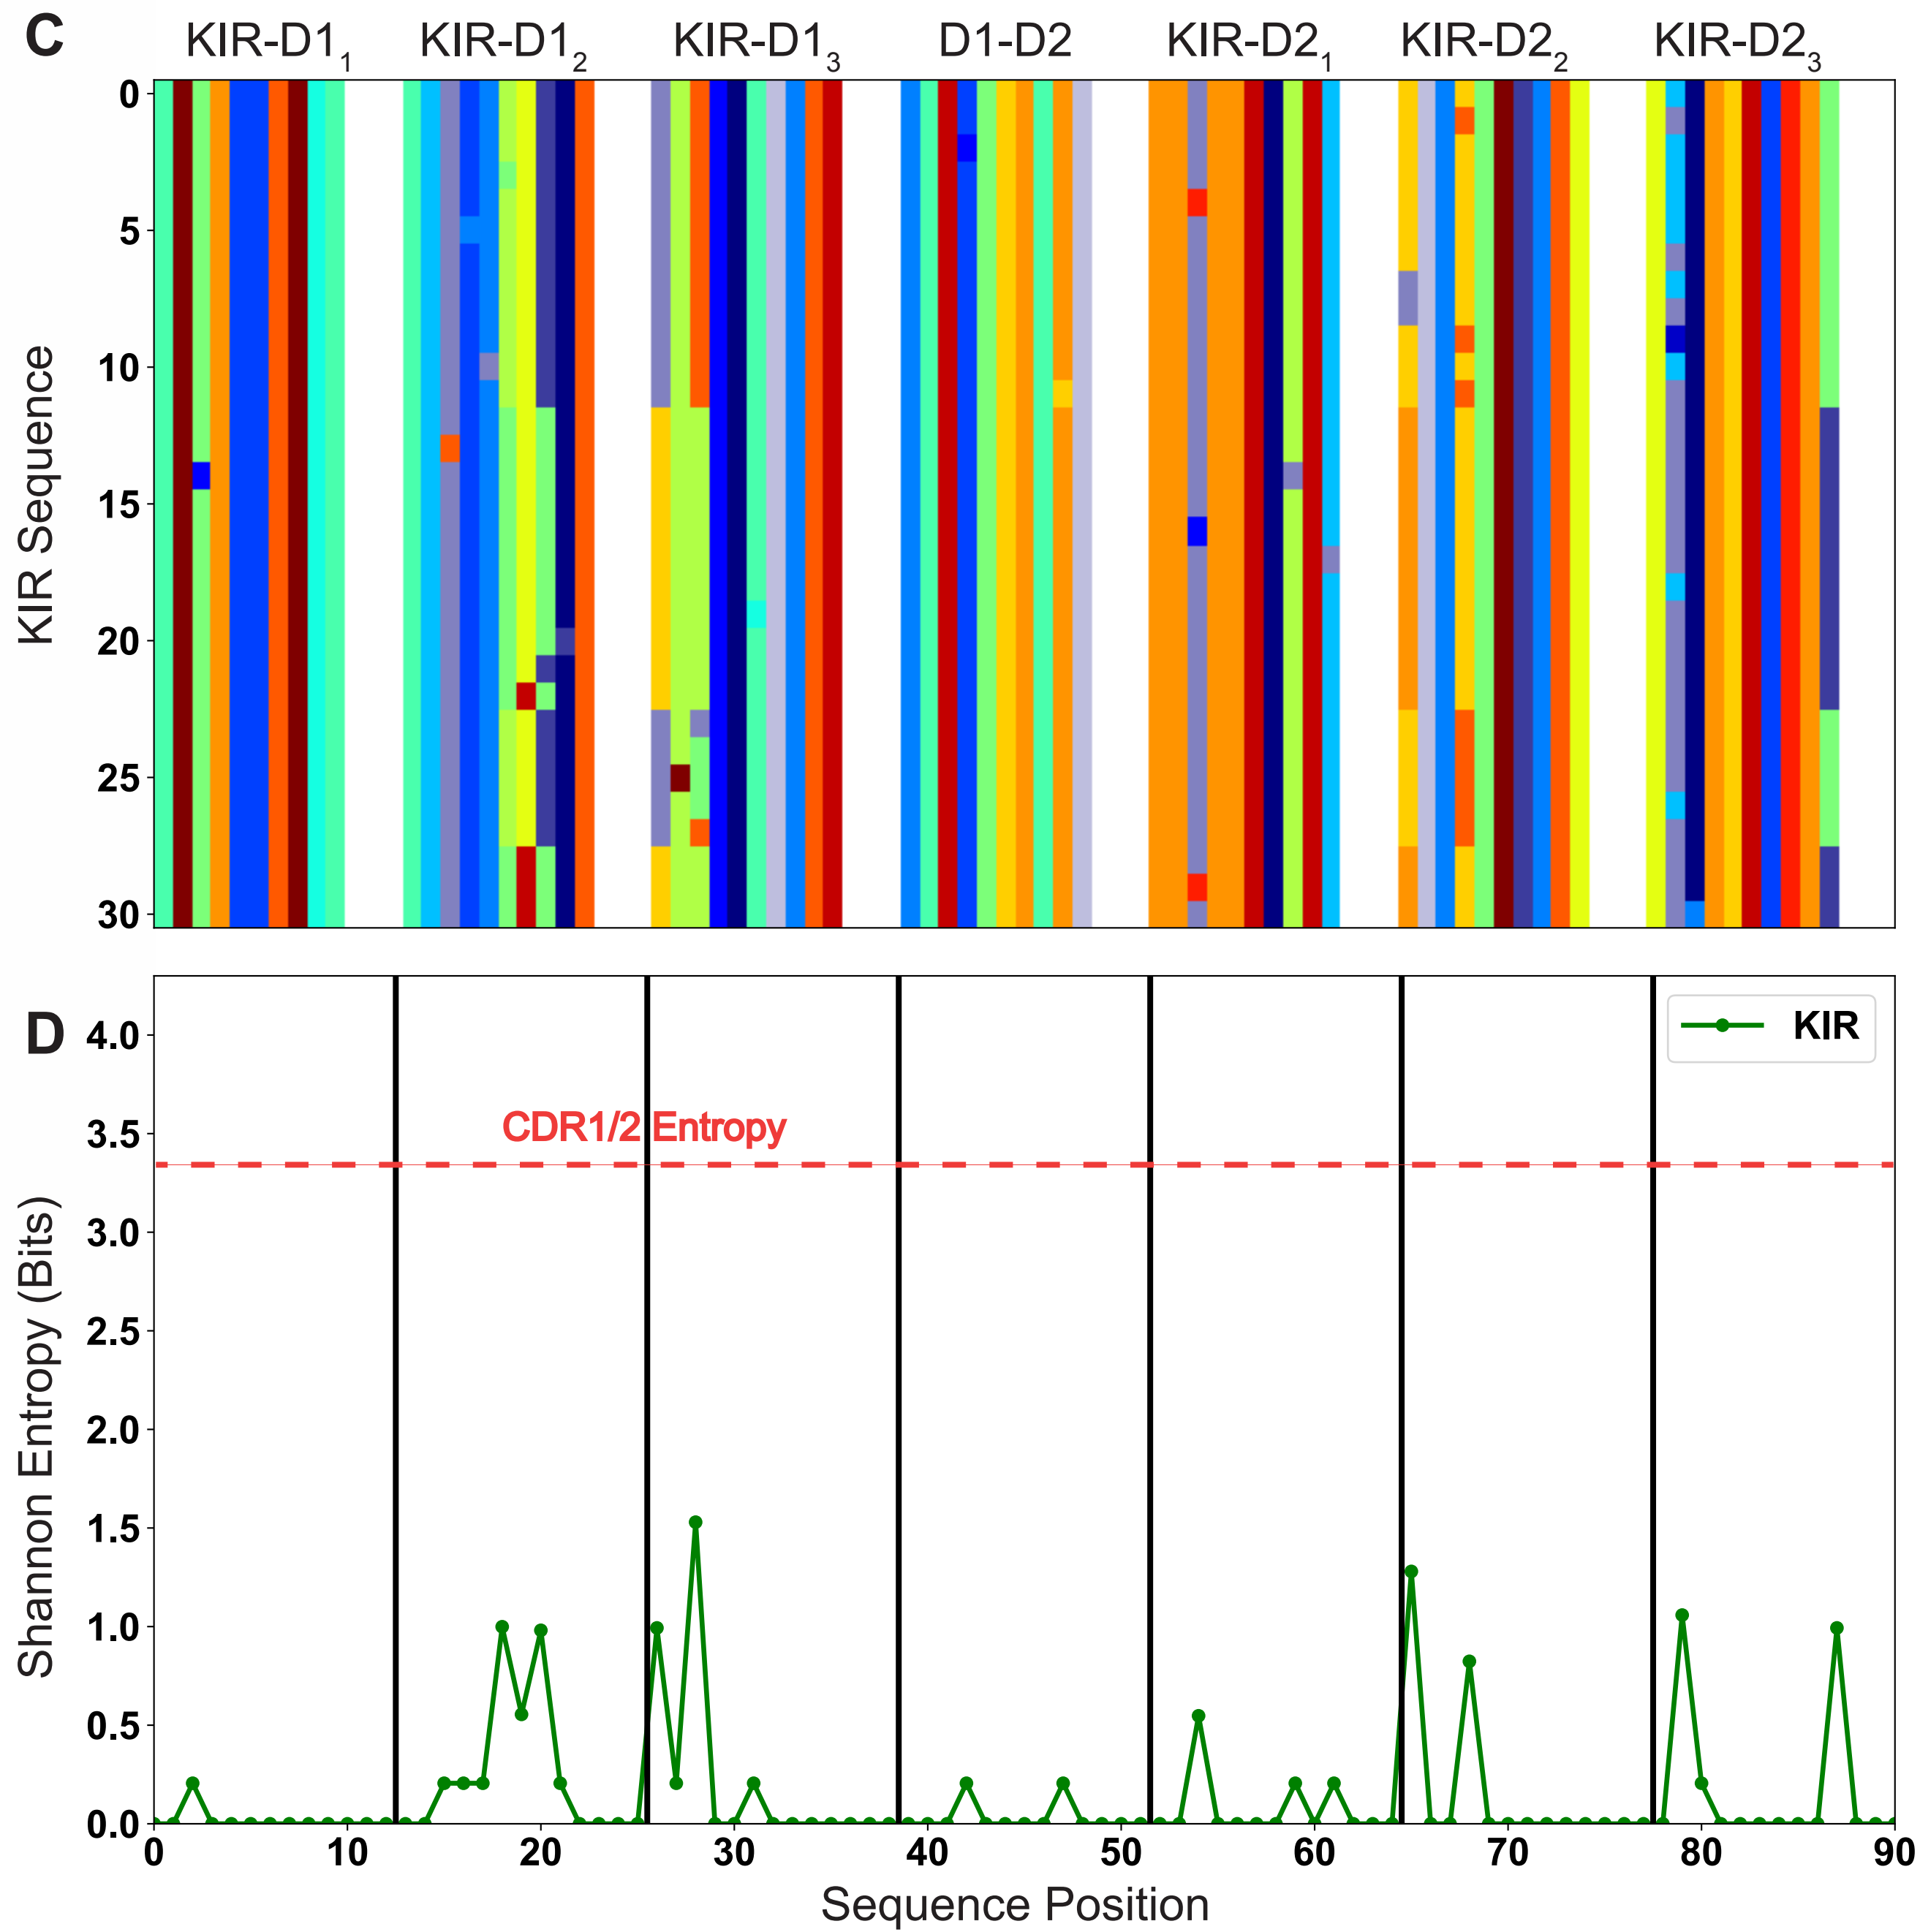

Supplement: supp [file elife-90681-supp-v1.zip]

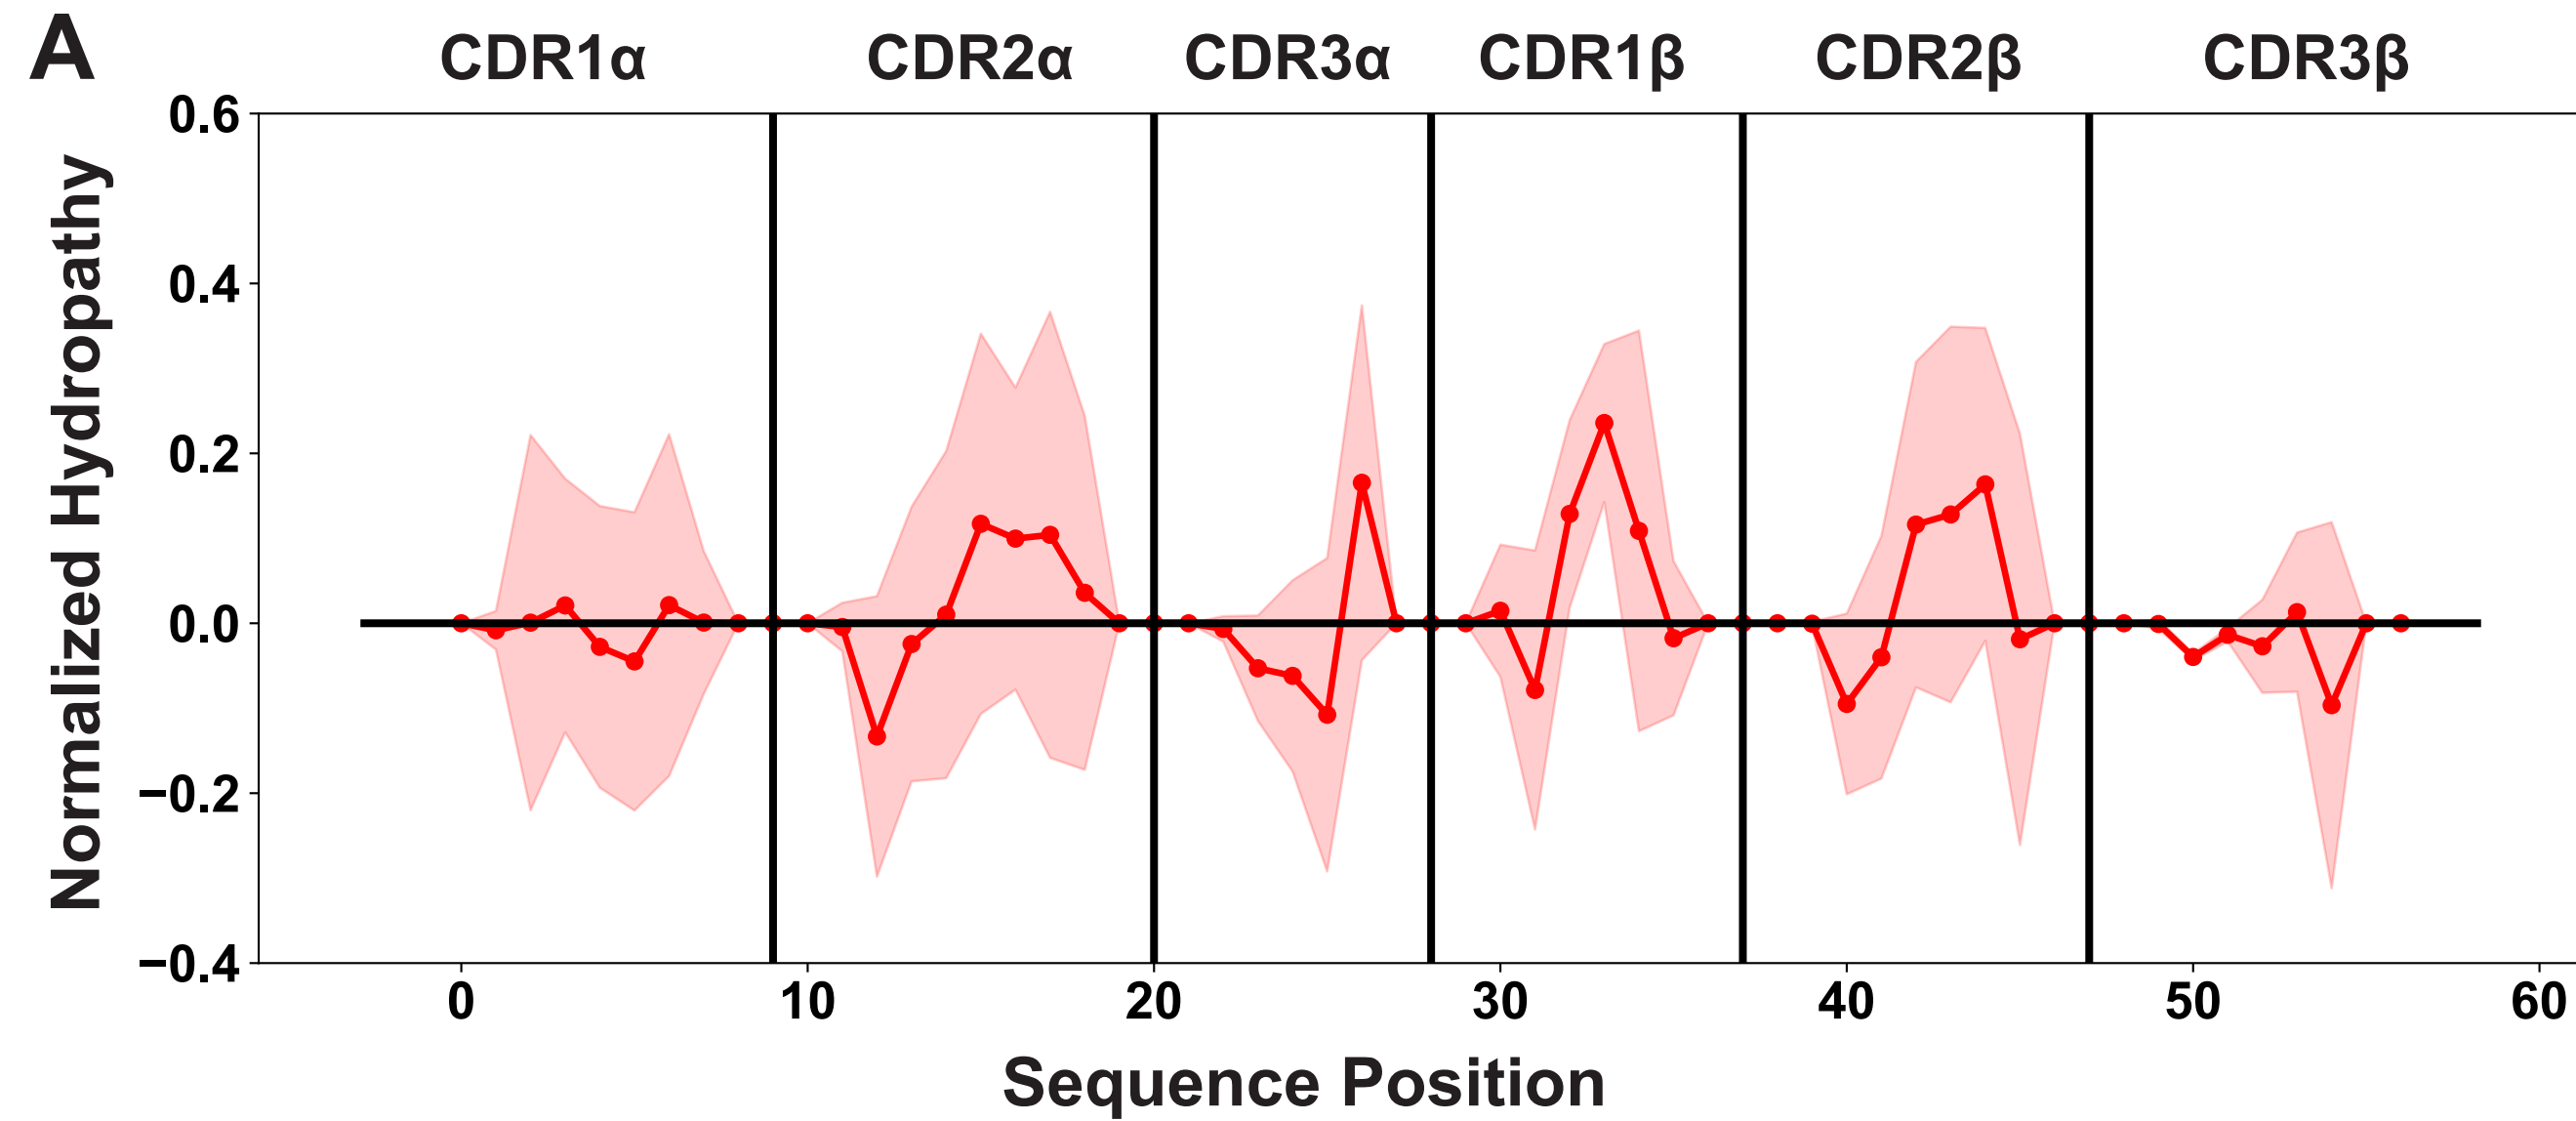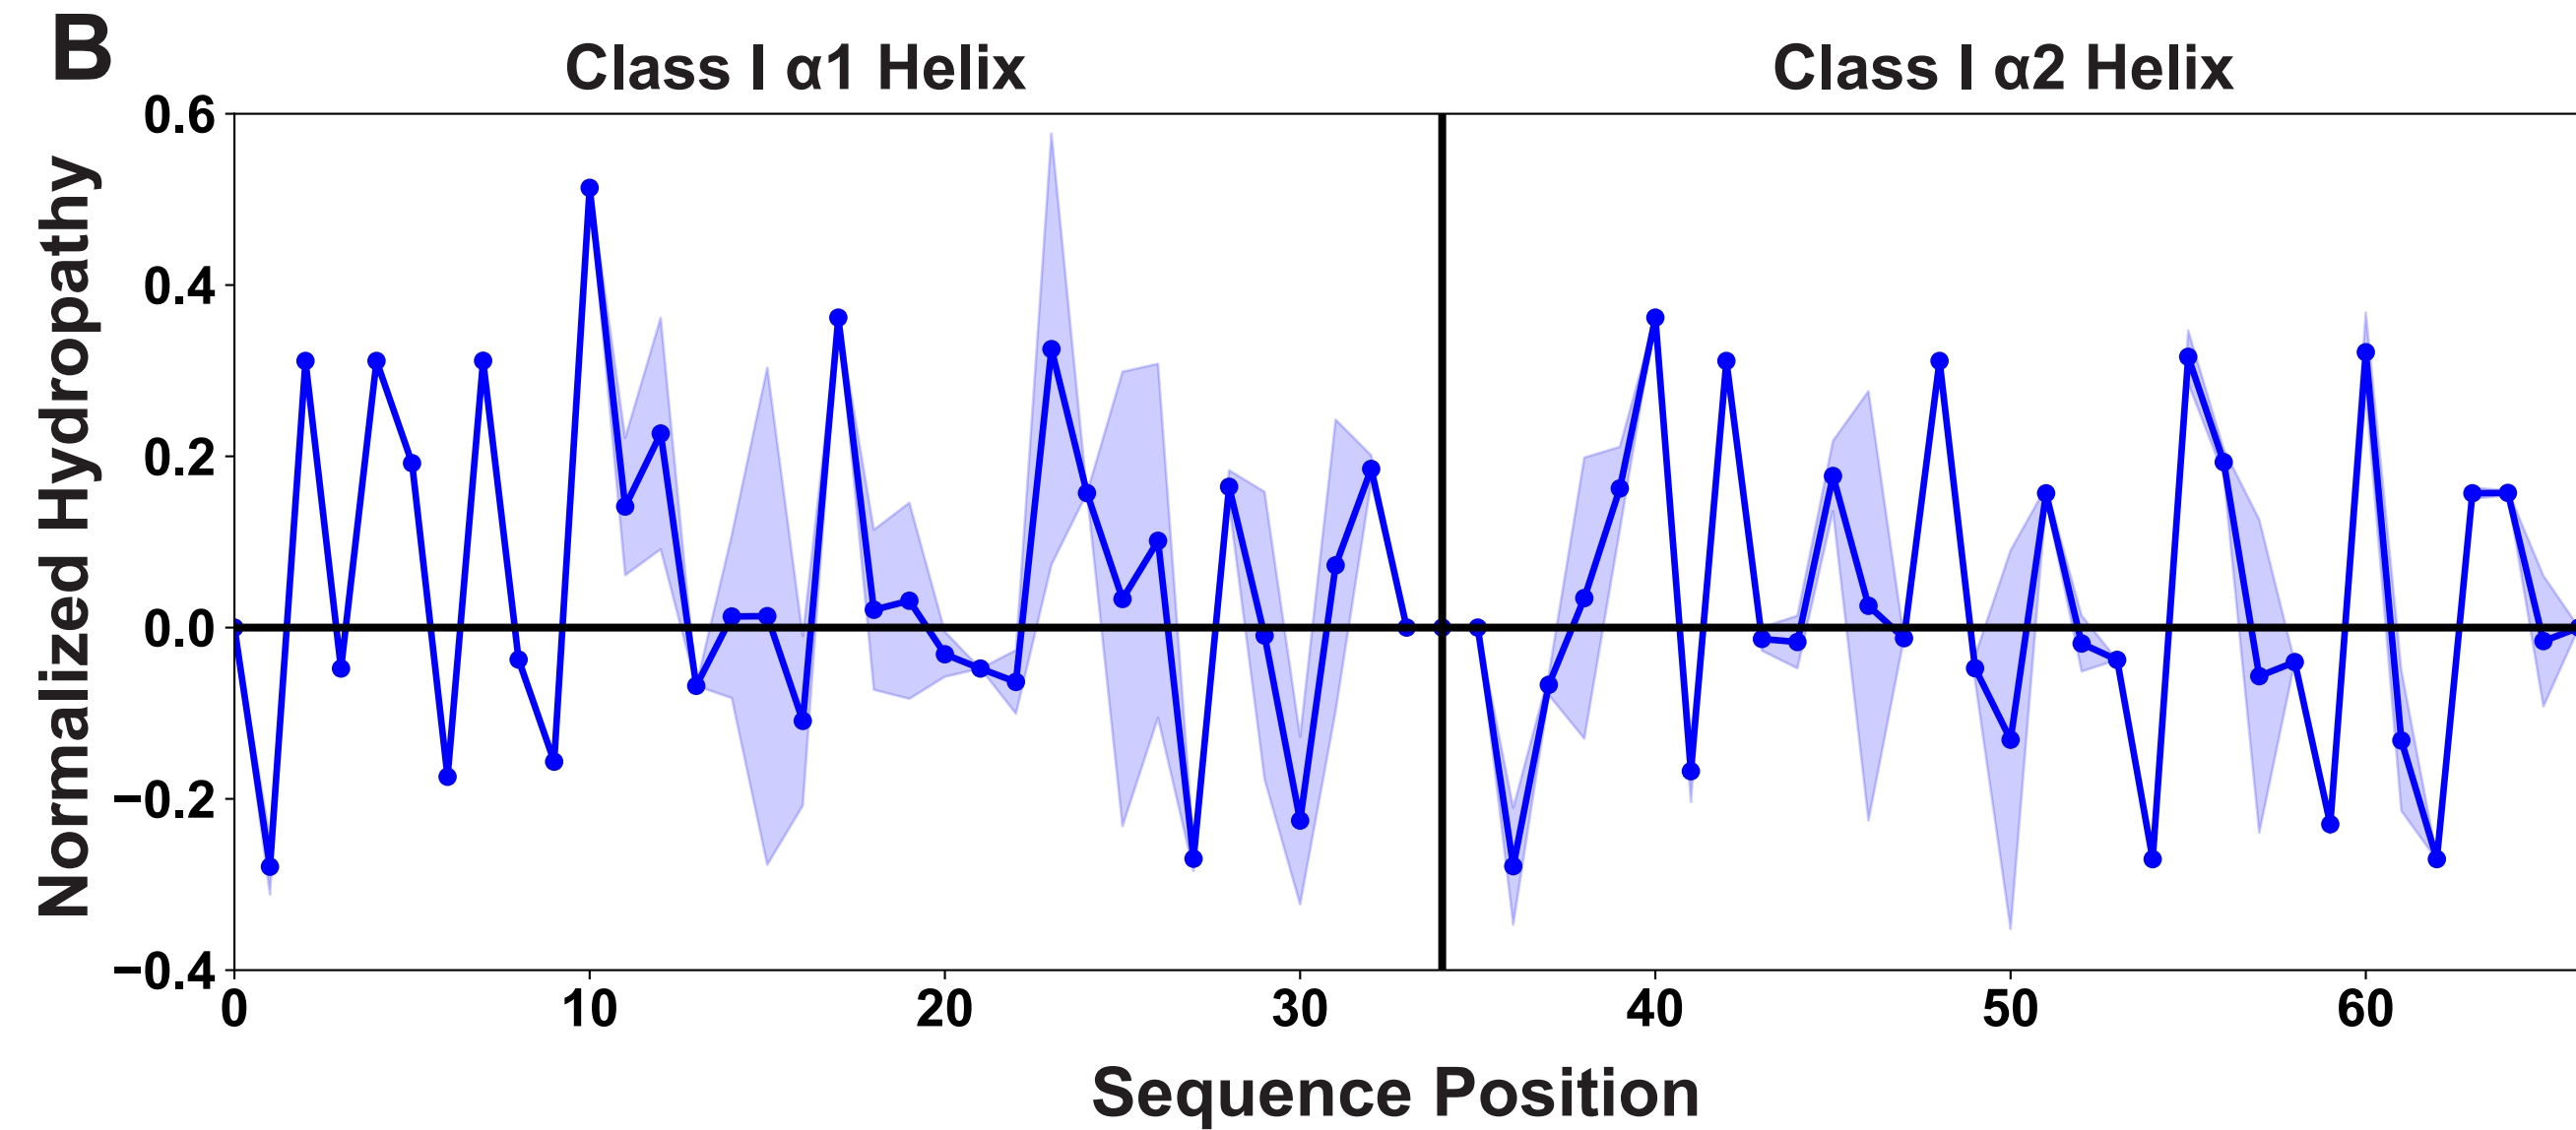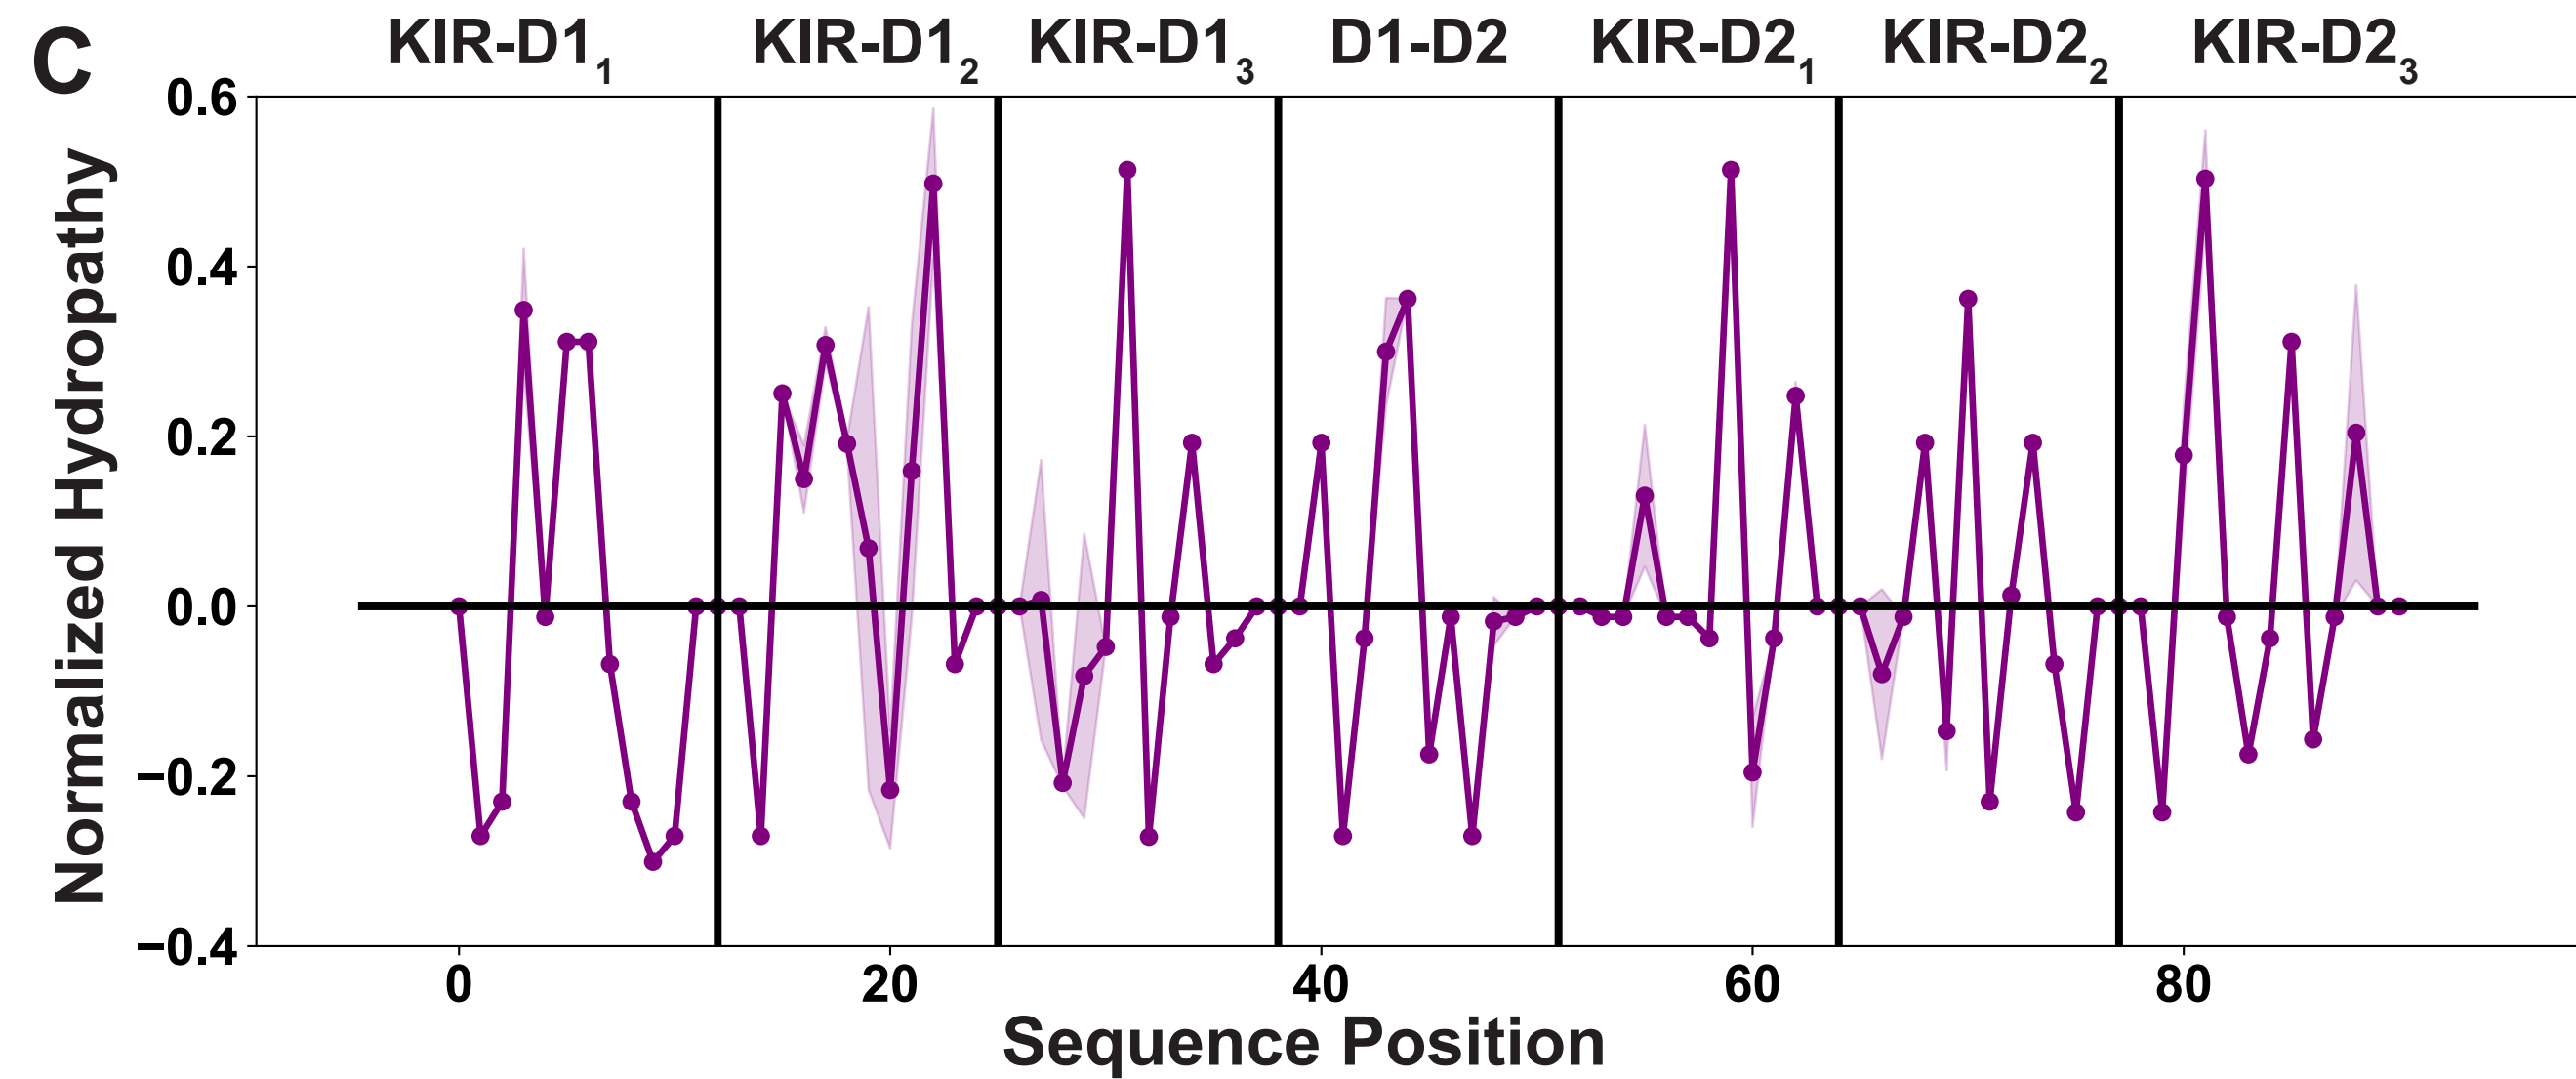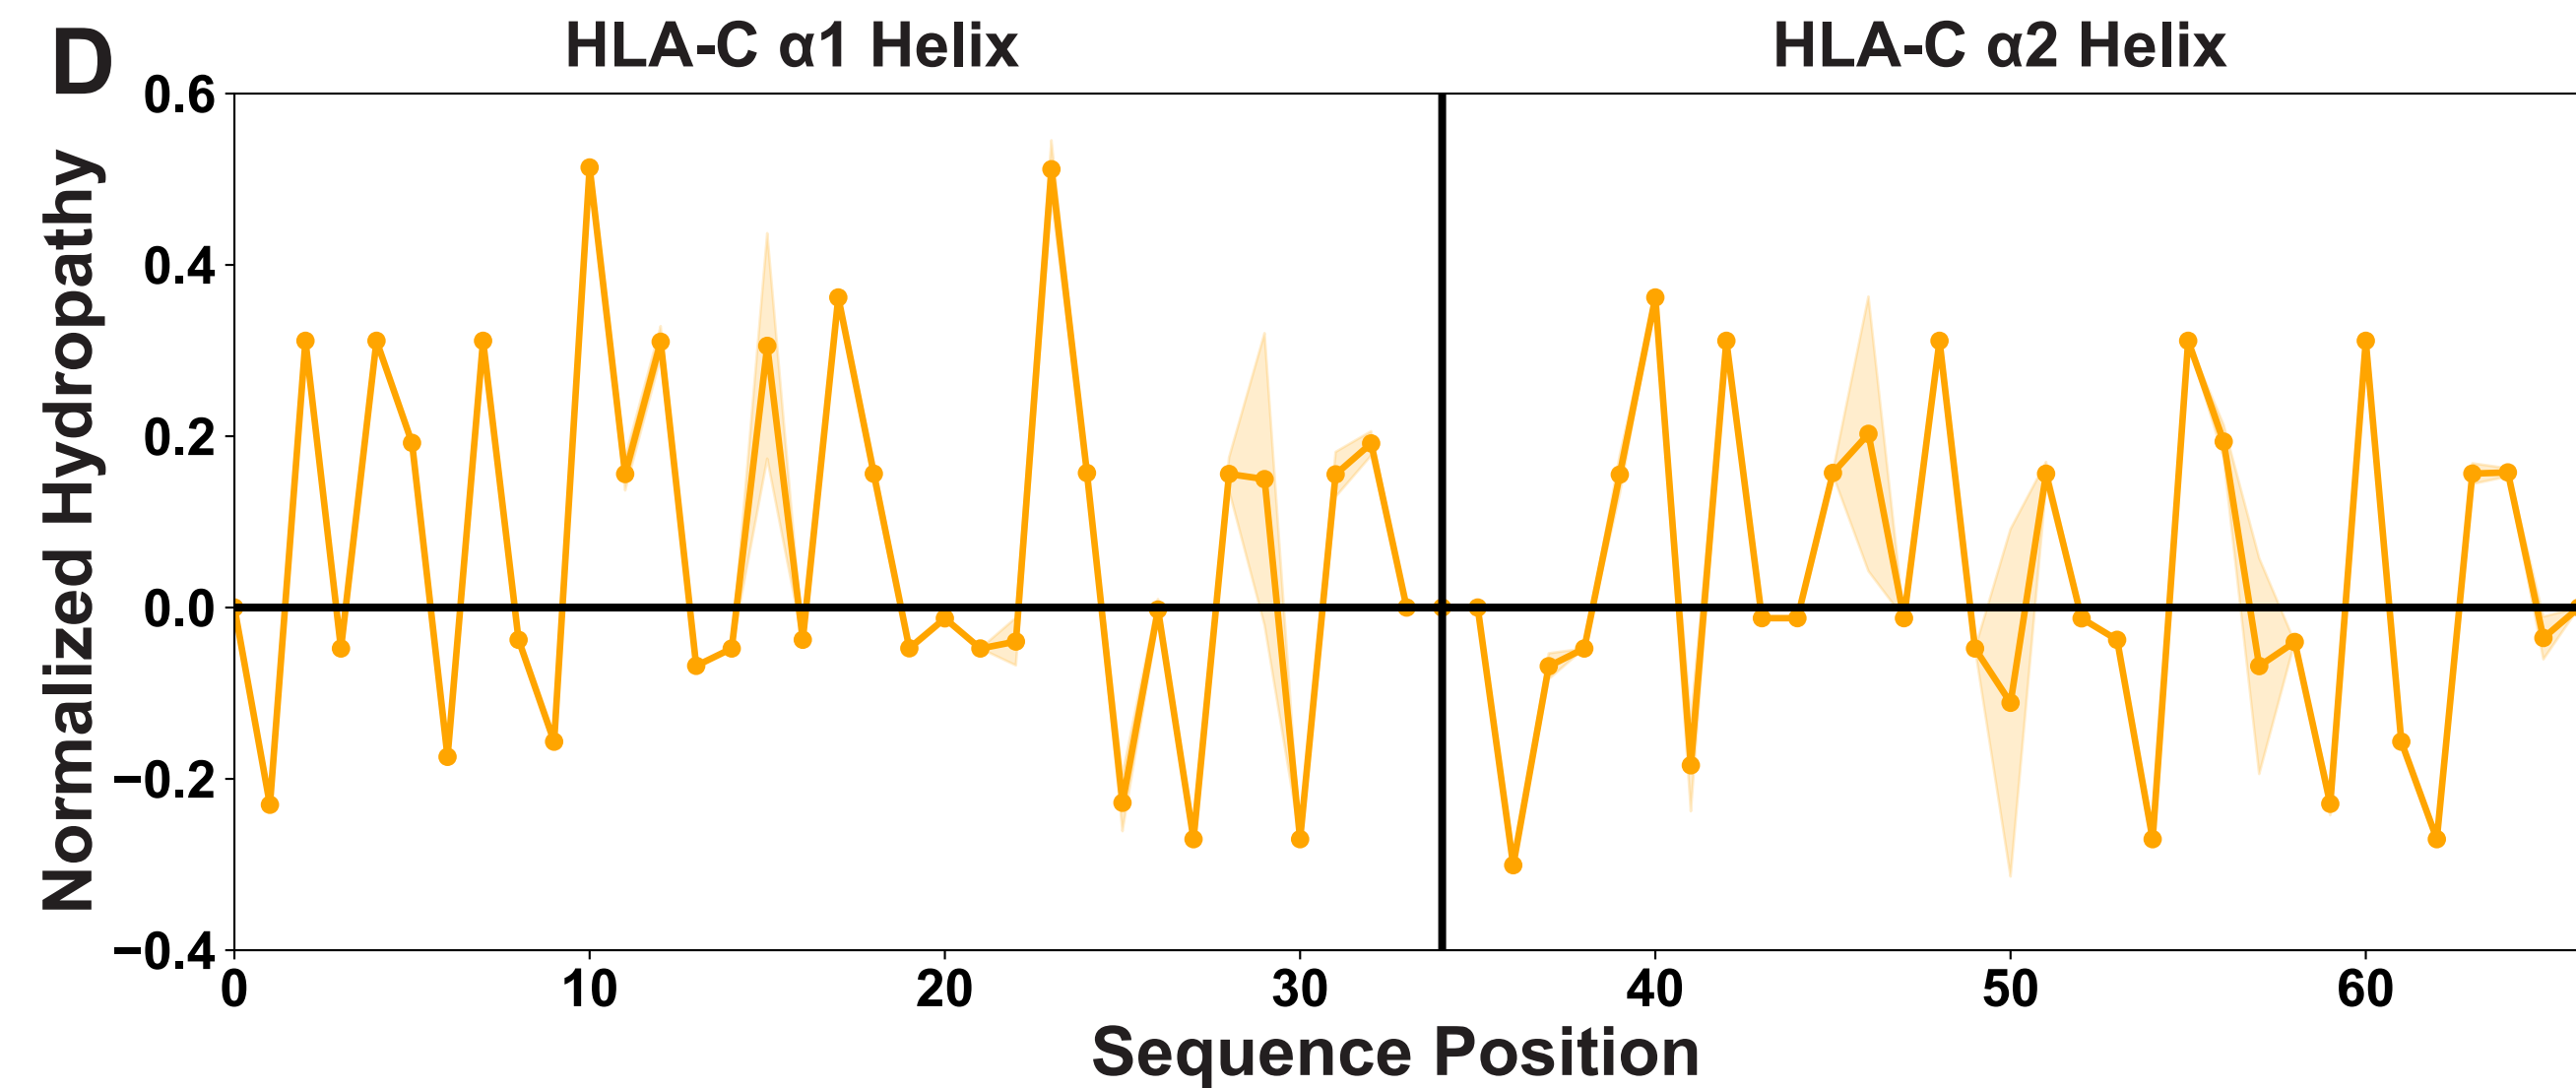

Supplement: supp [file elife-90681-supp-v1.zip]

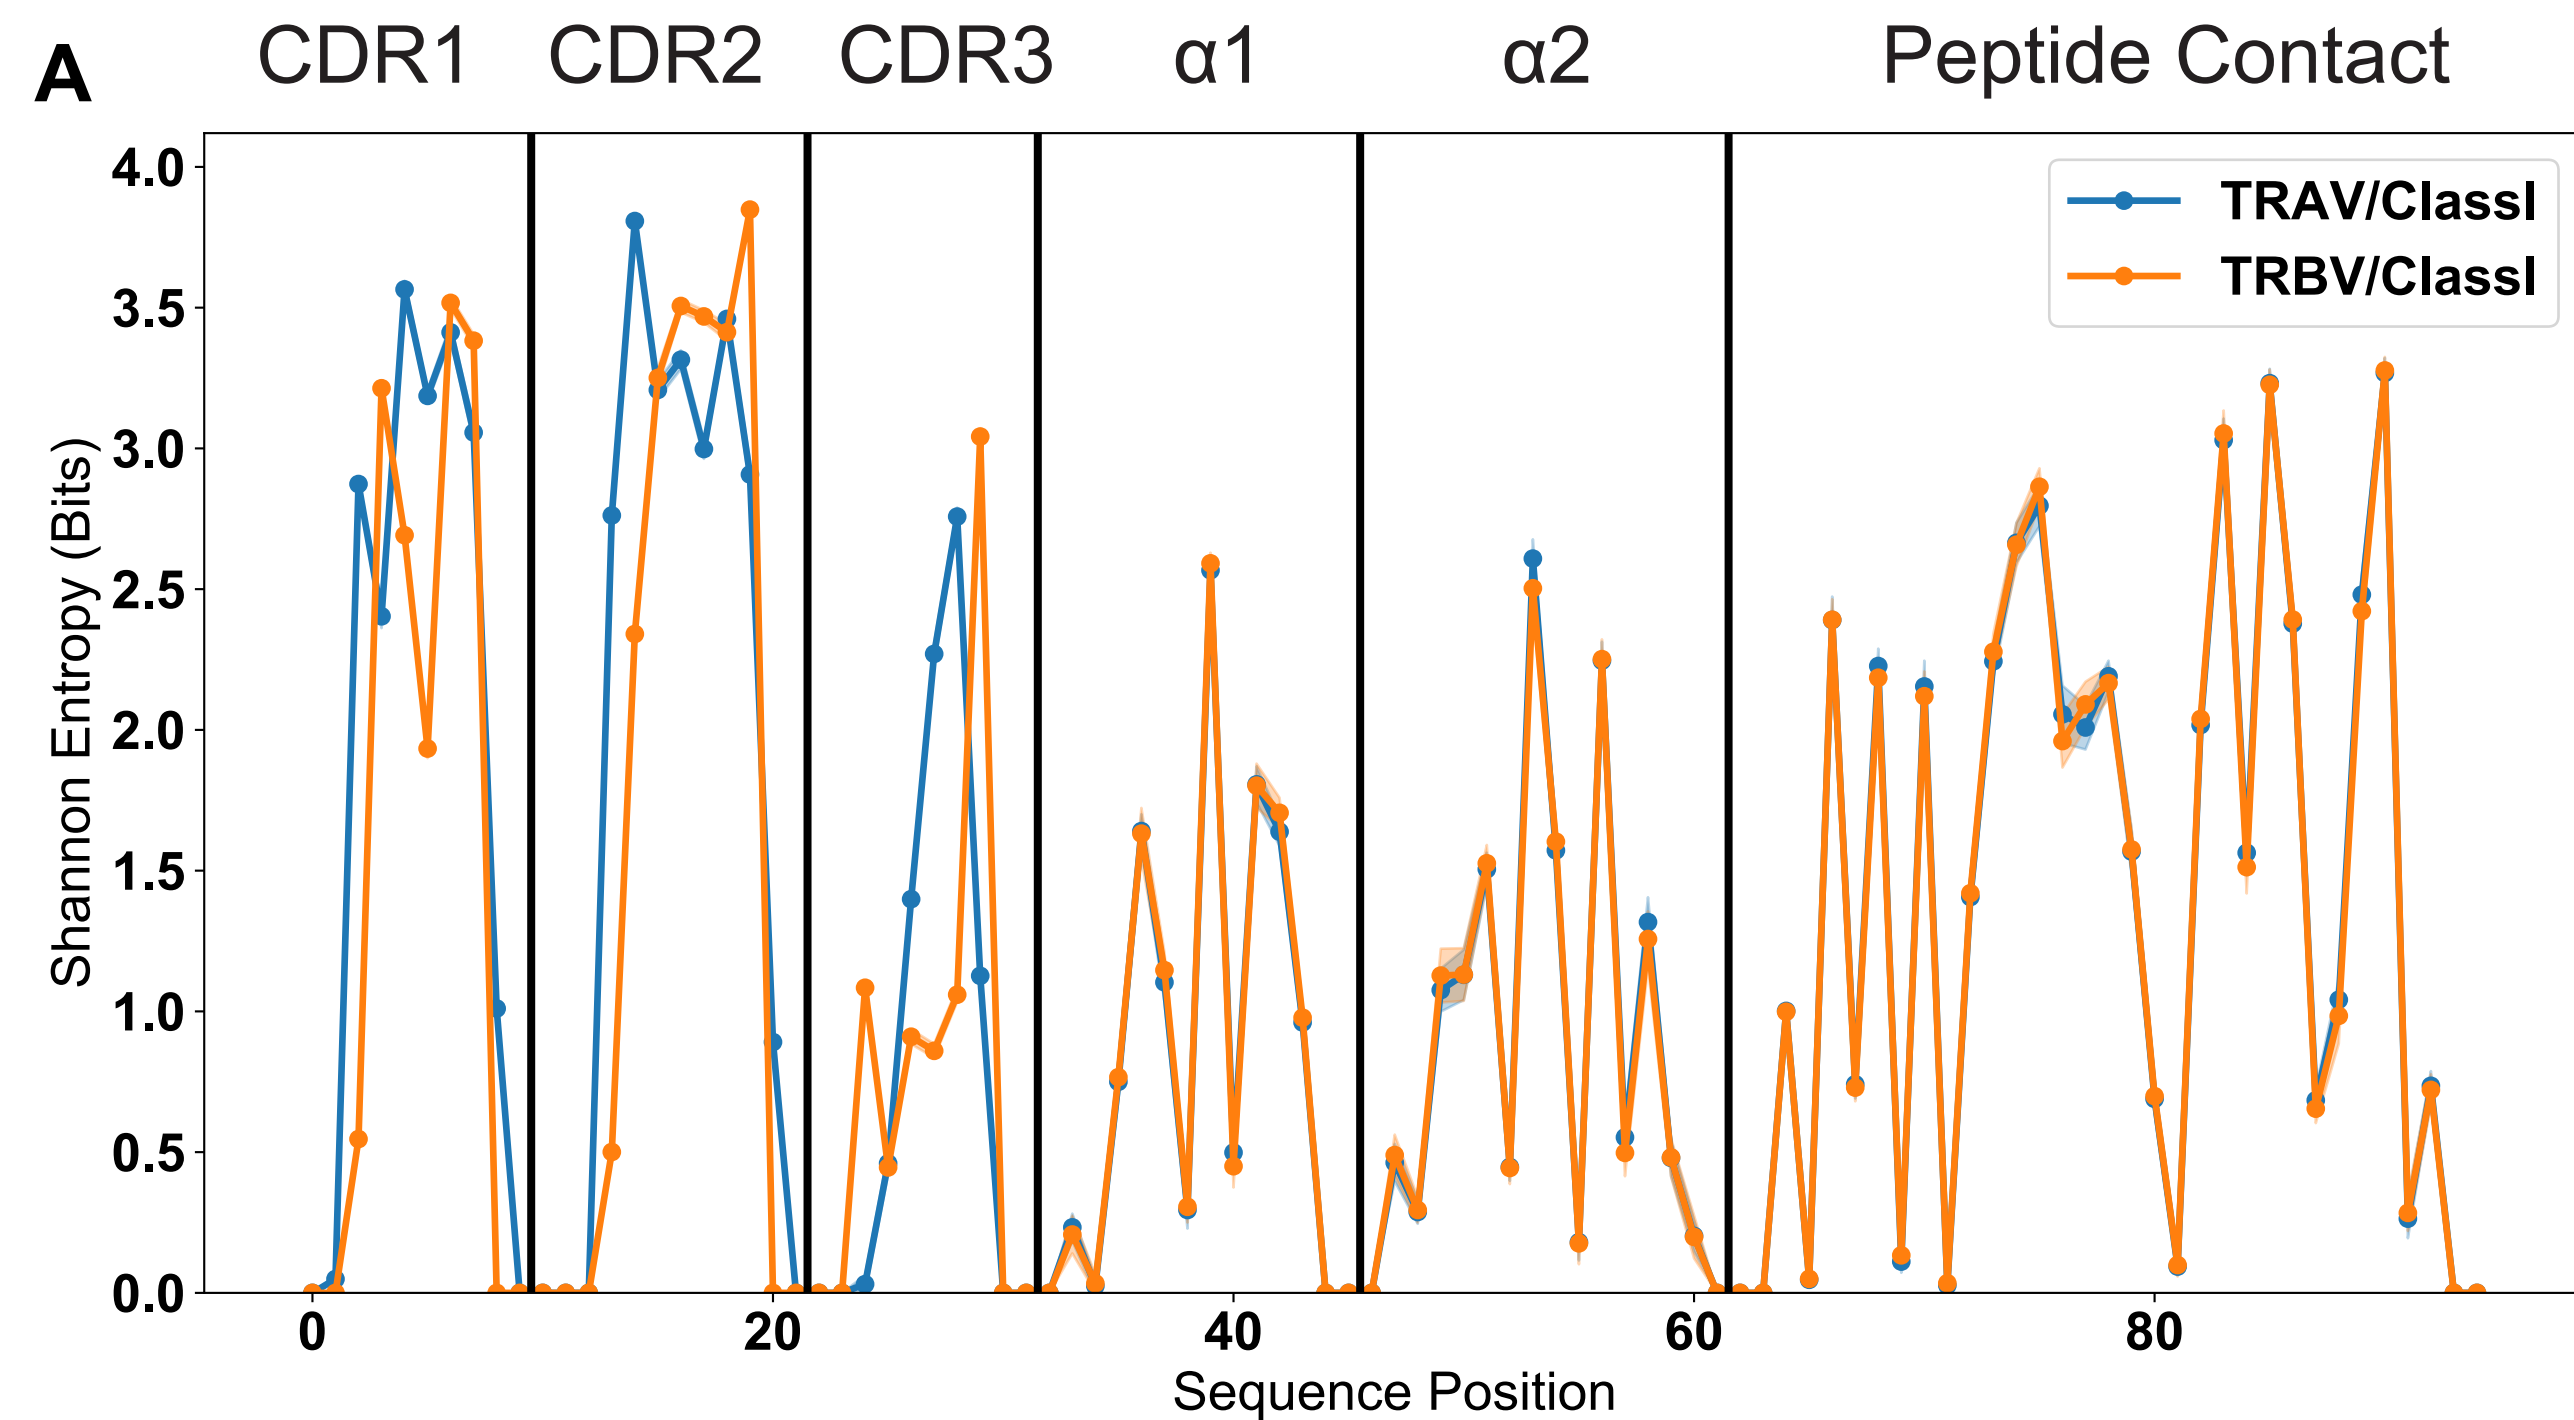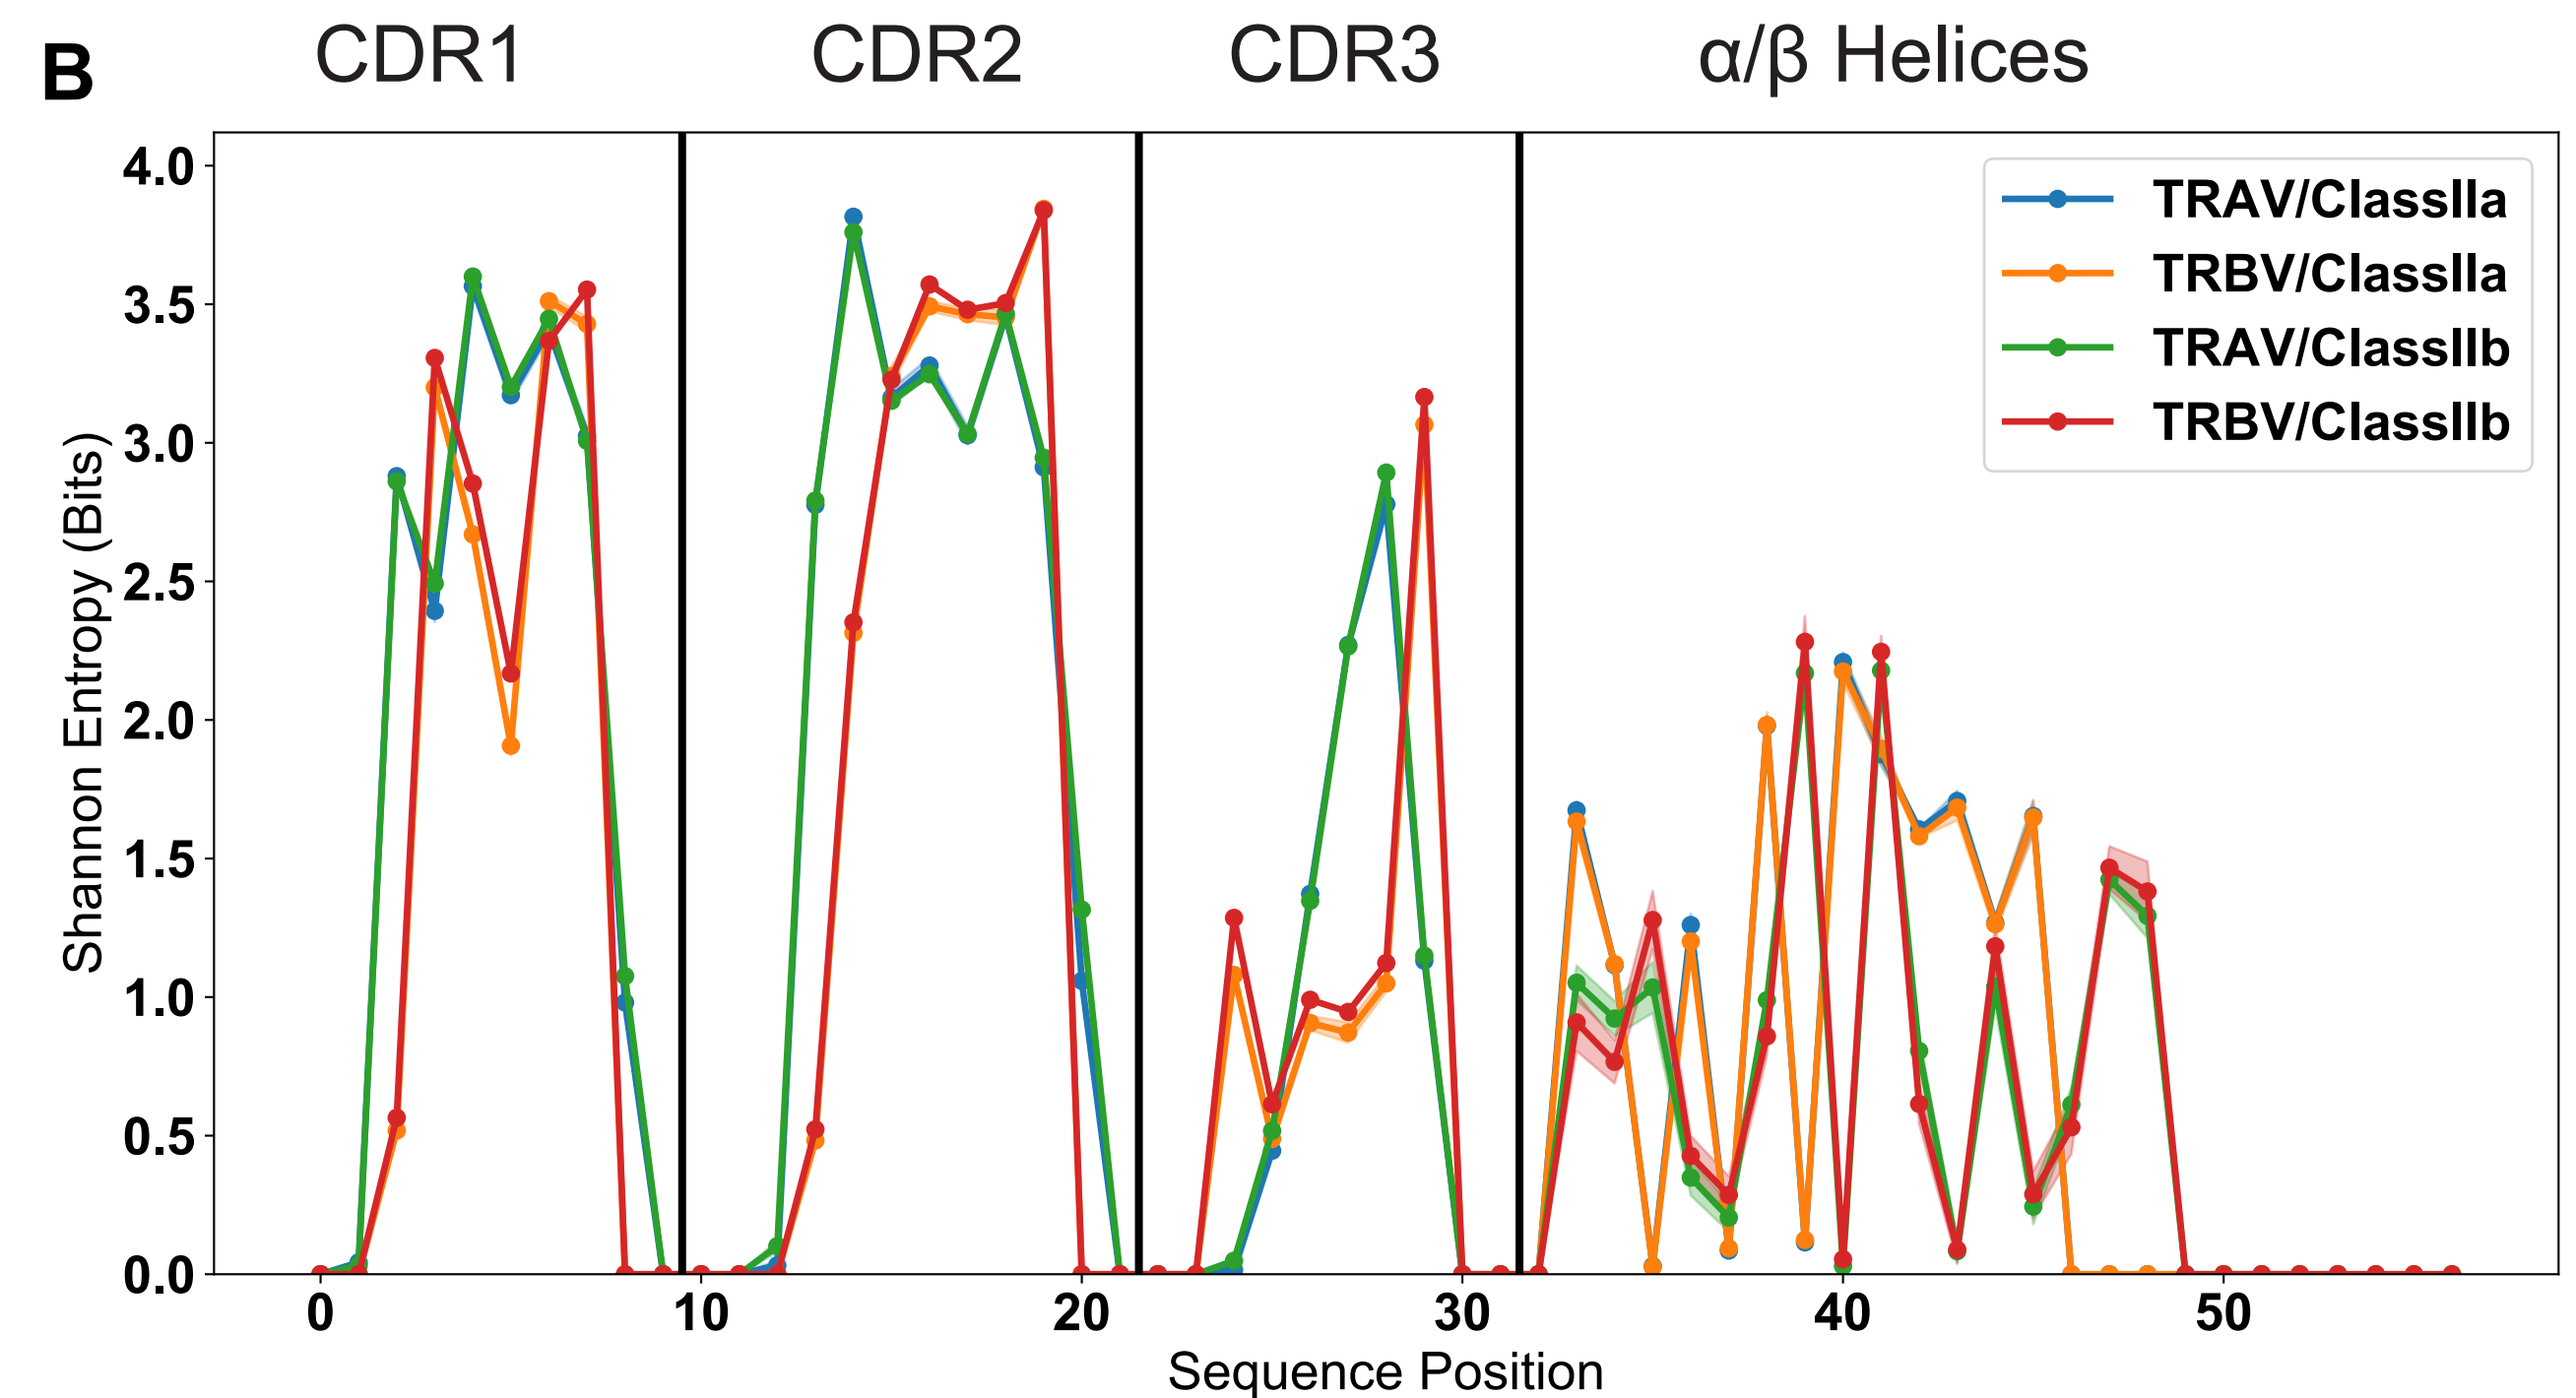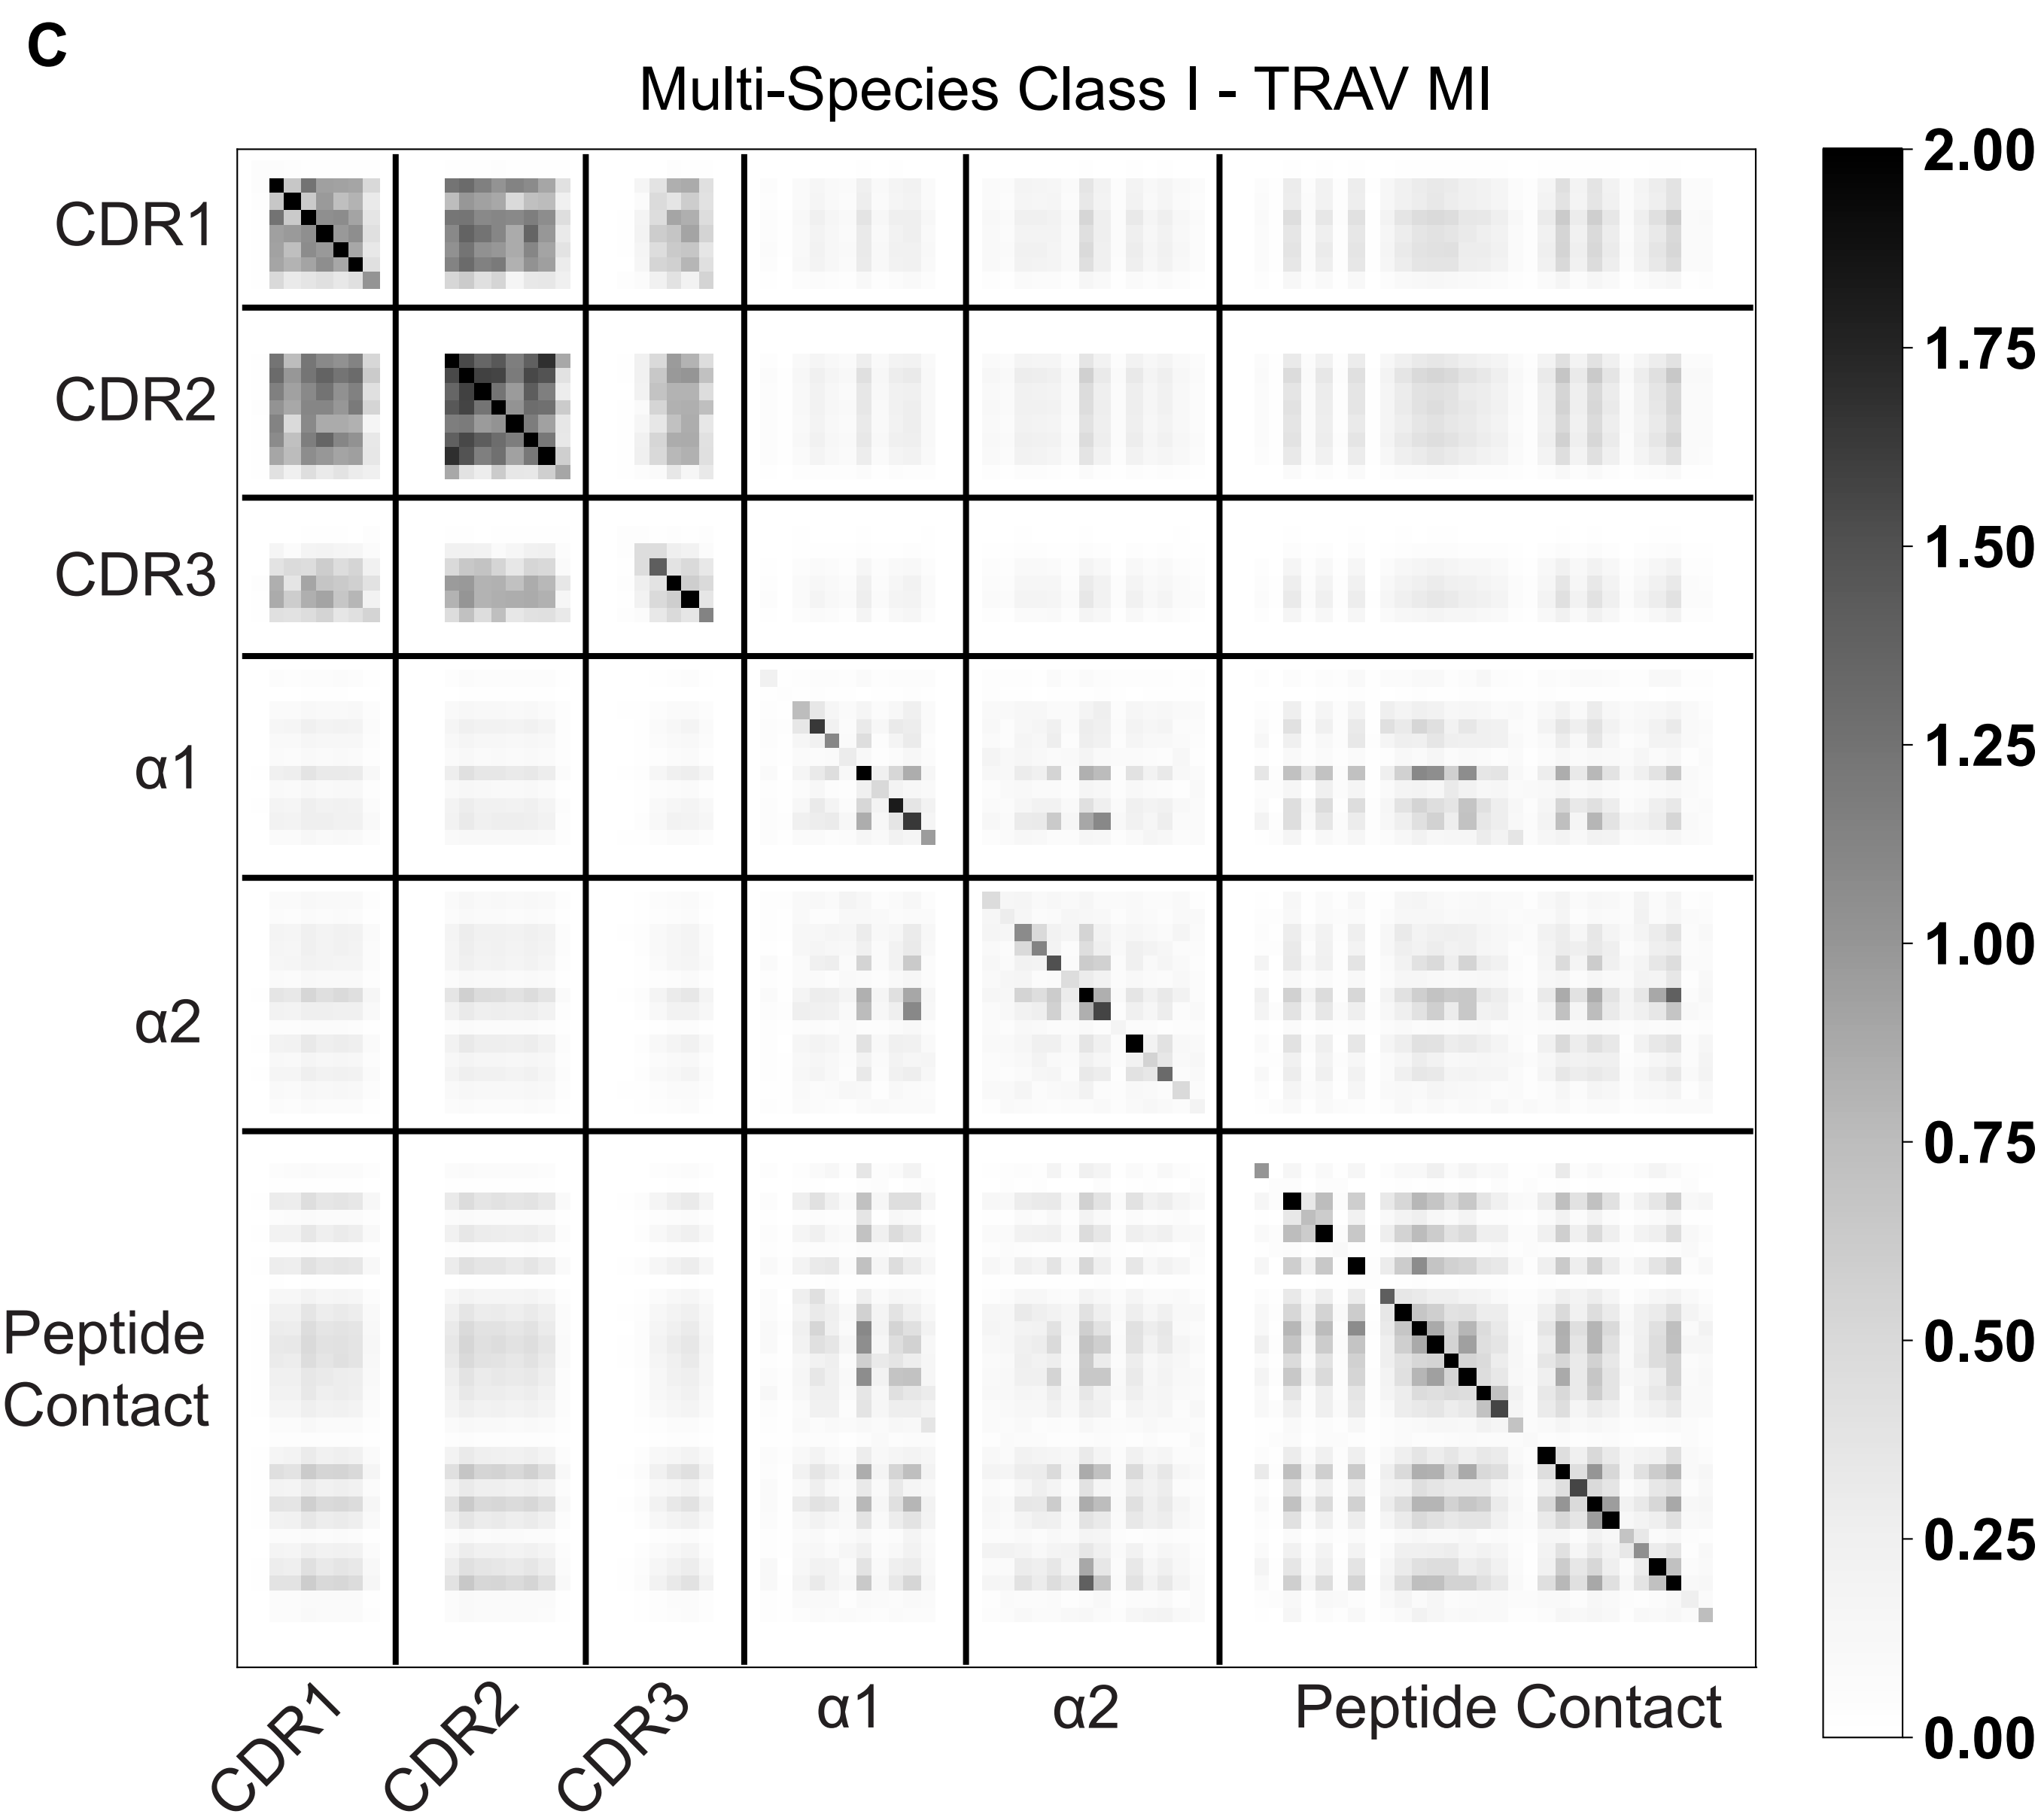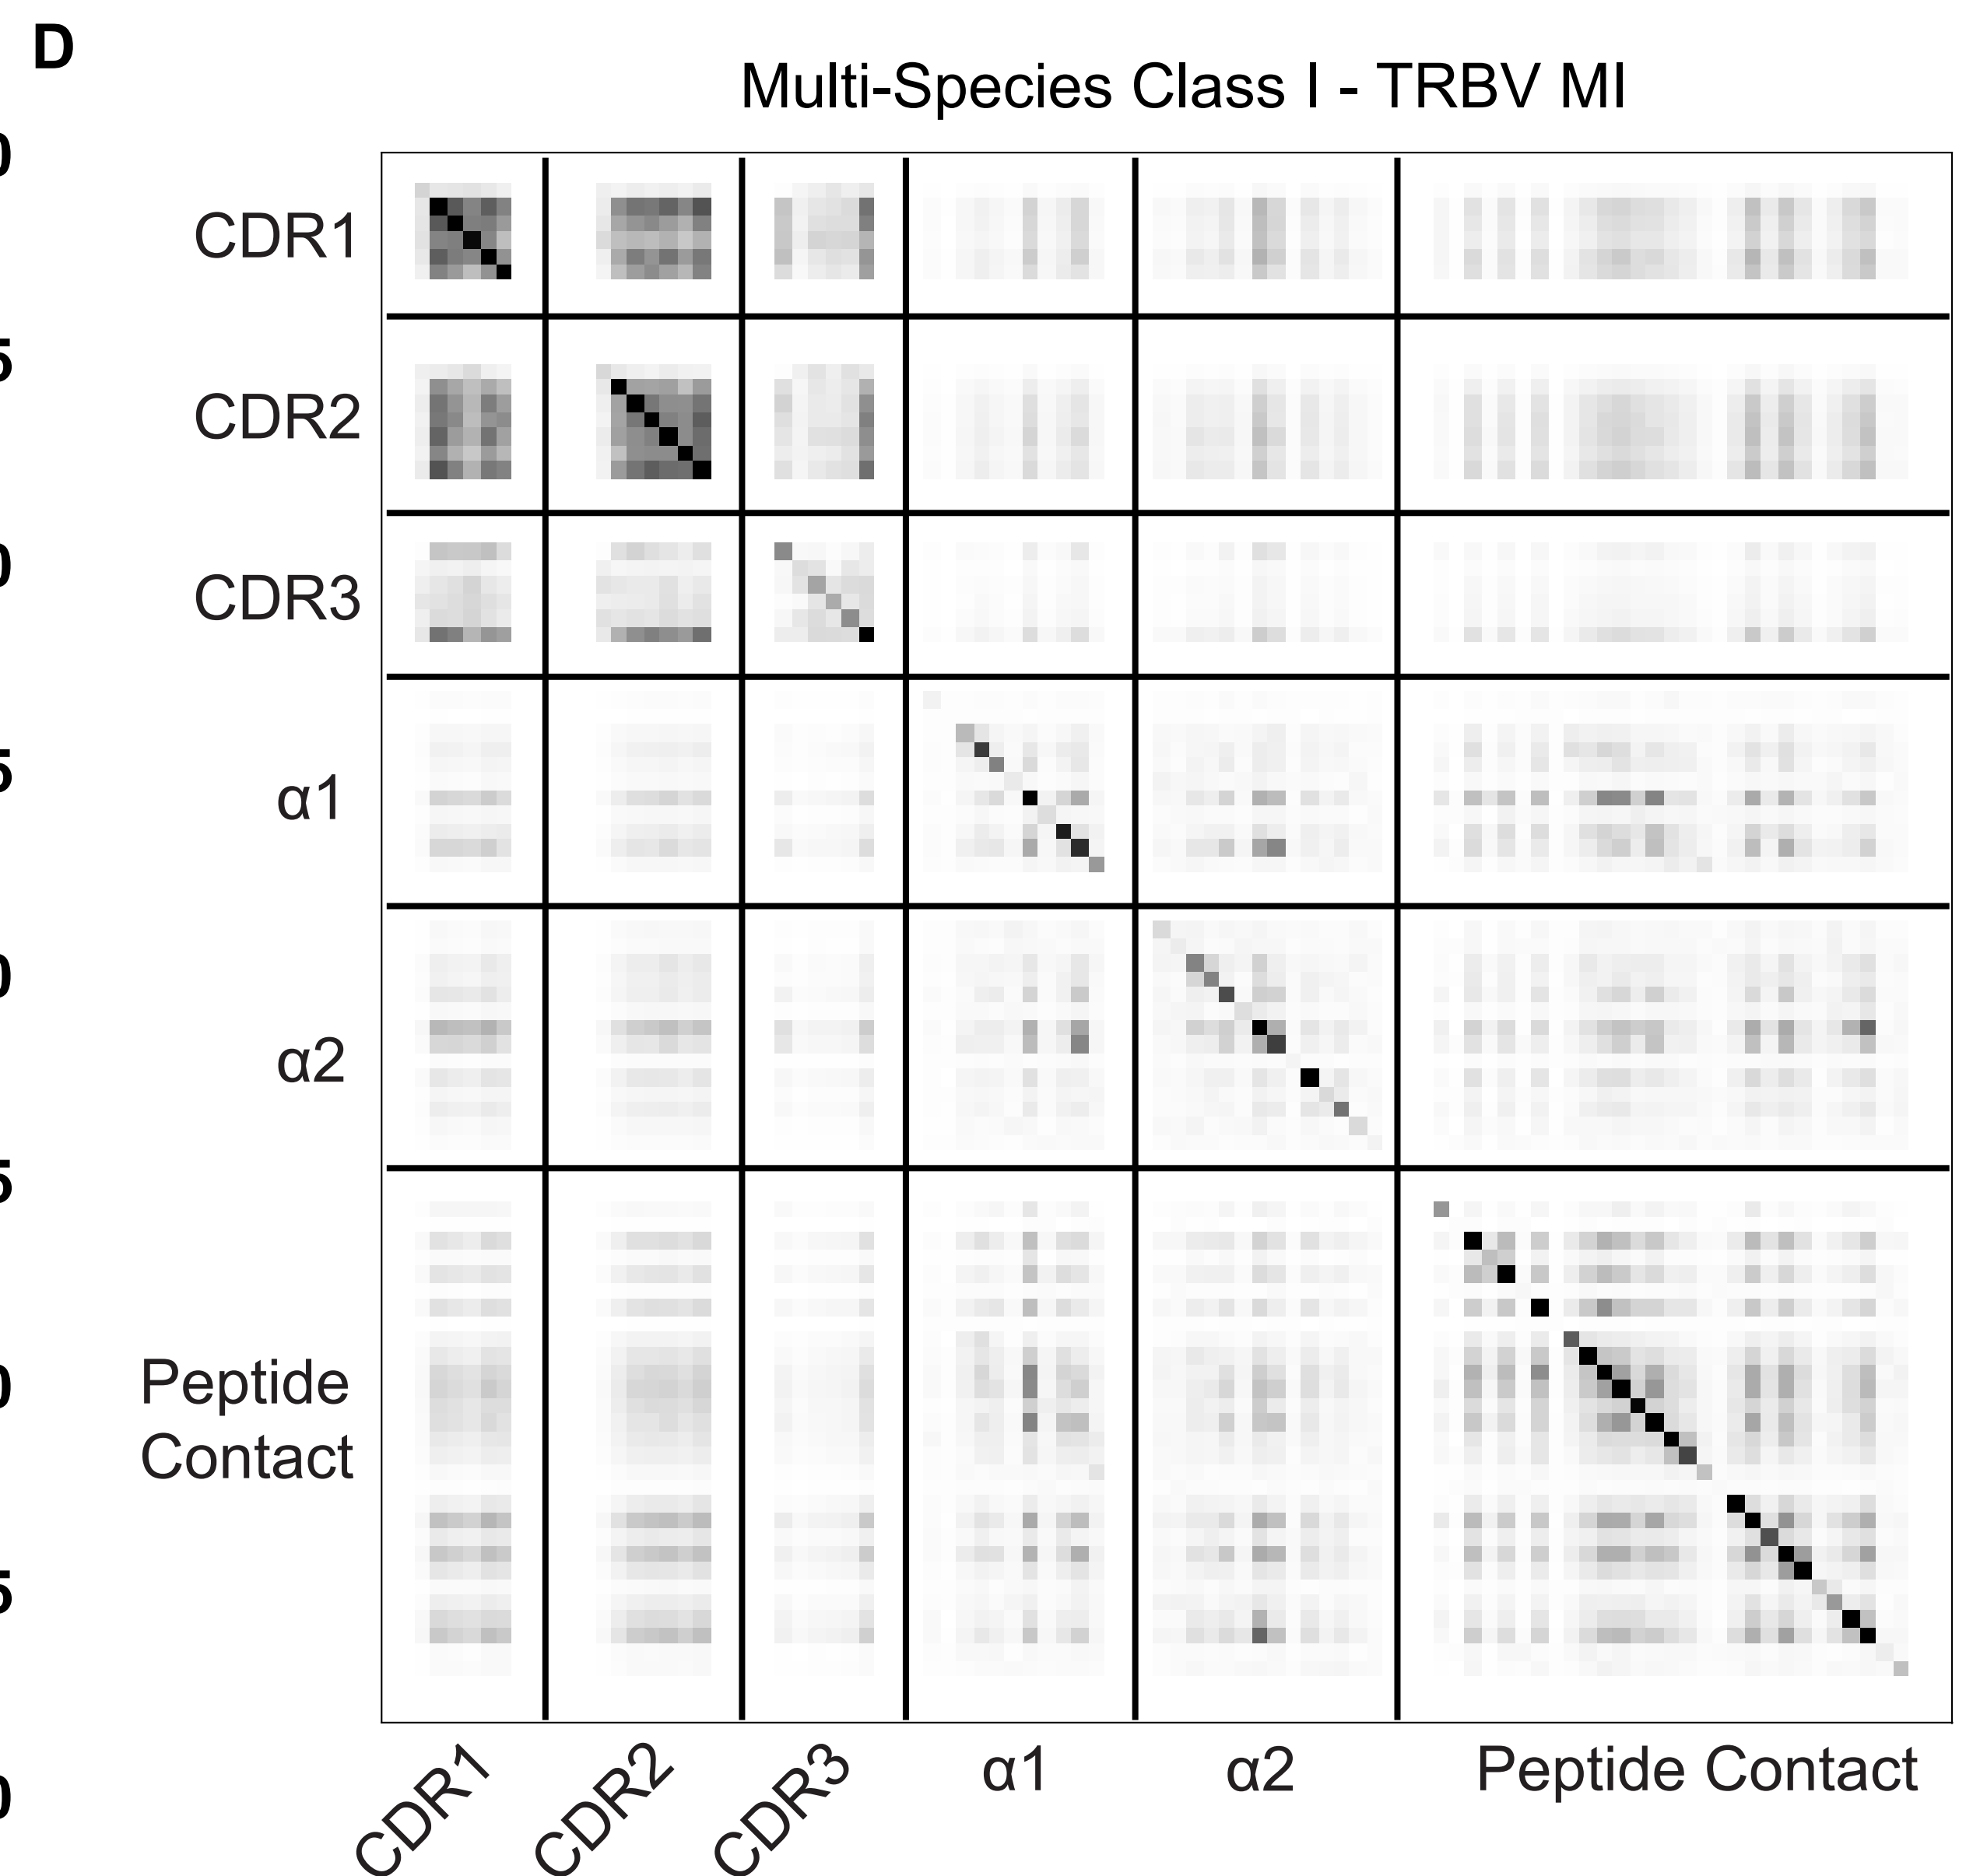

Supplement: supp [file elife-90681-supp-v1.zip]

A

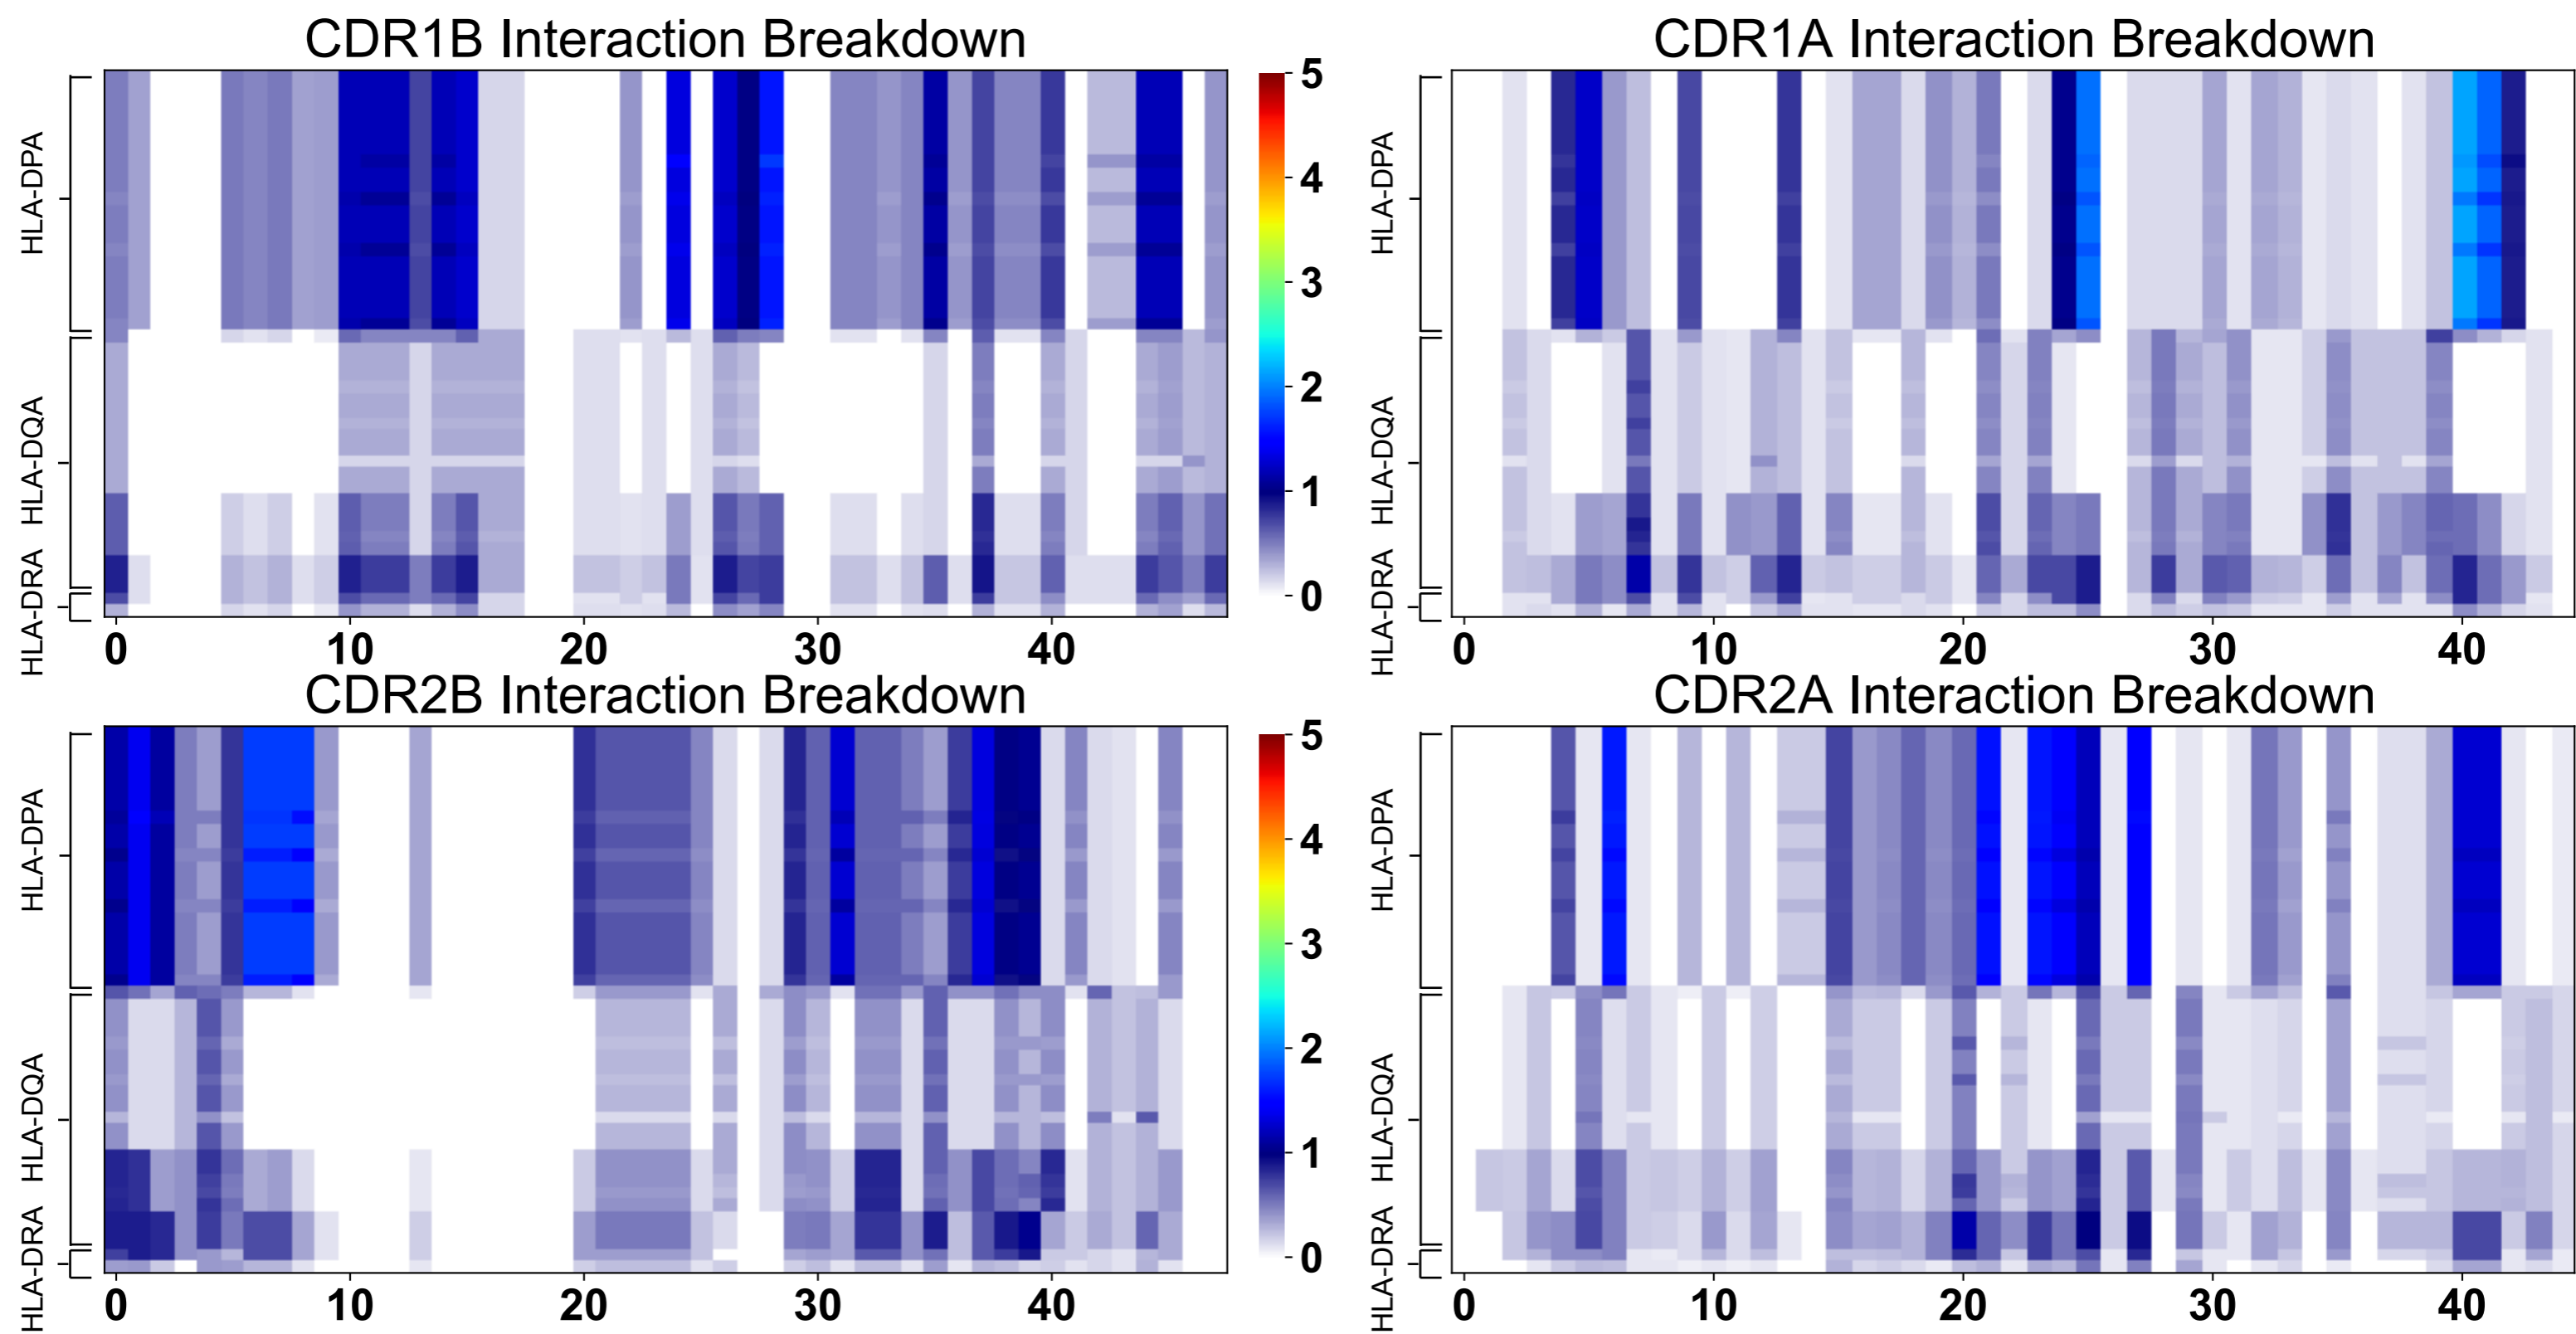

B

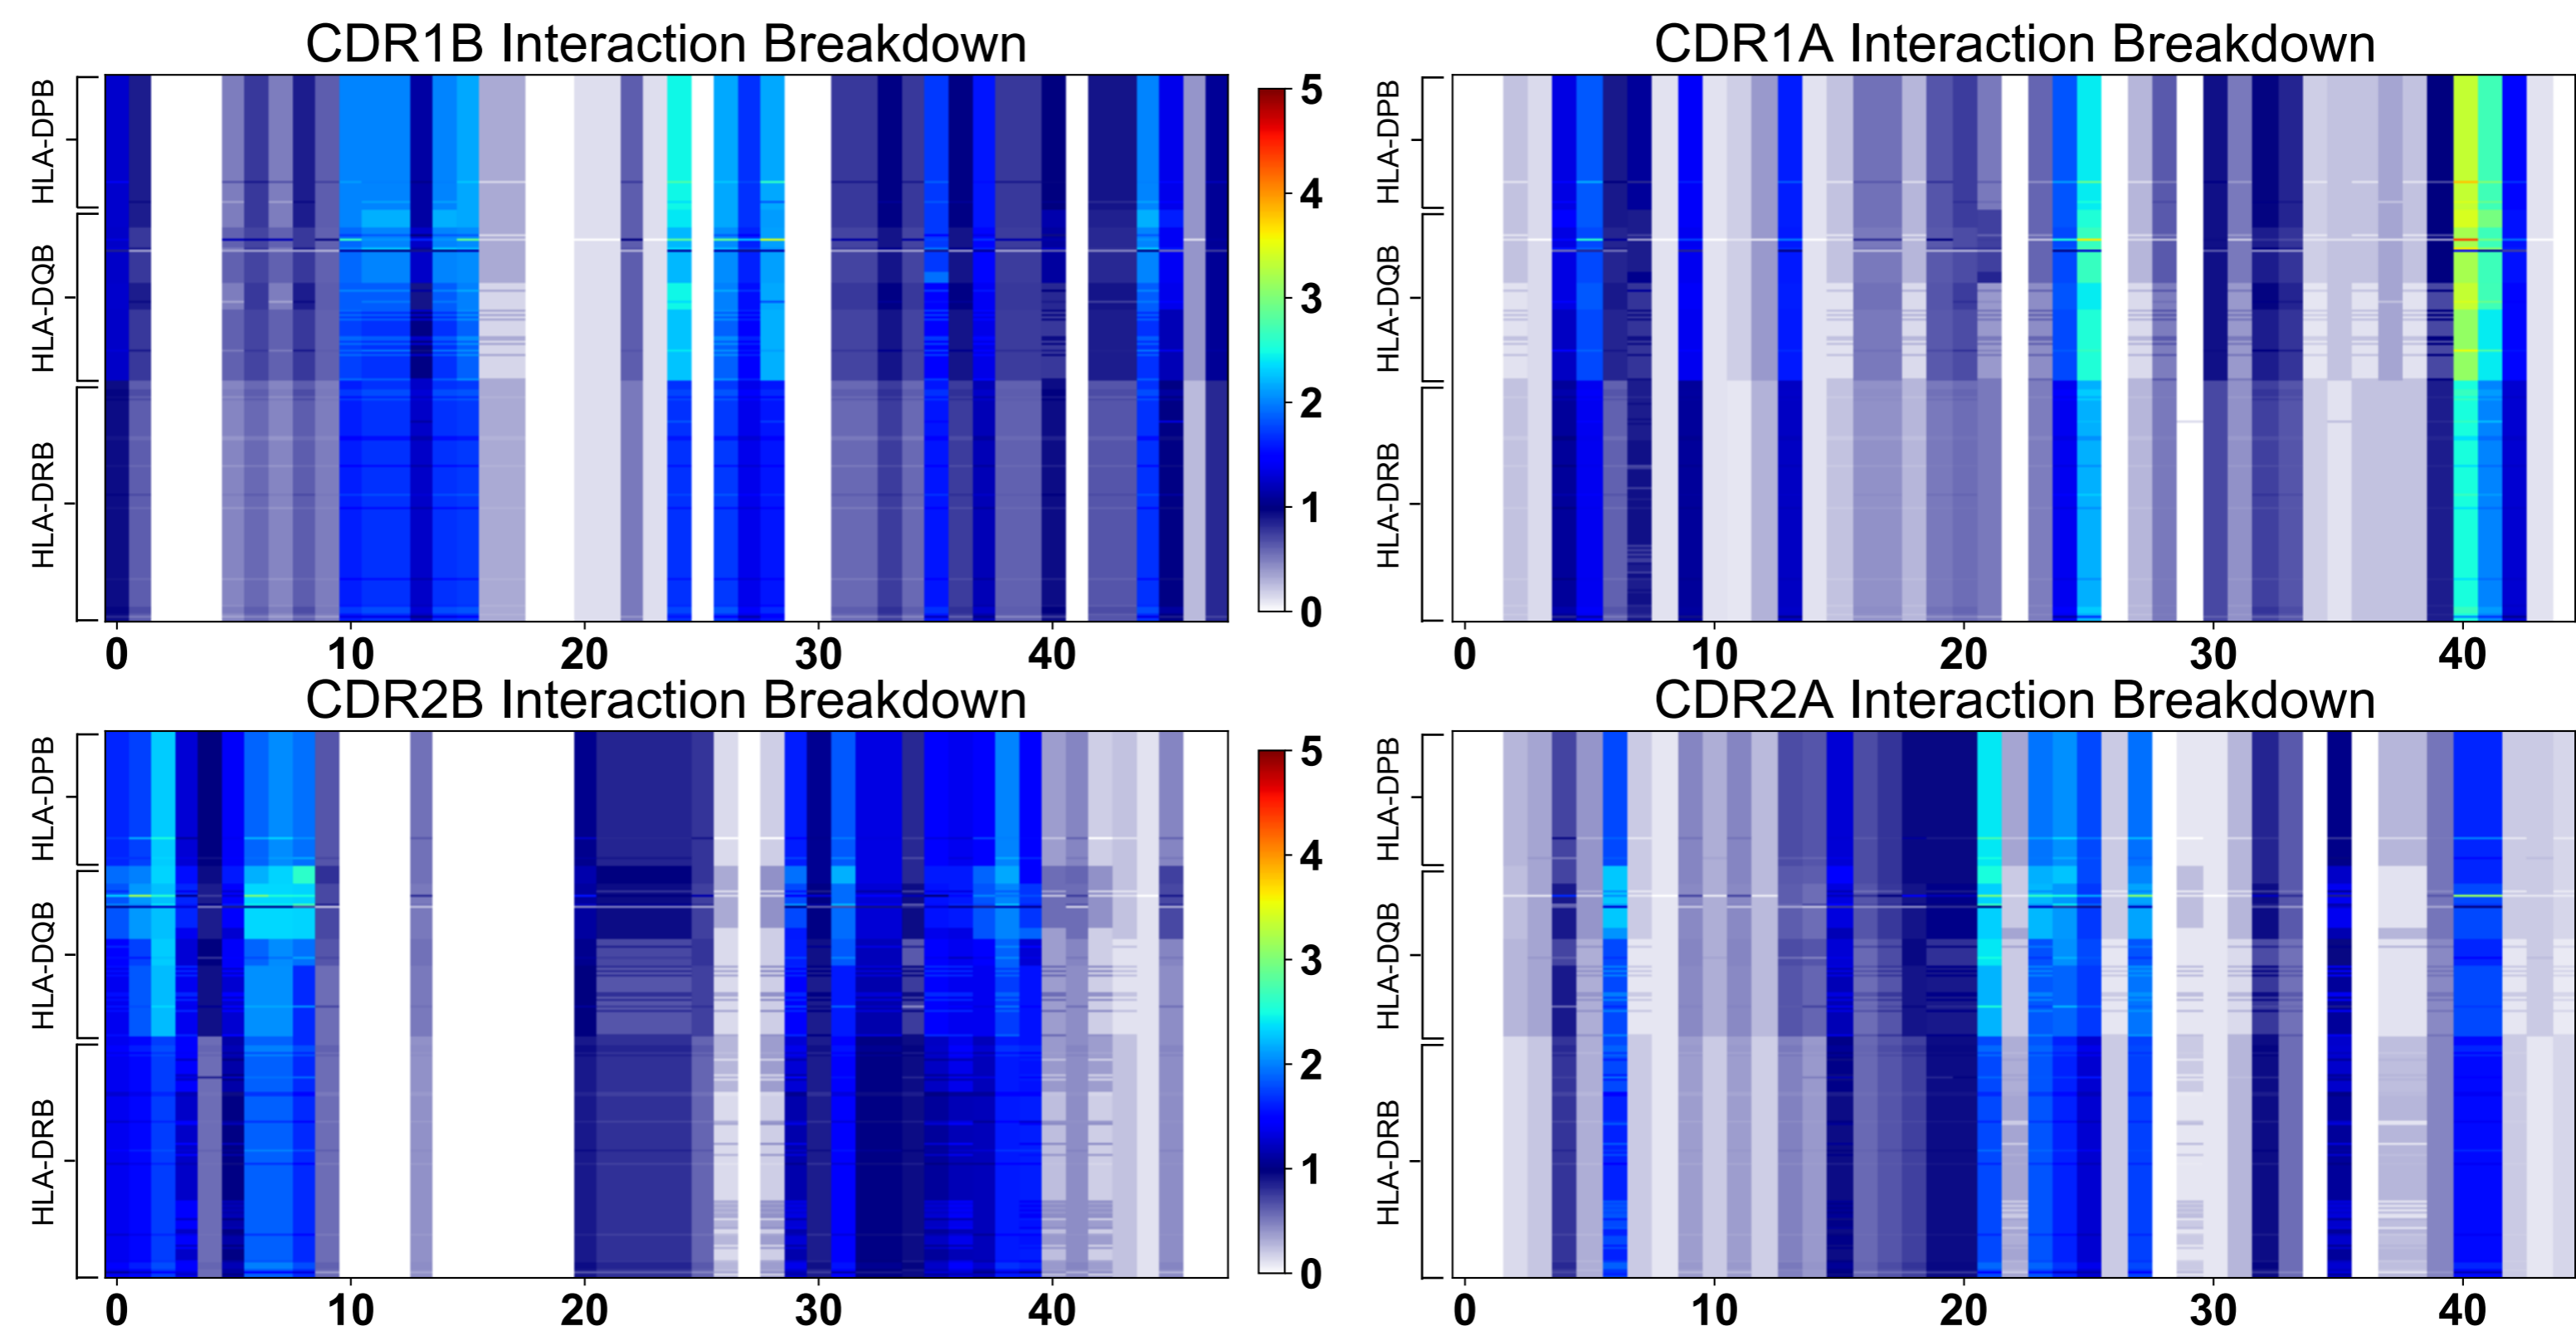

Supplement: supp [file elife-90681-supp-v1.zip]

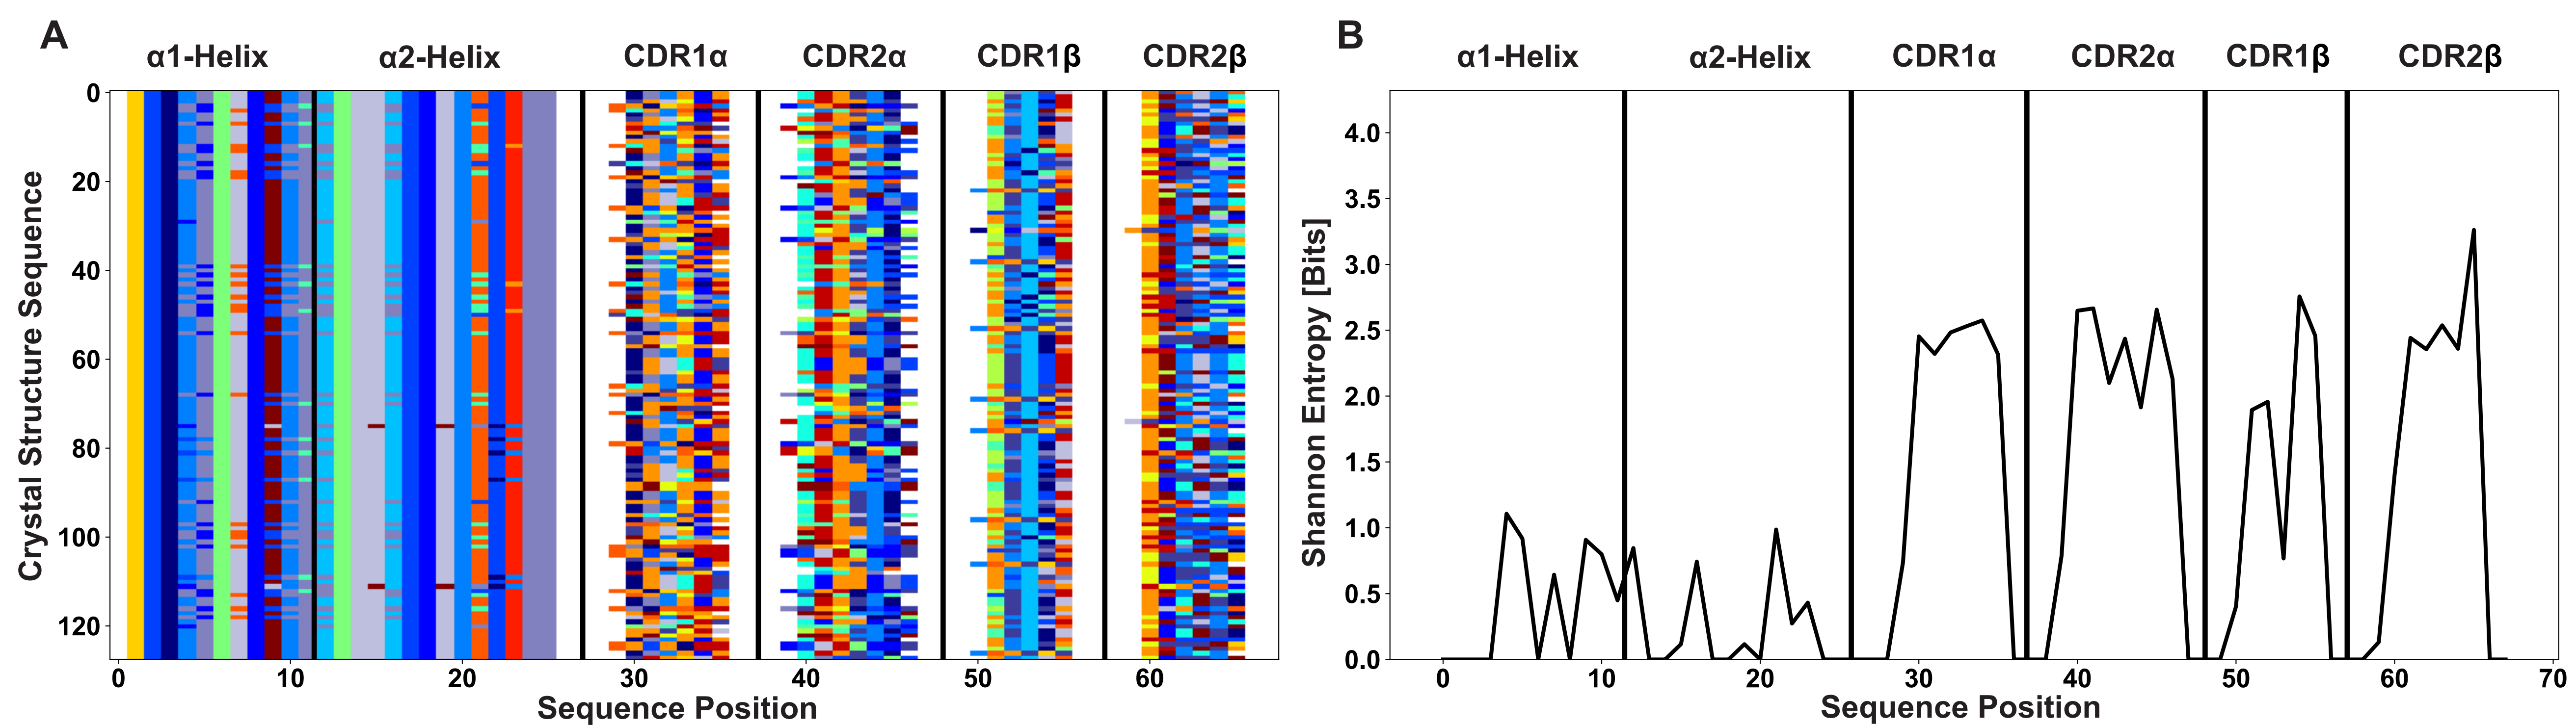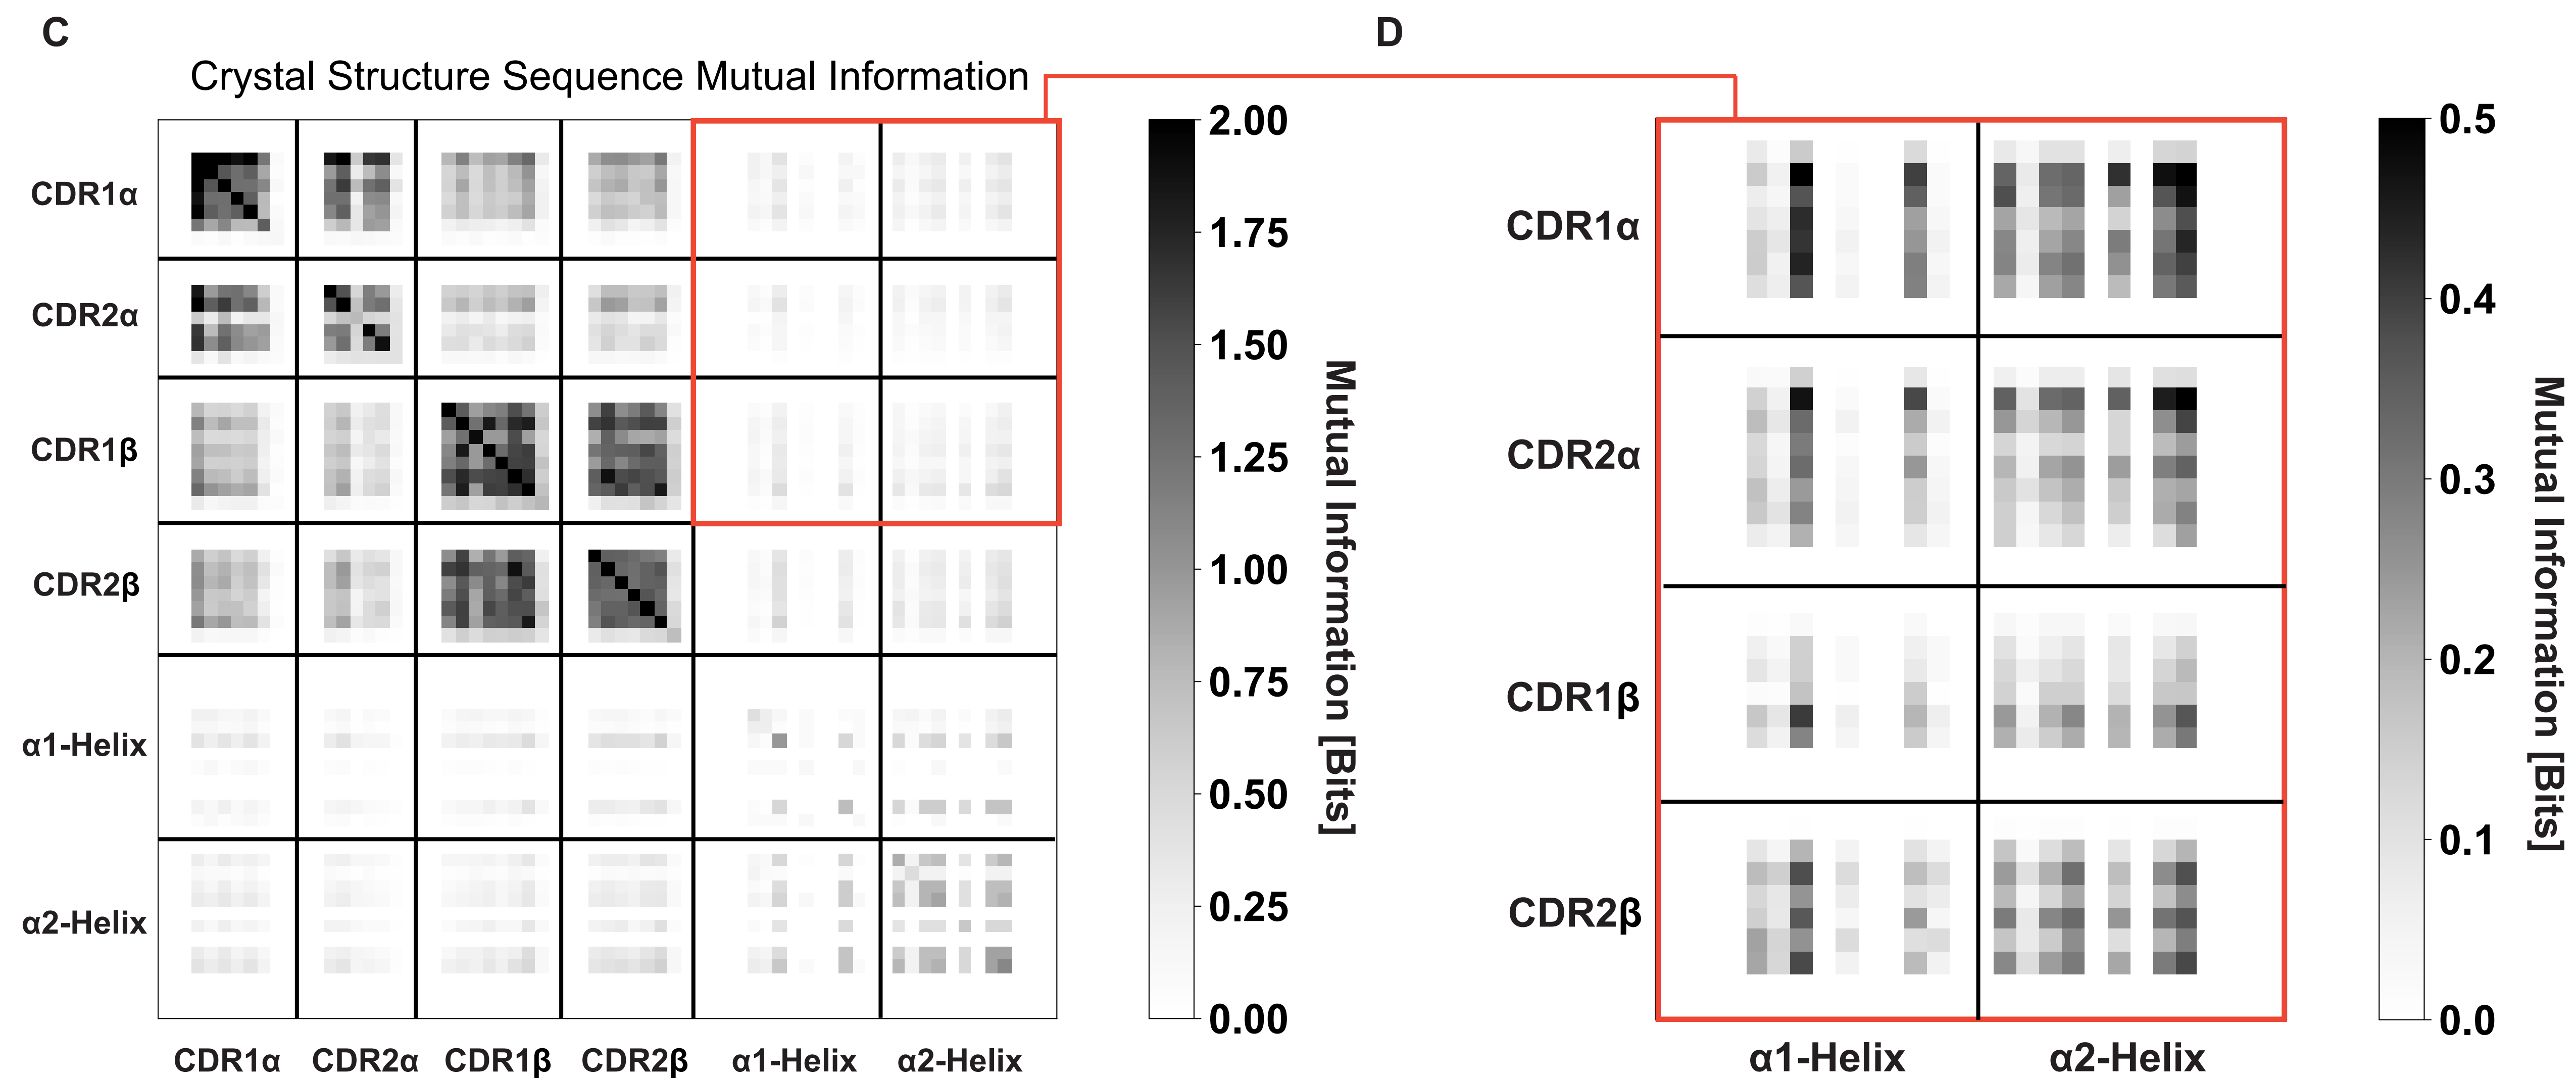

Supplement: supp [file elife-90681-supp-v1.zip]

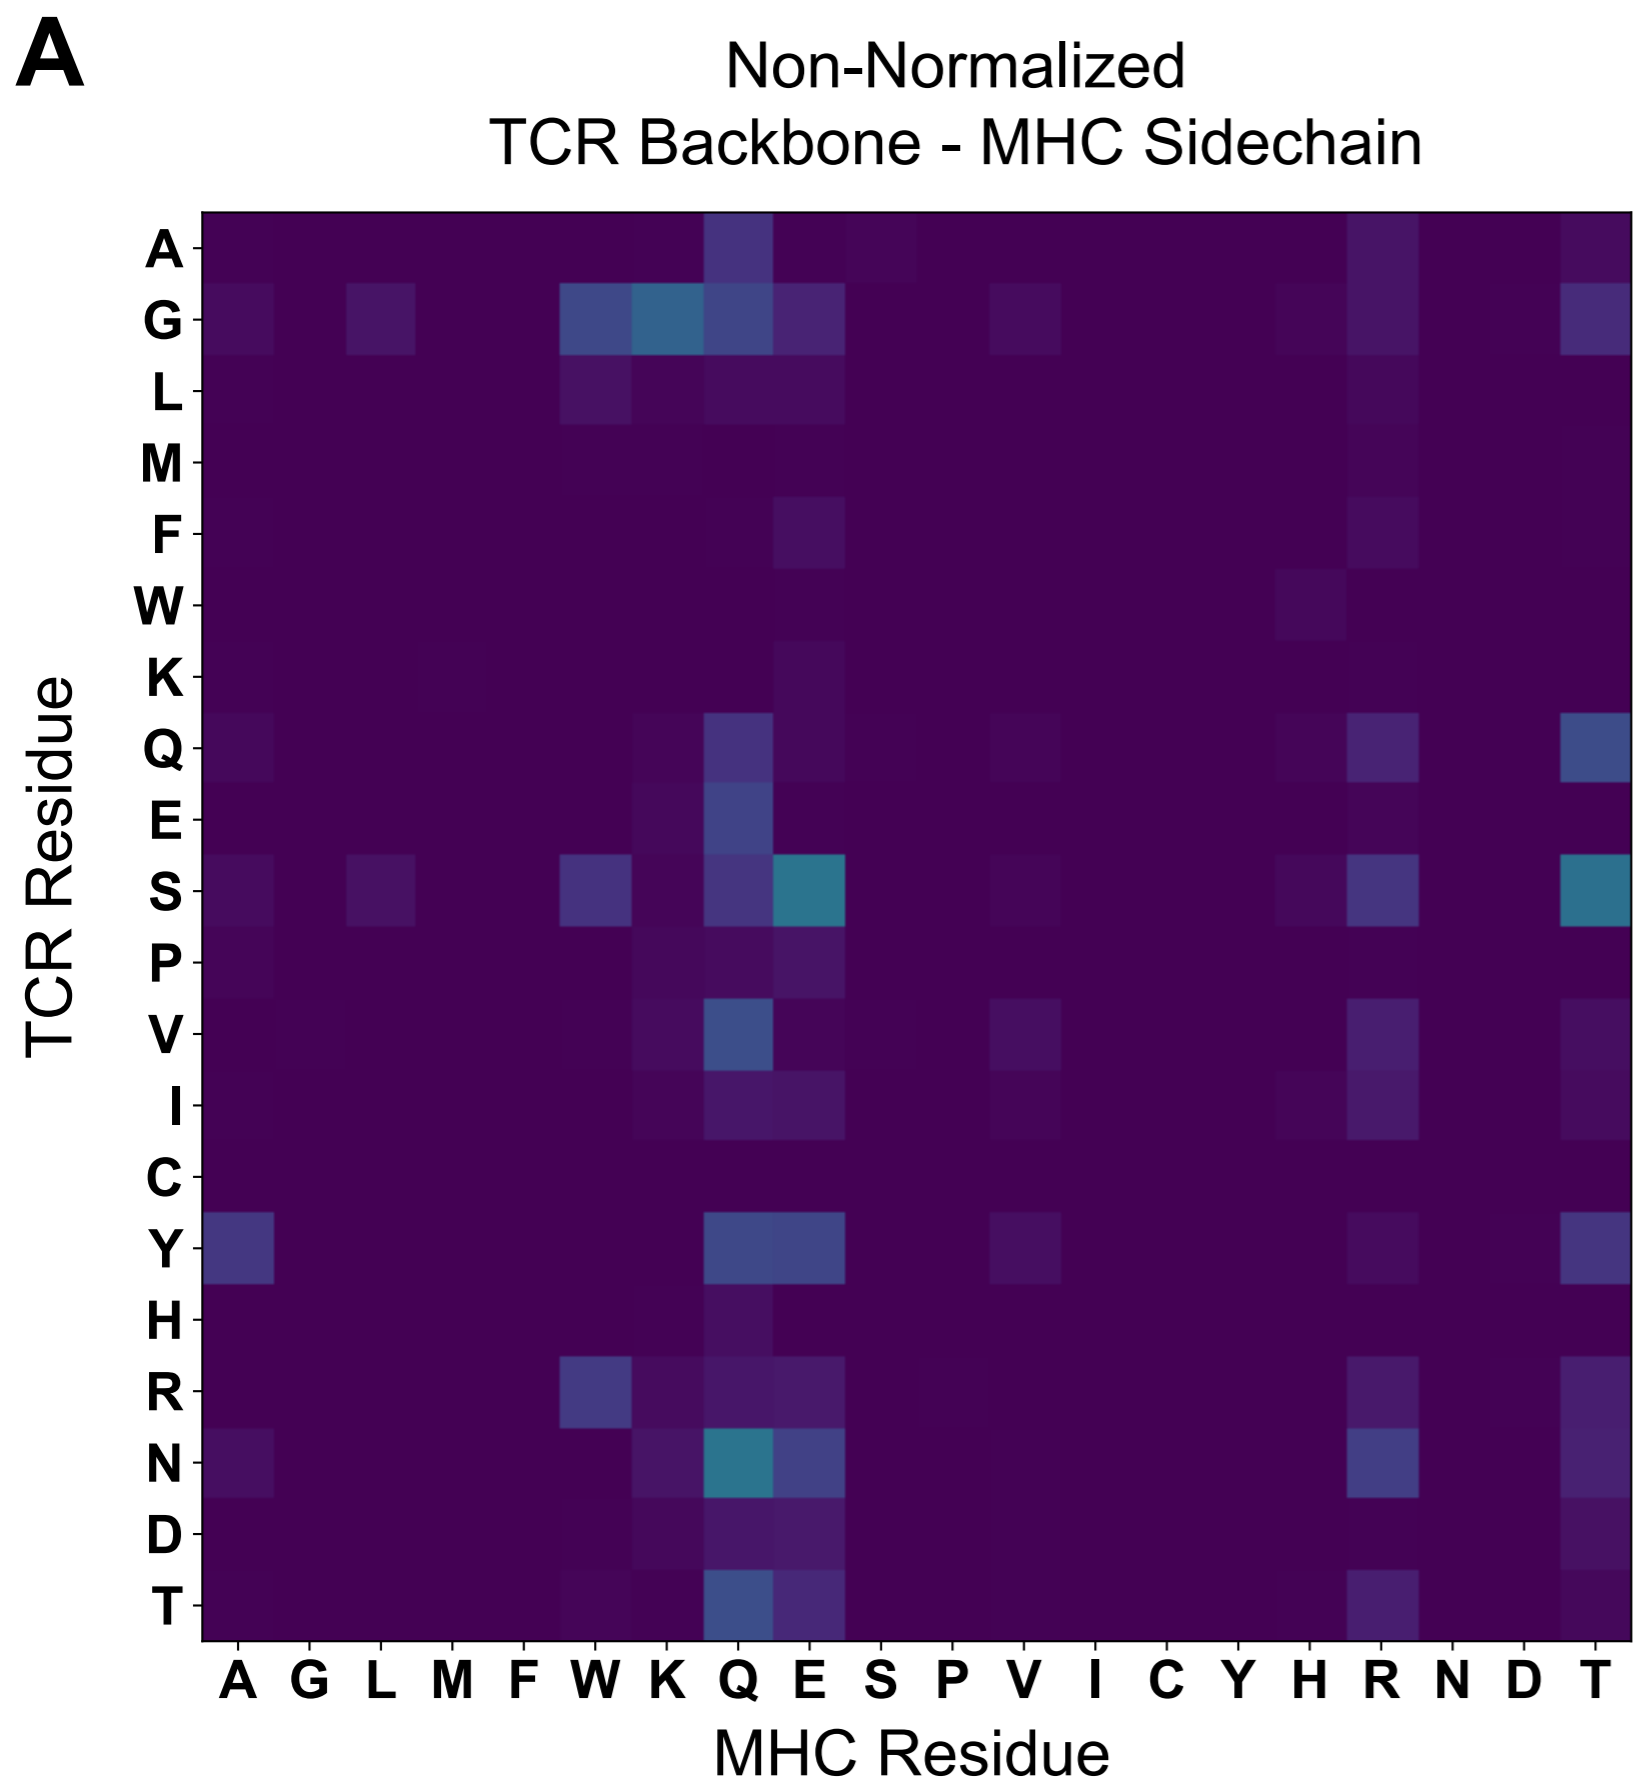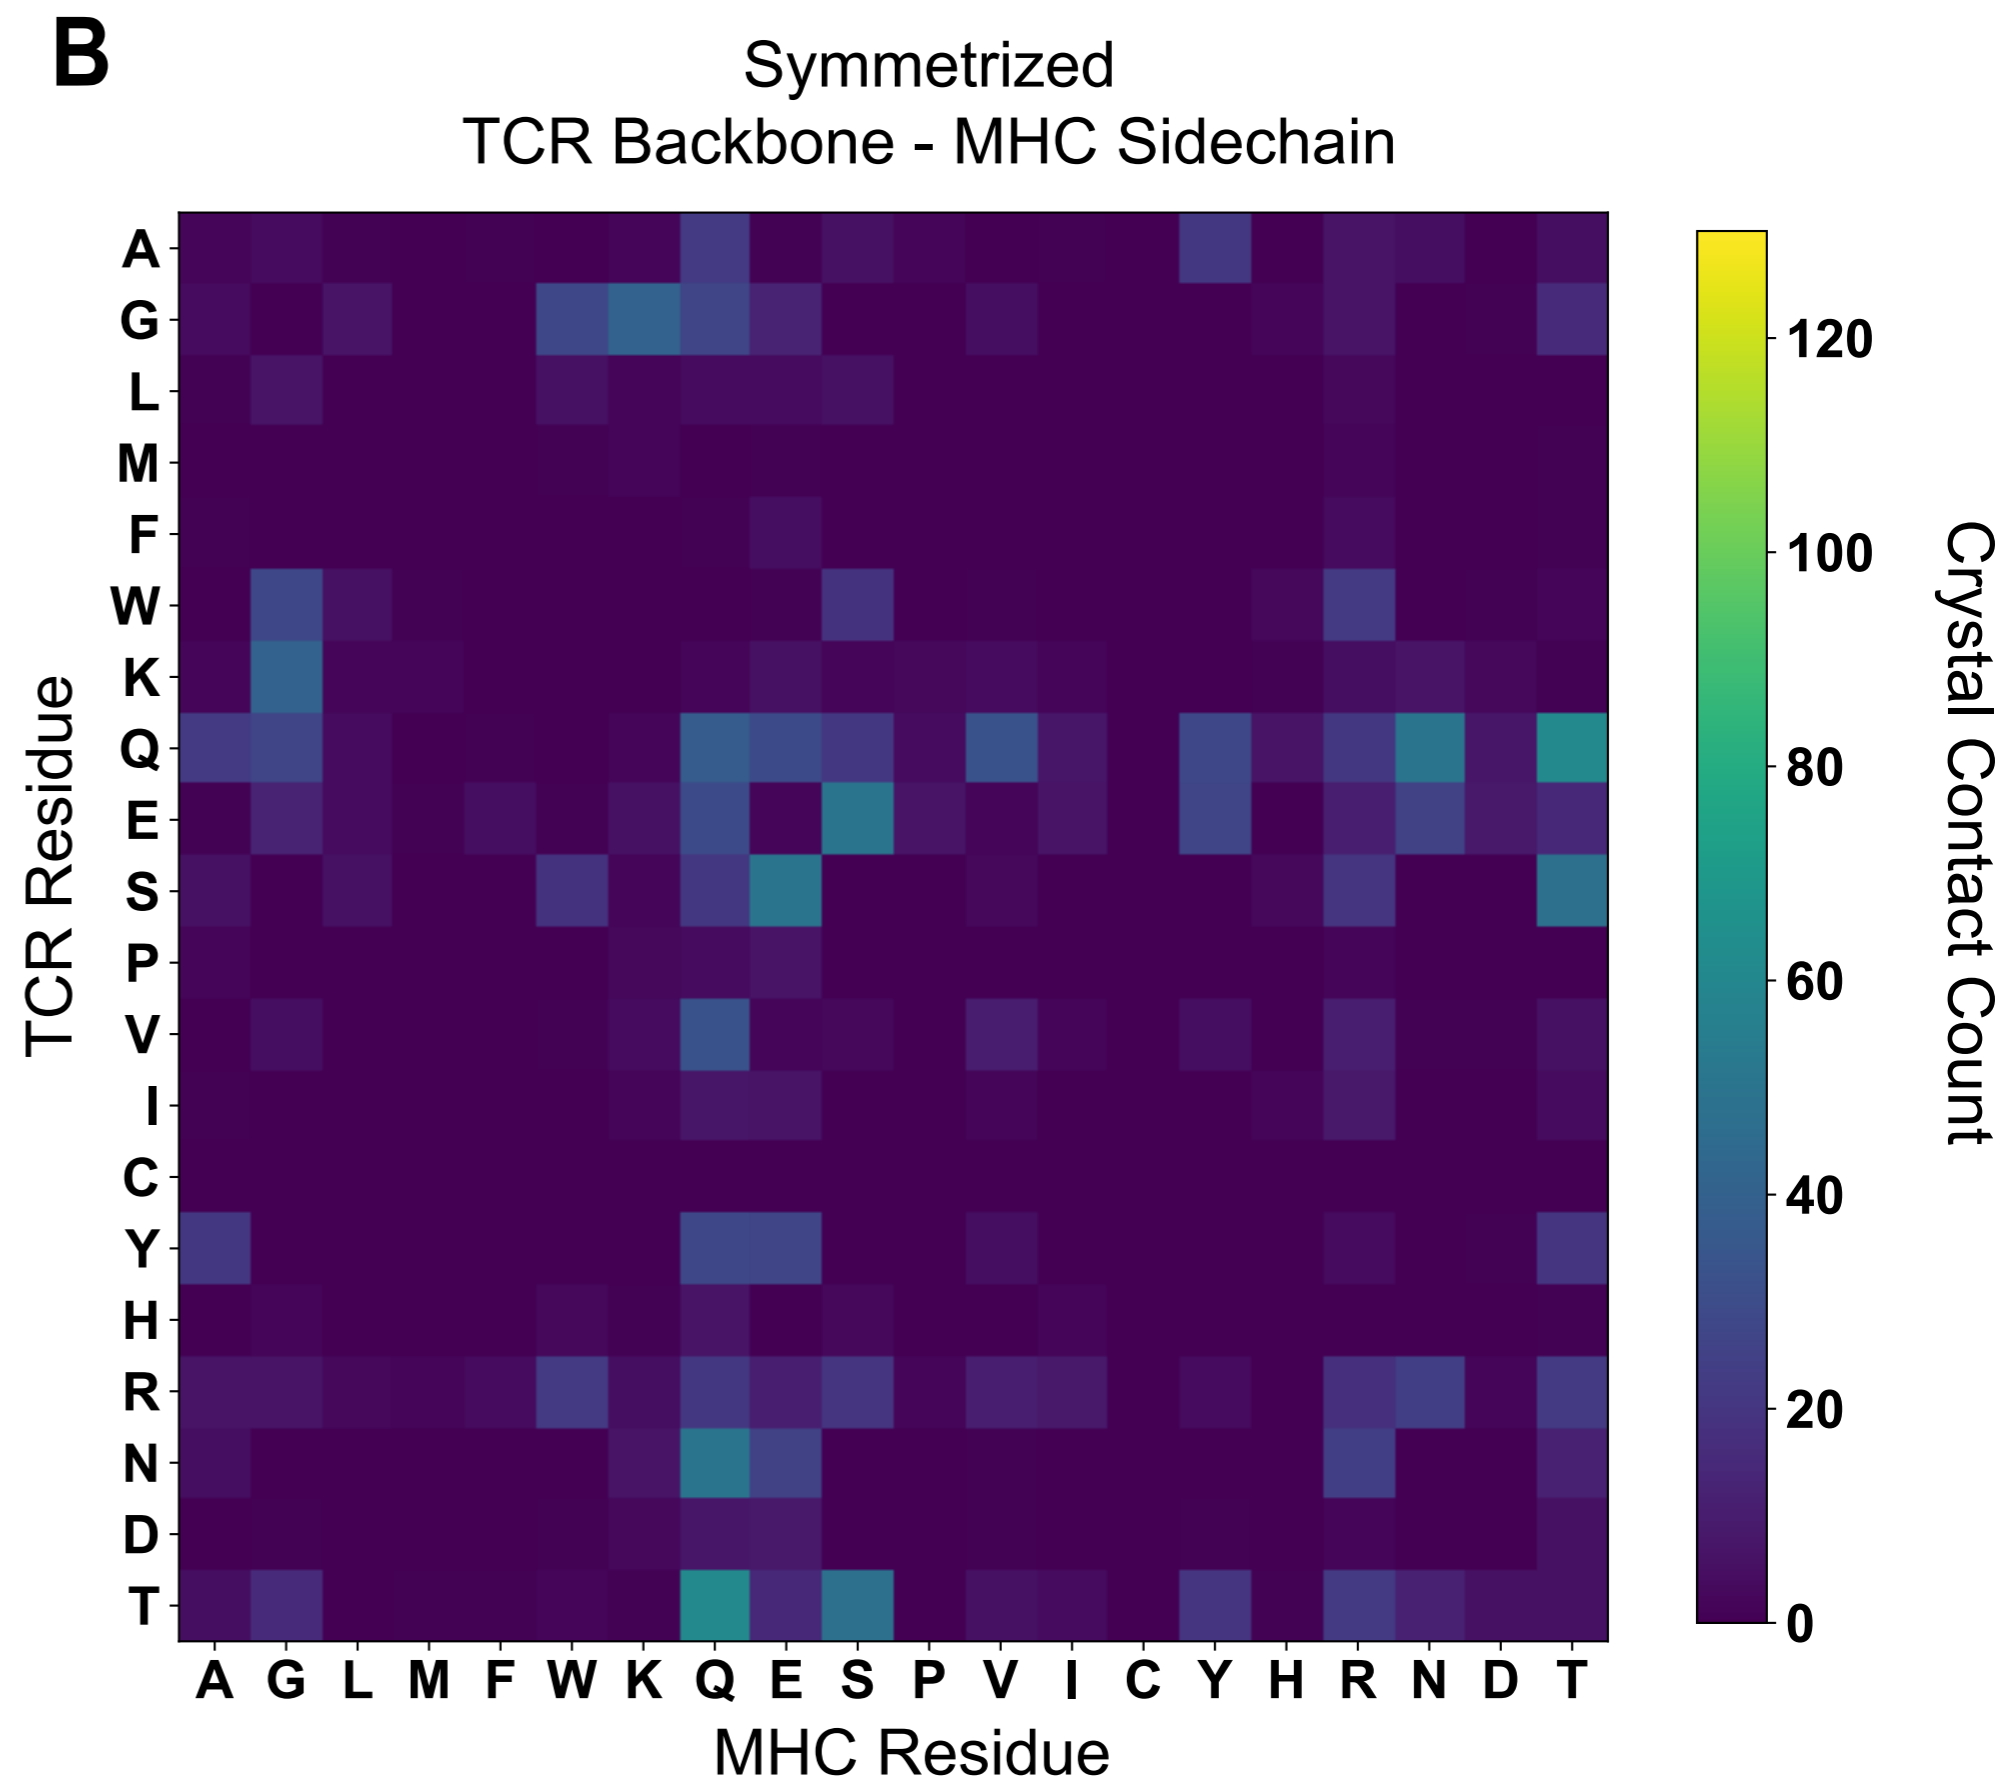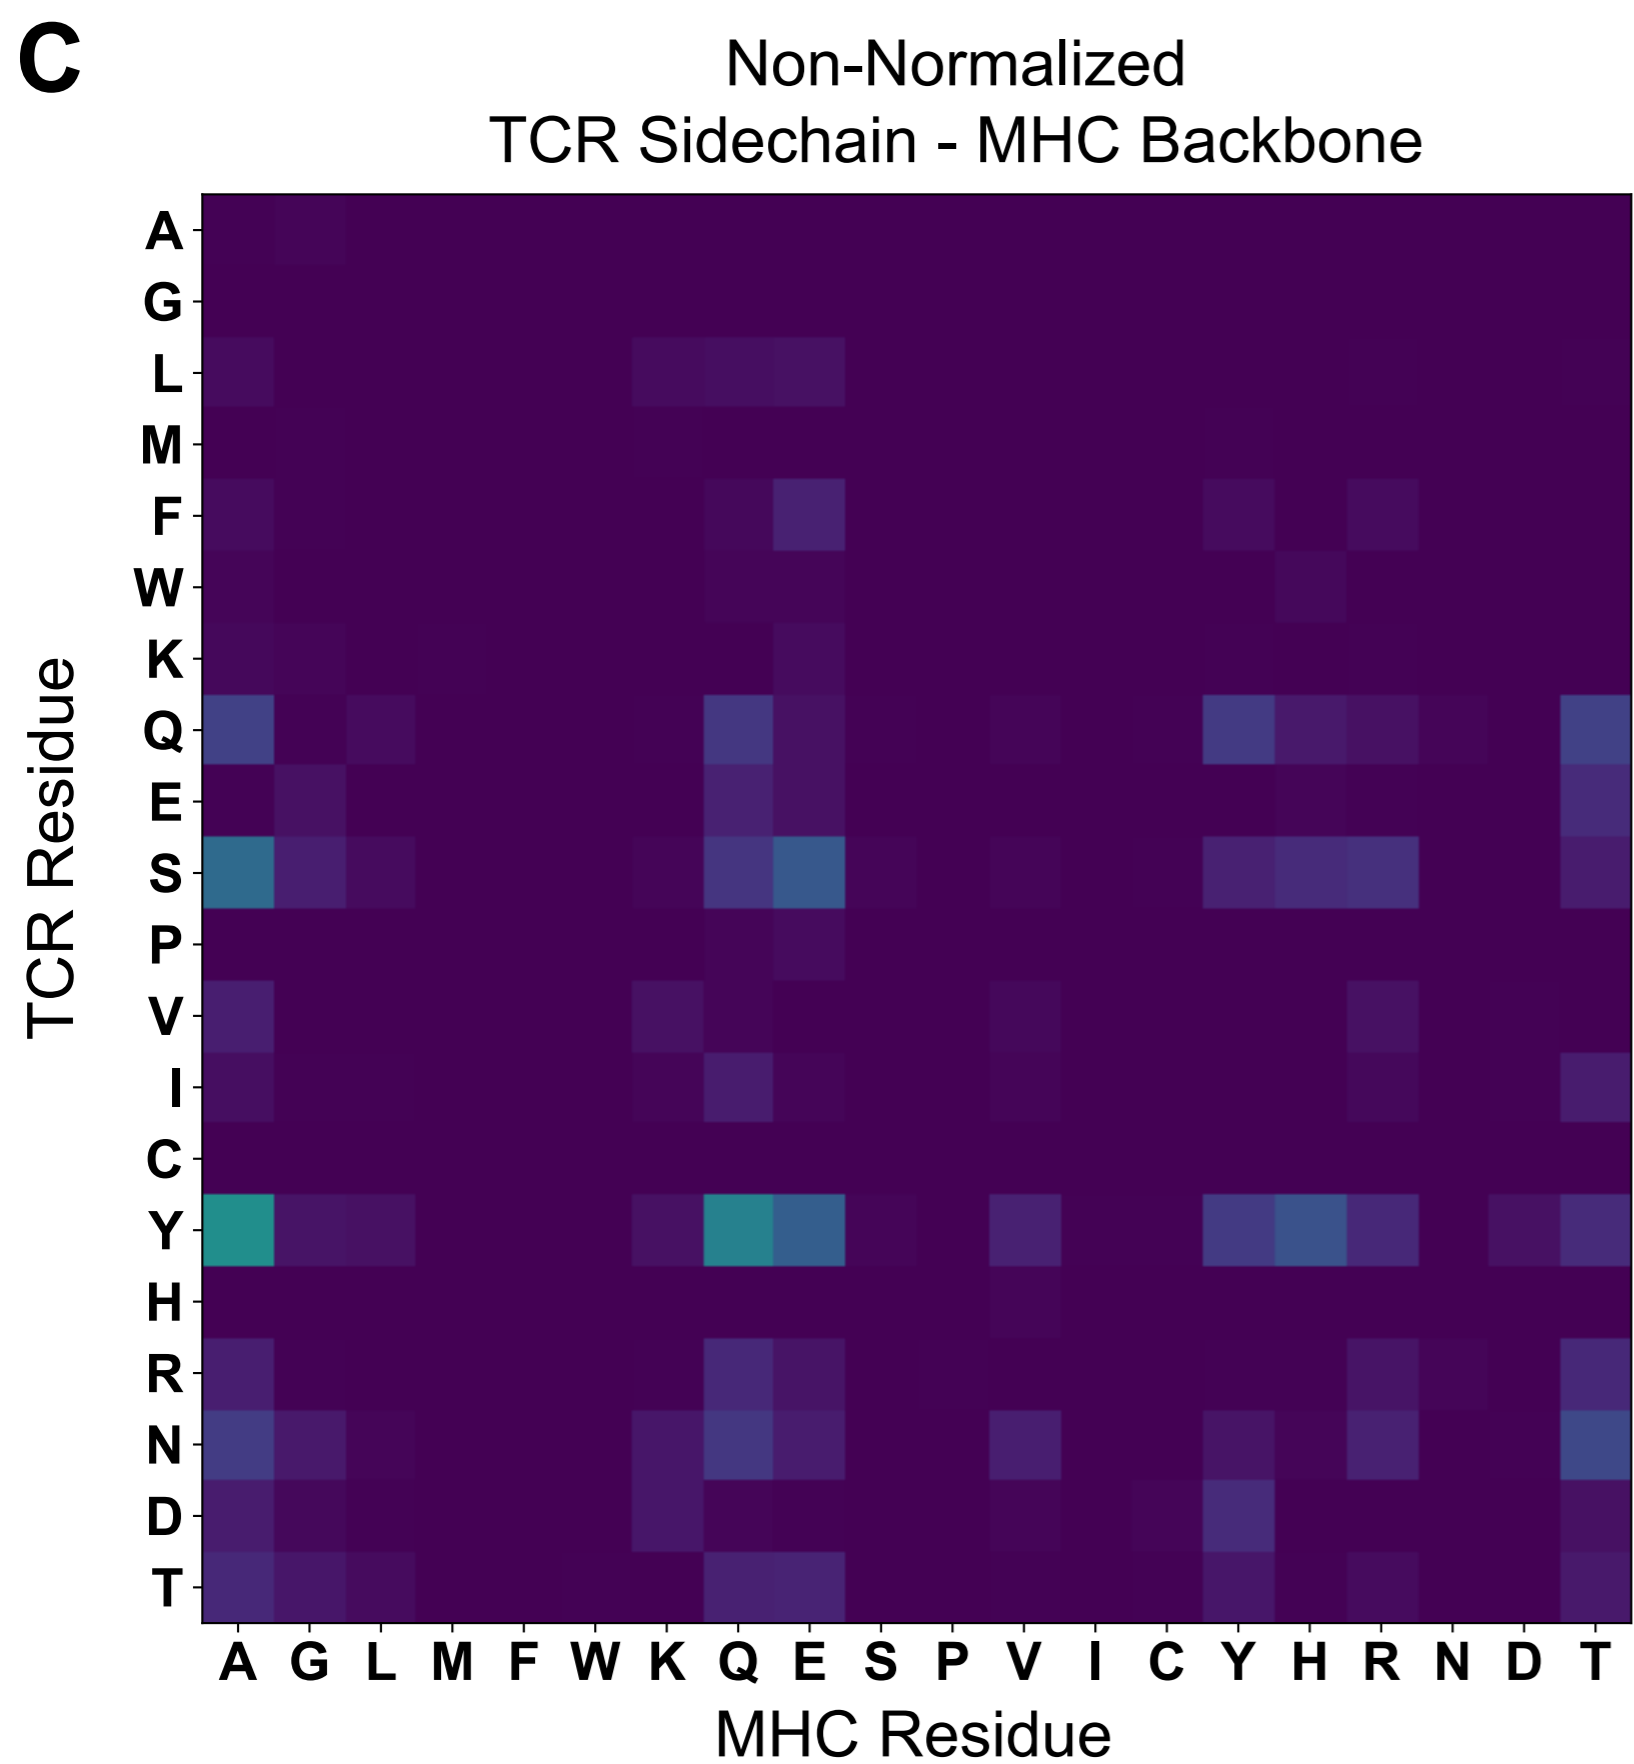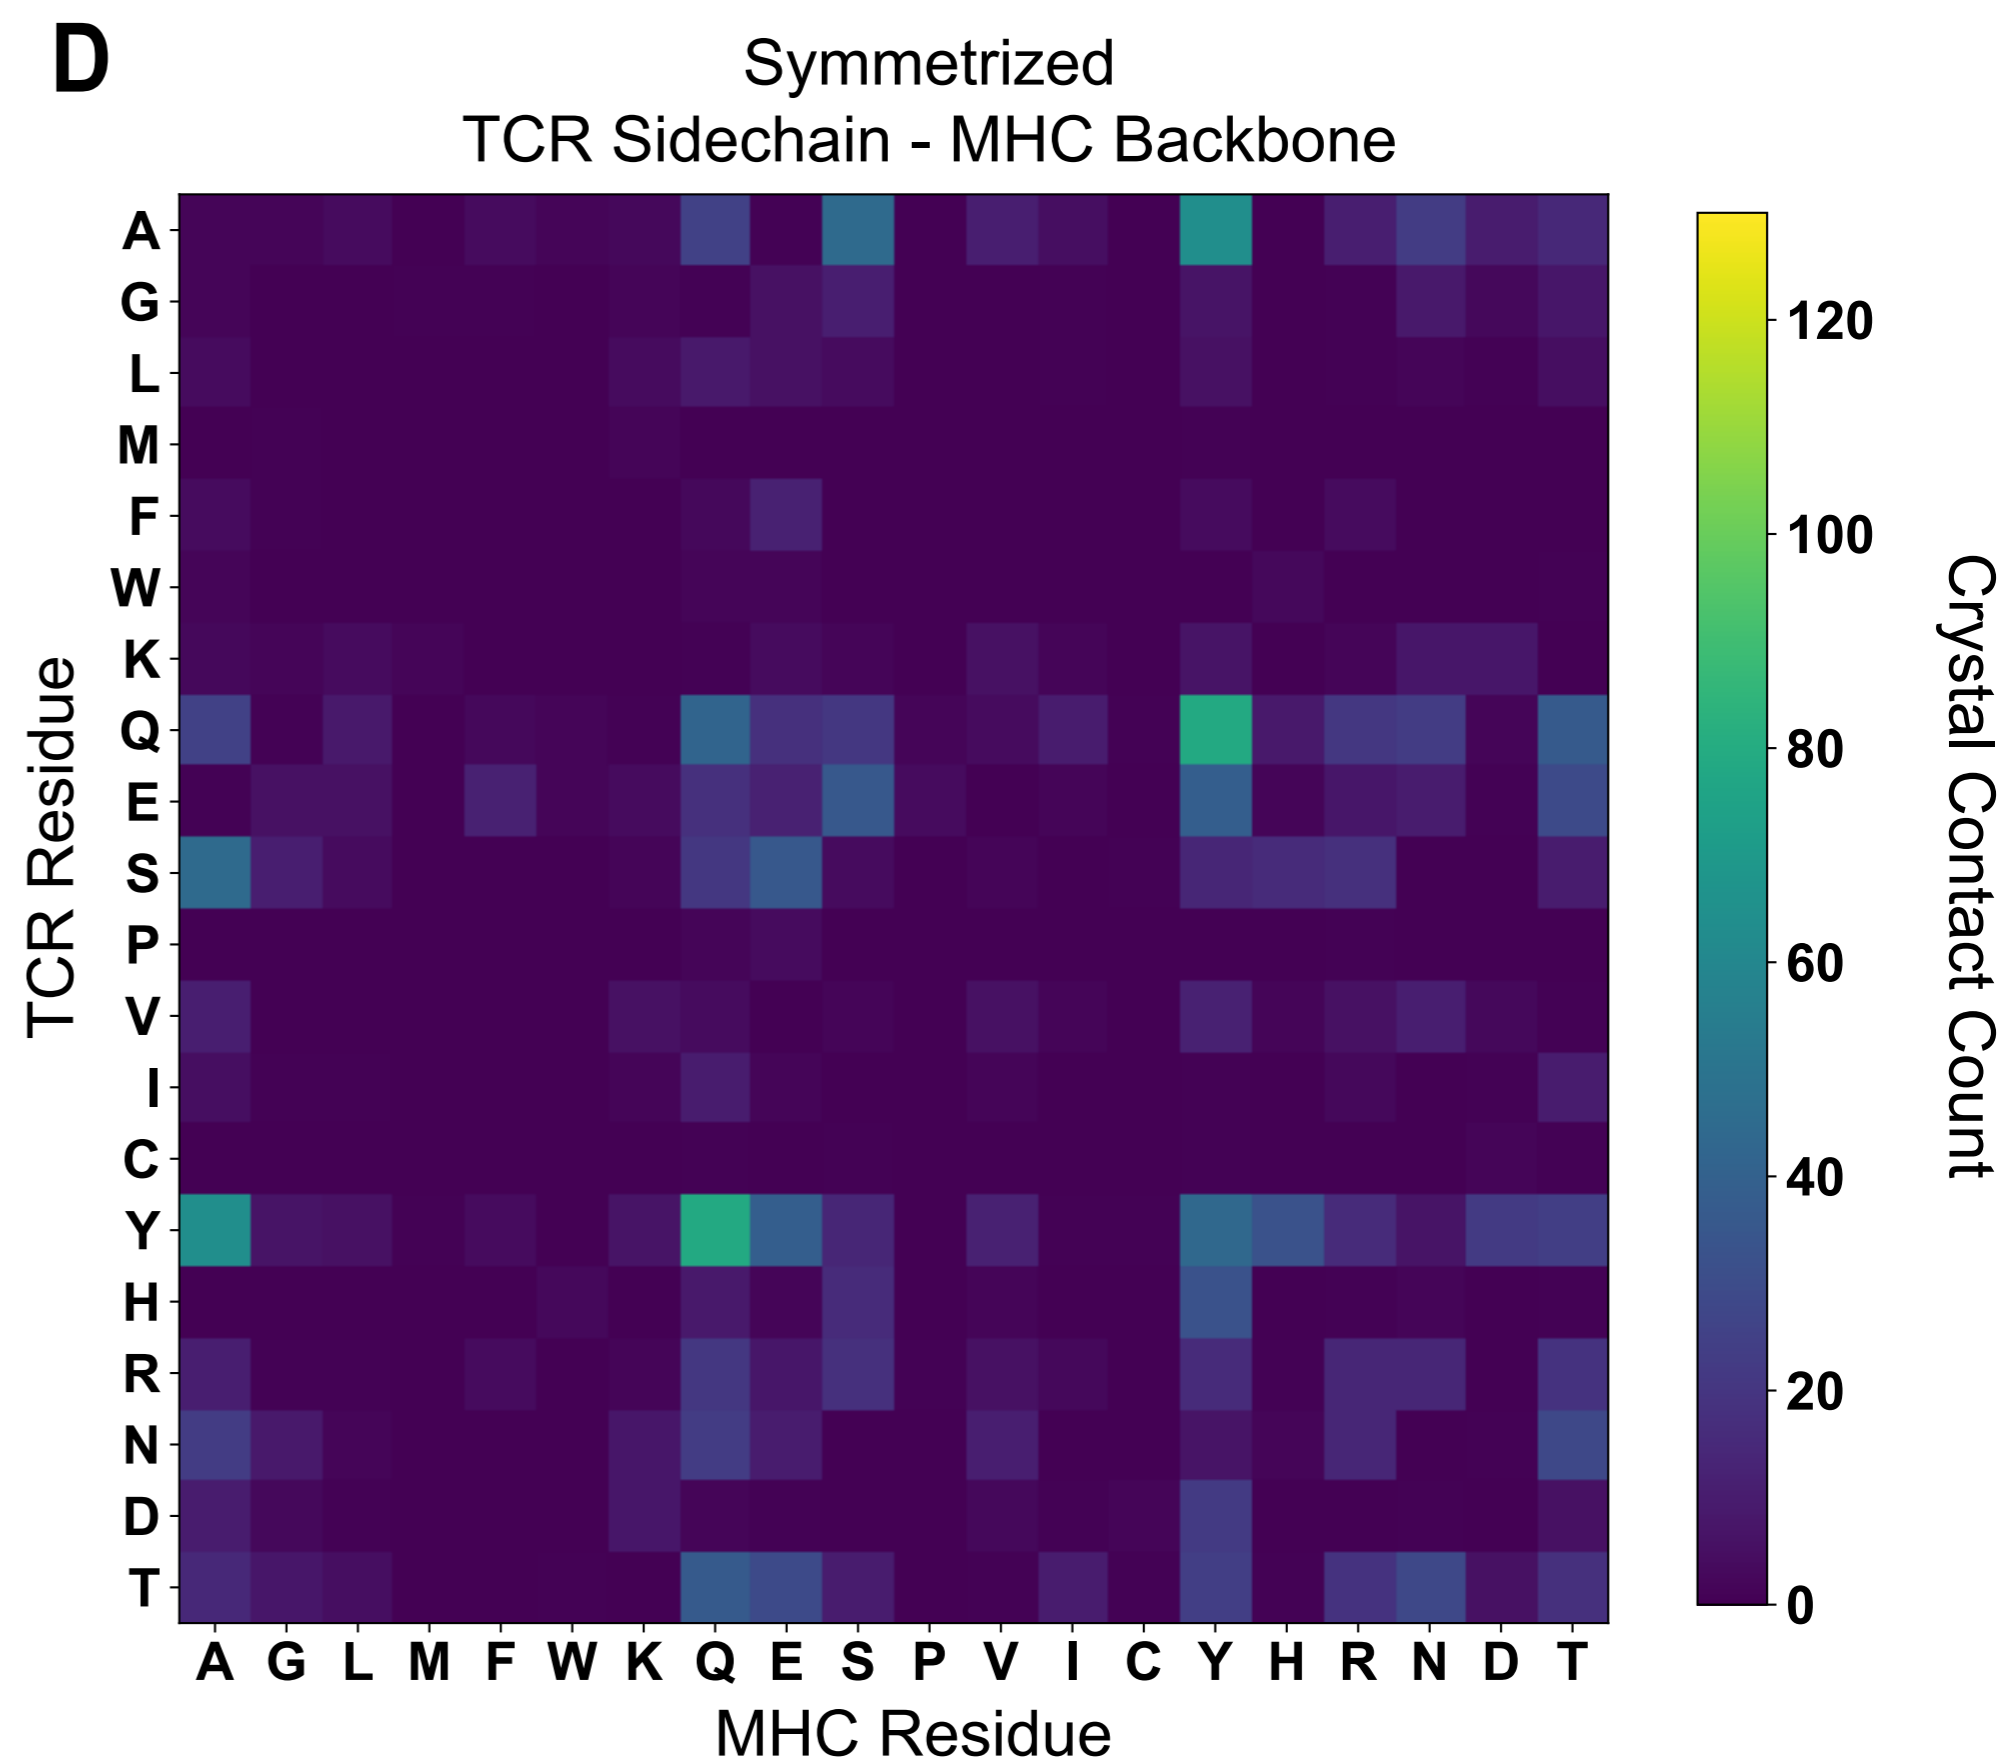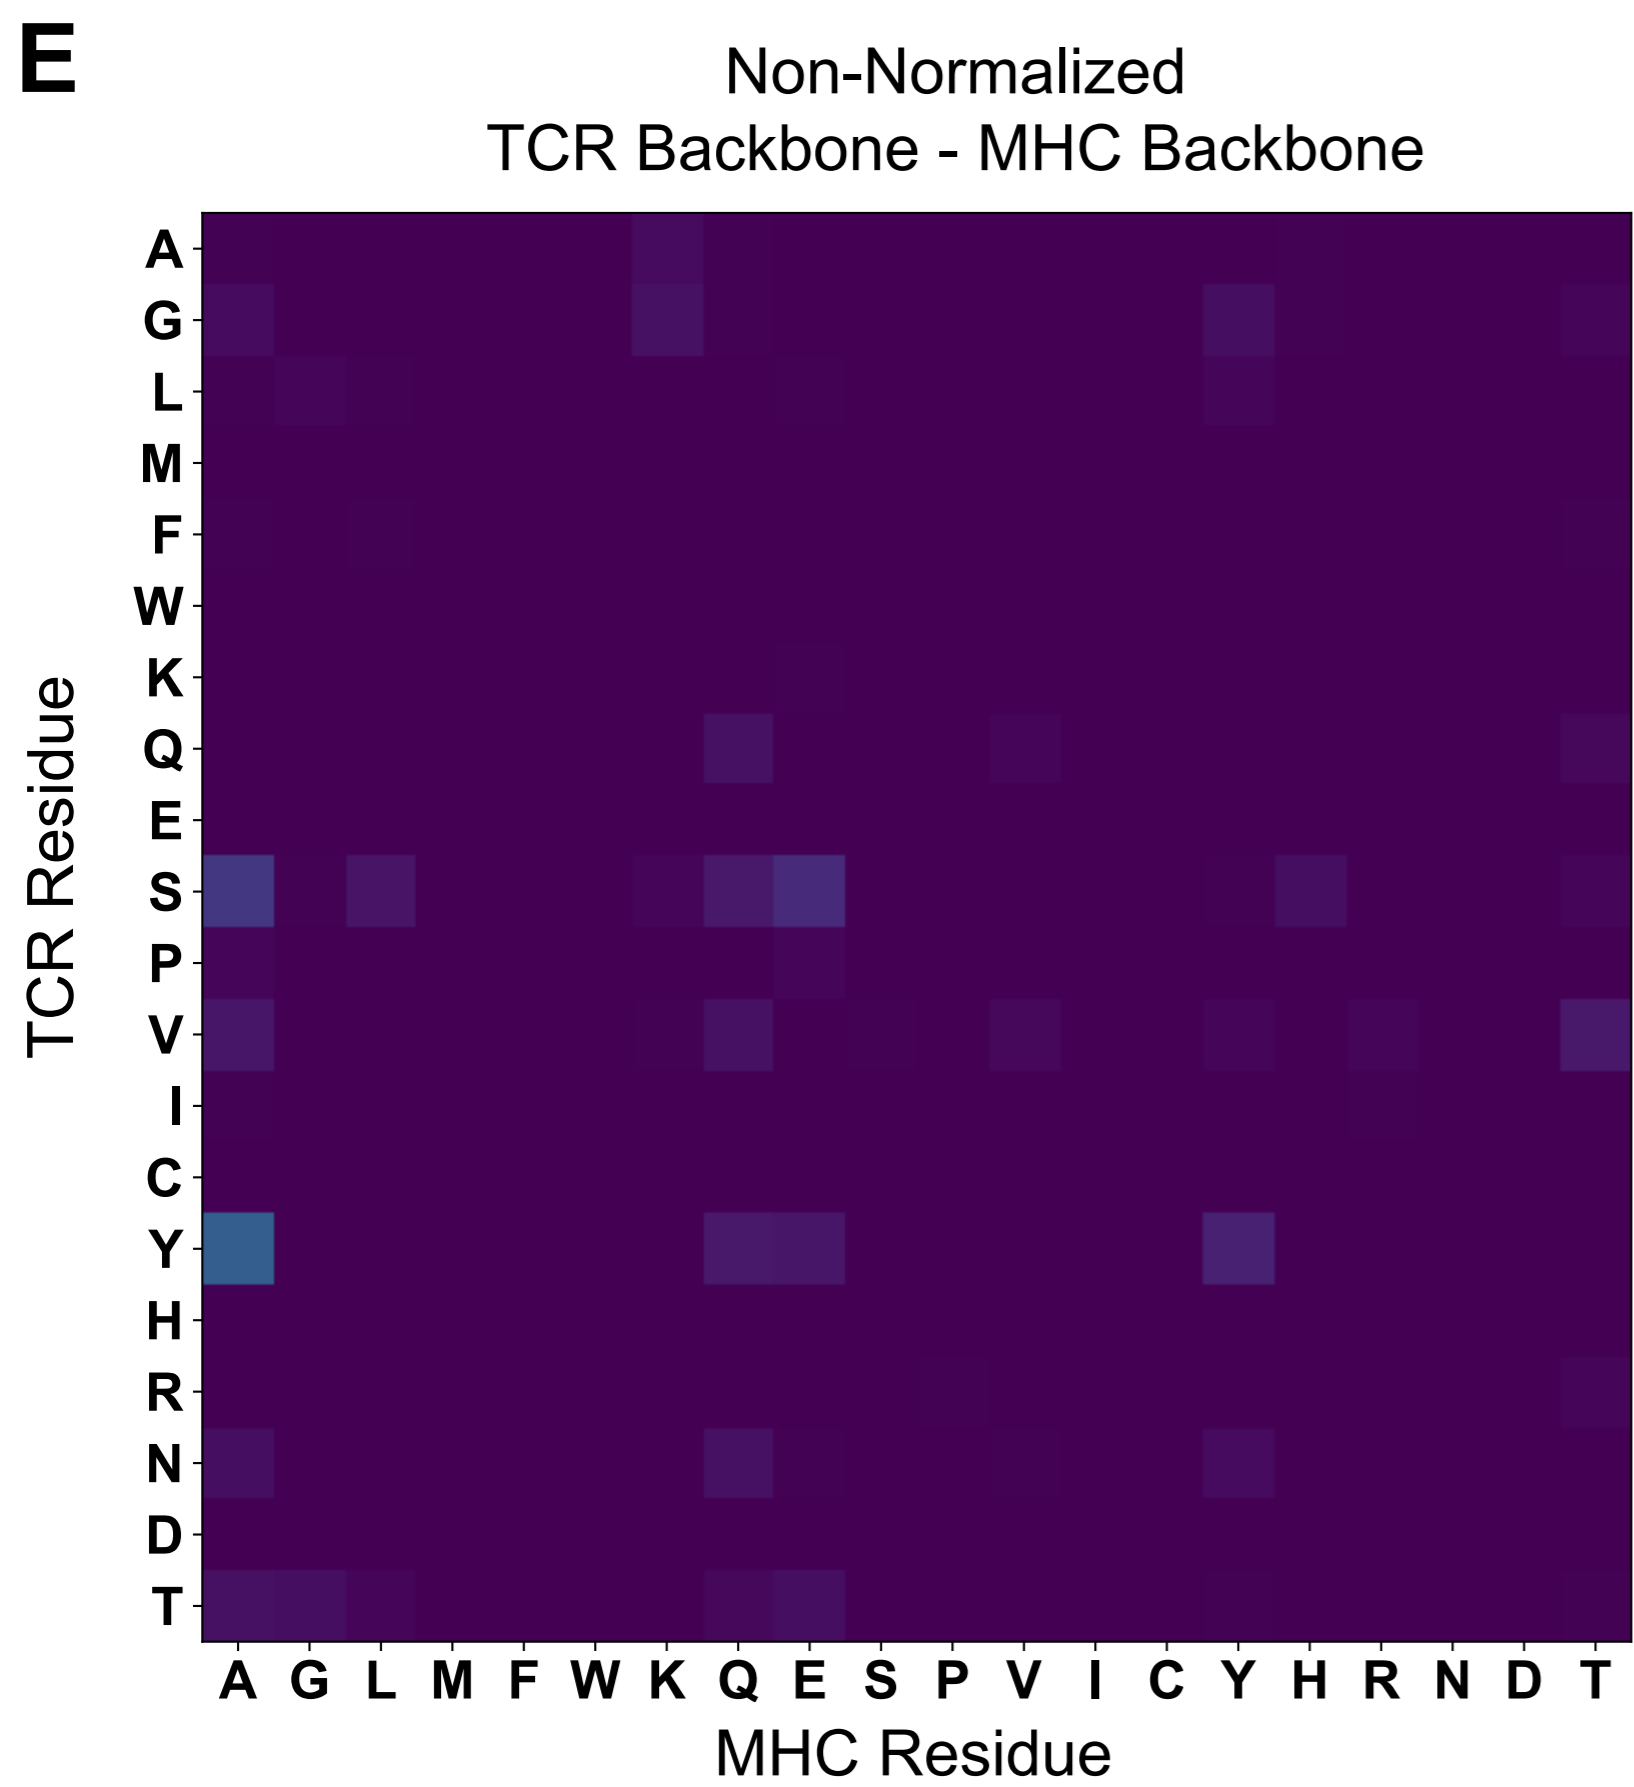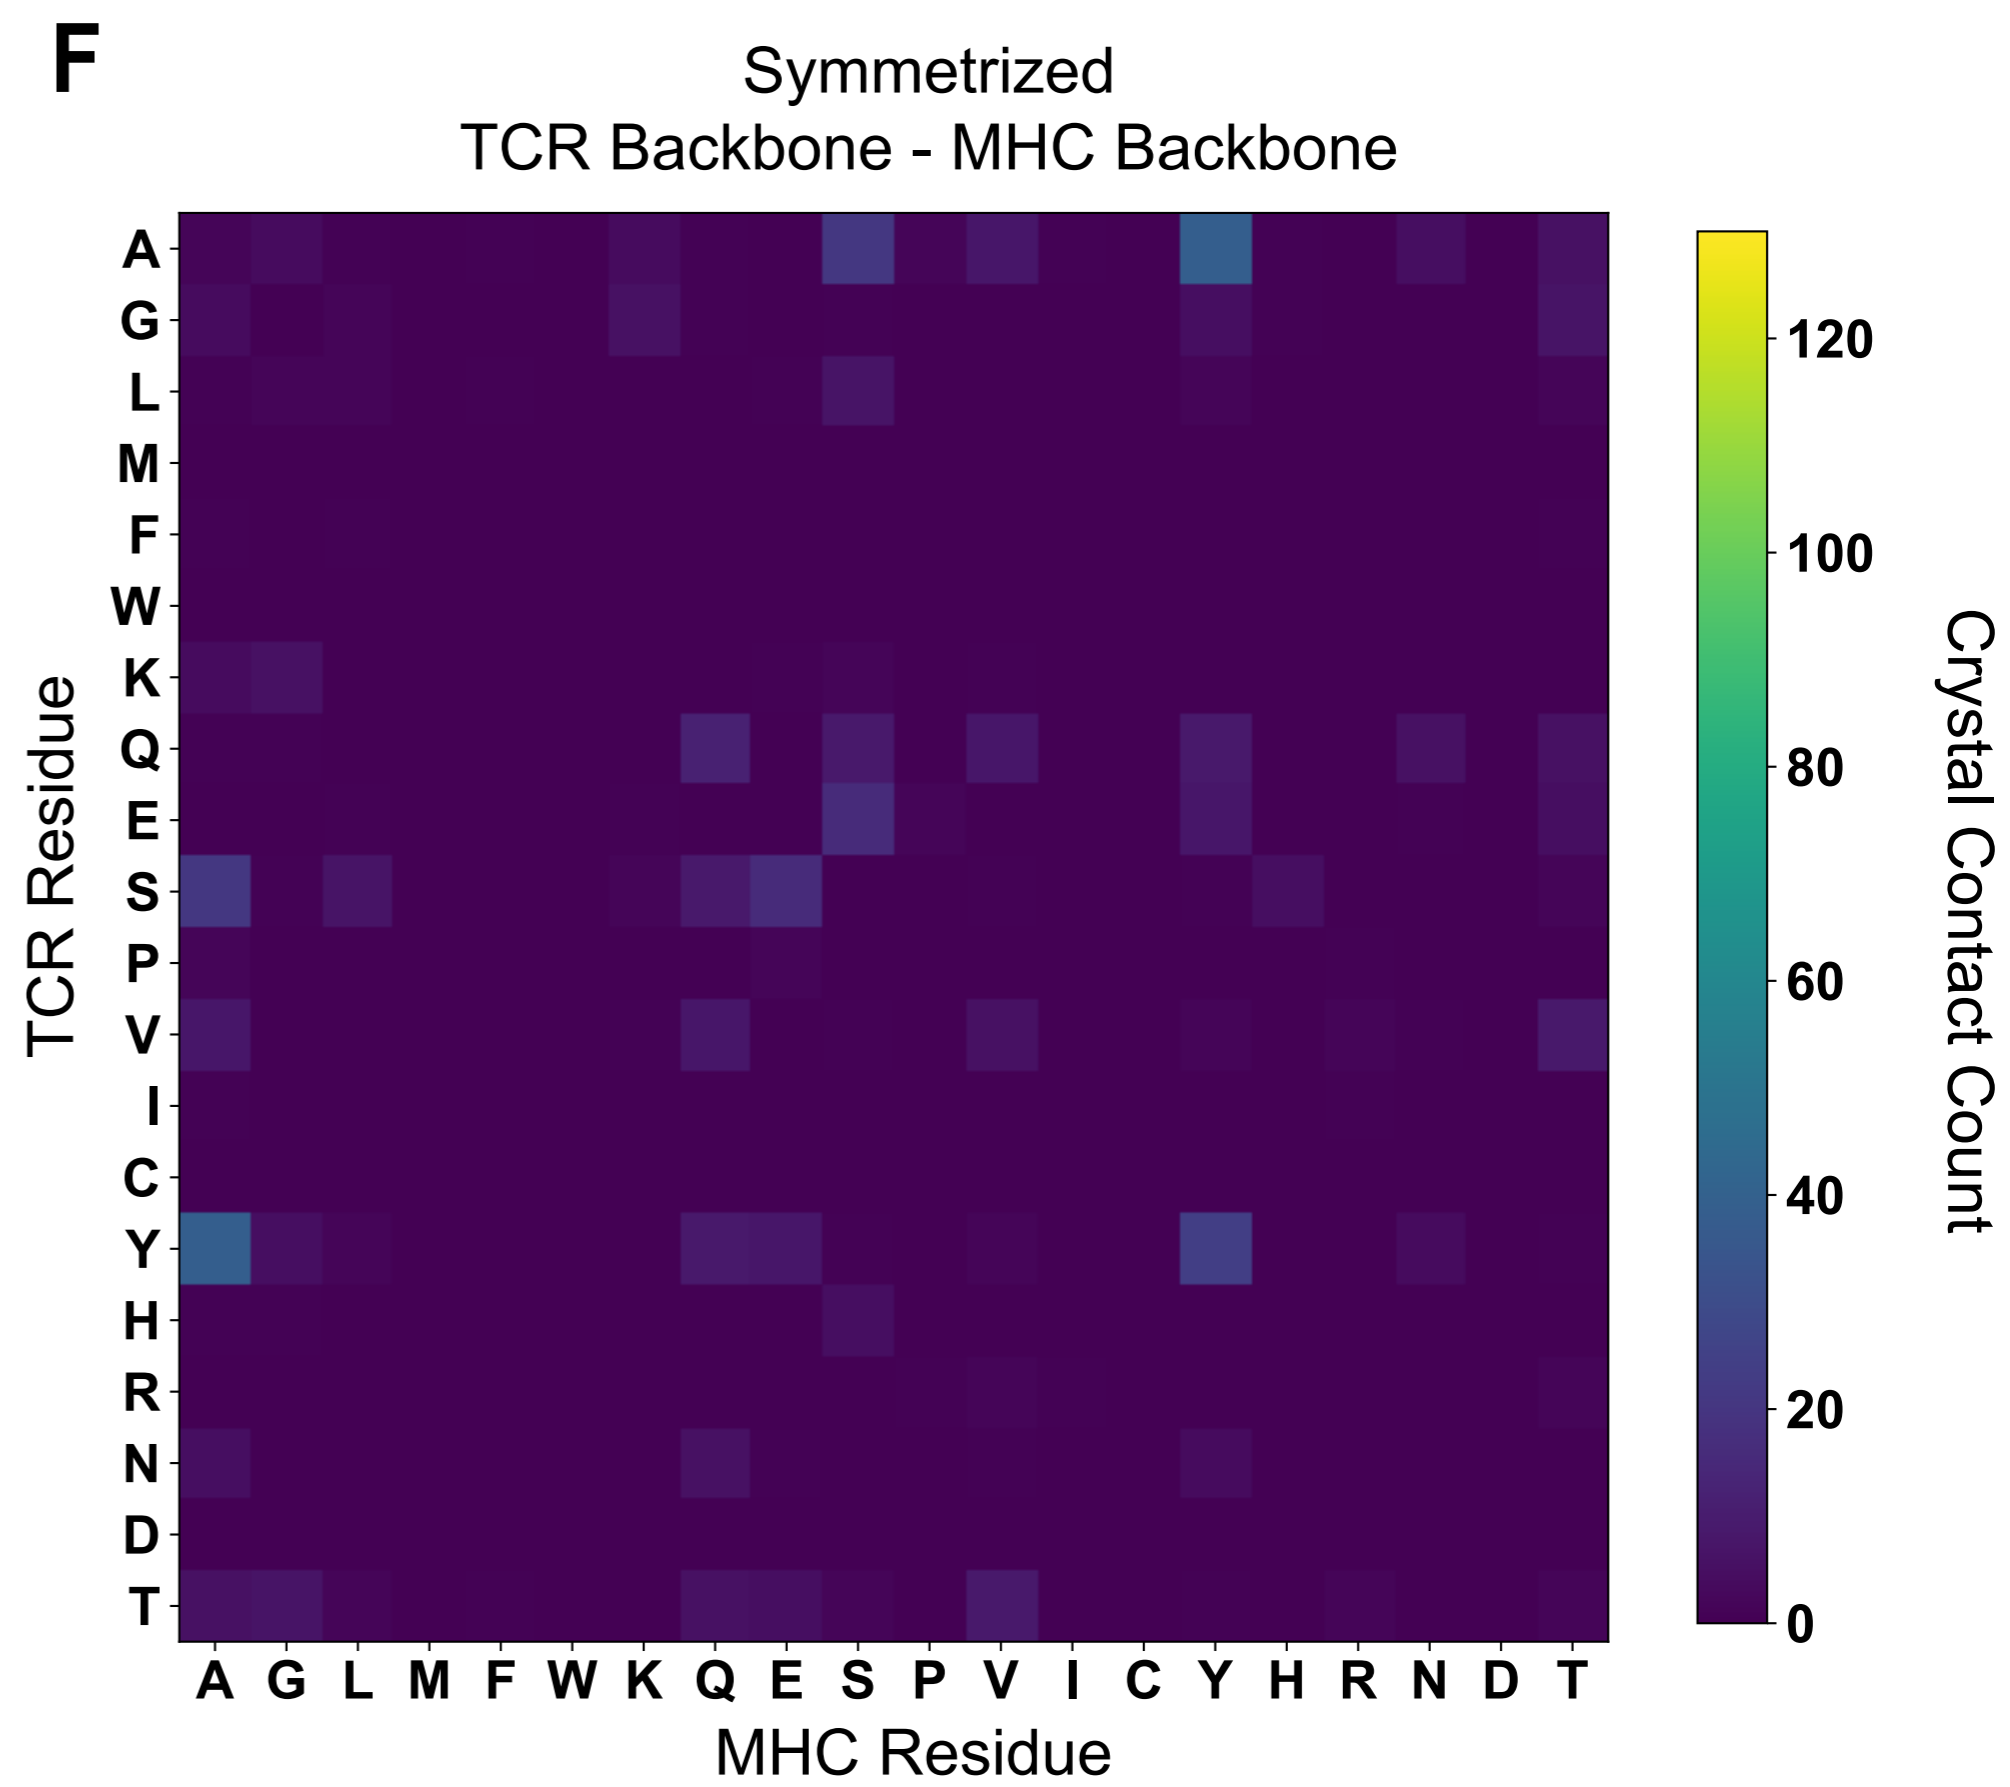

Supplement: supp [file elife-90681-supp-v1.zip]

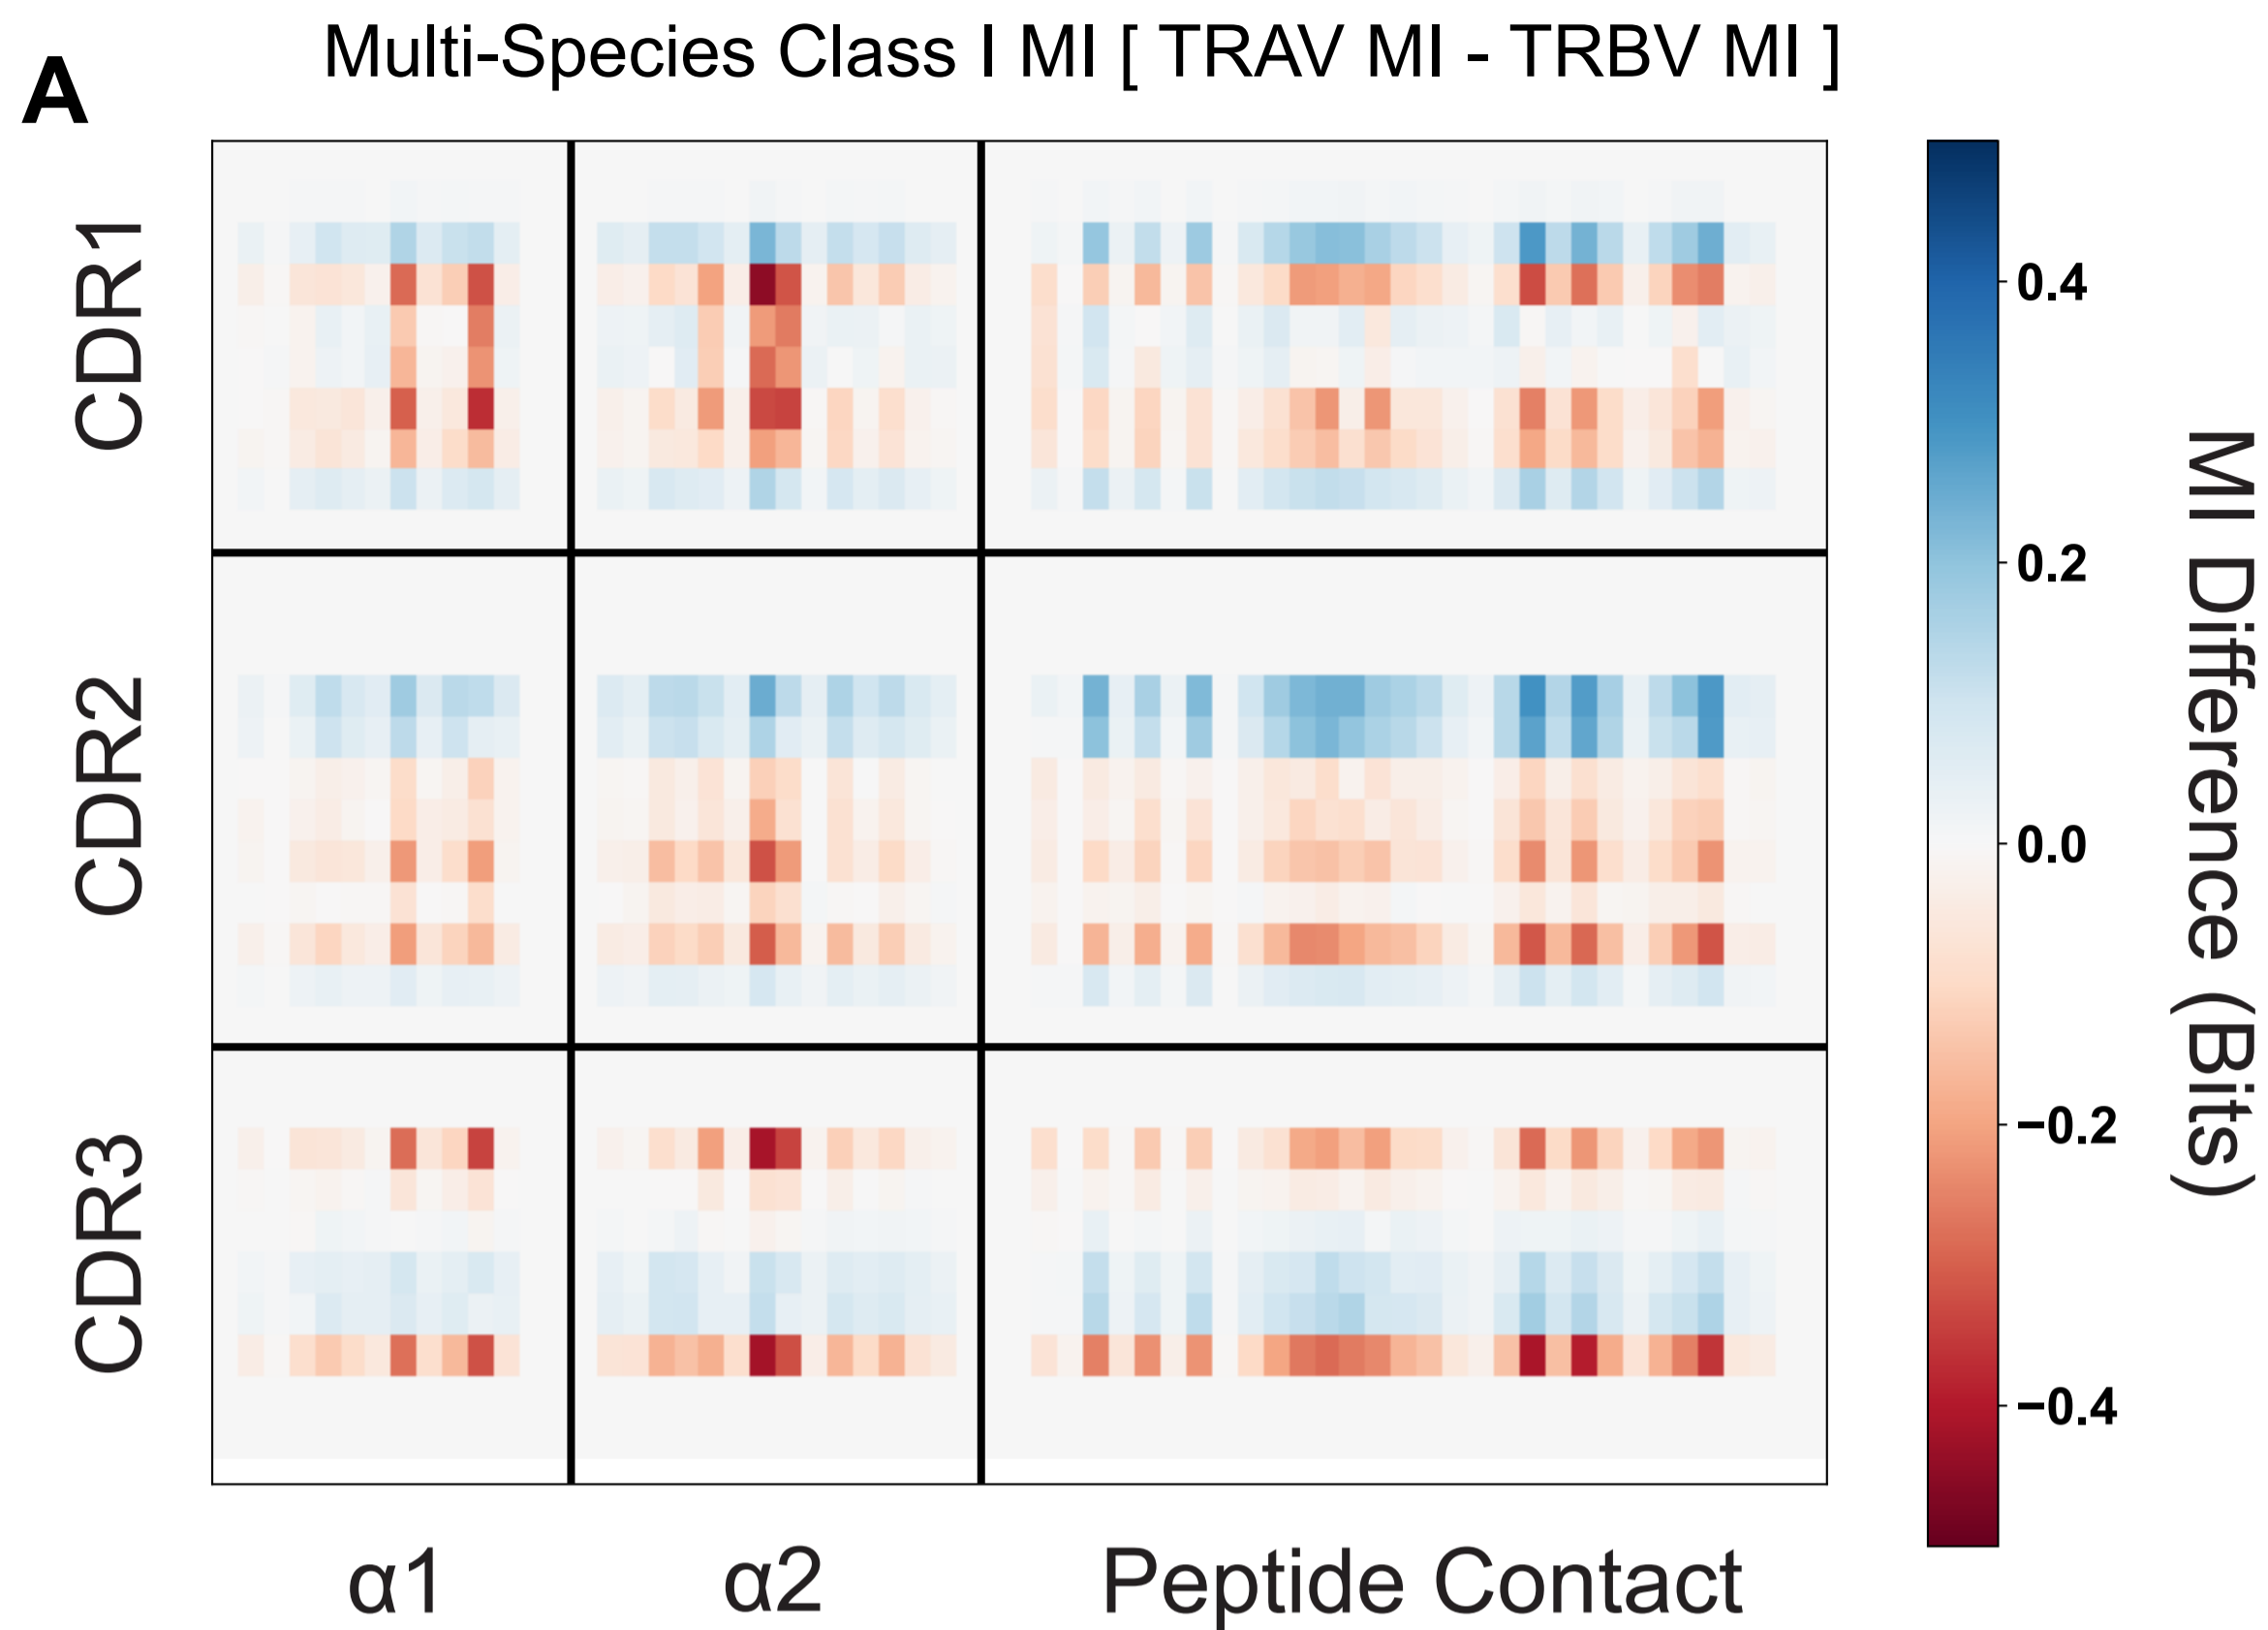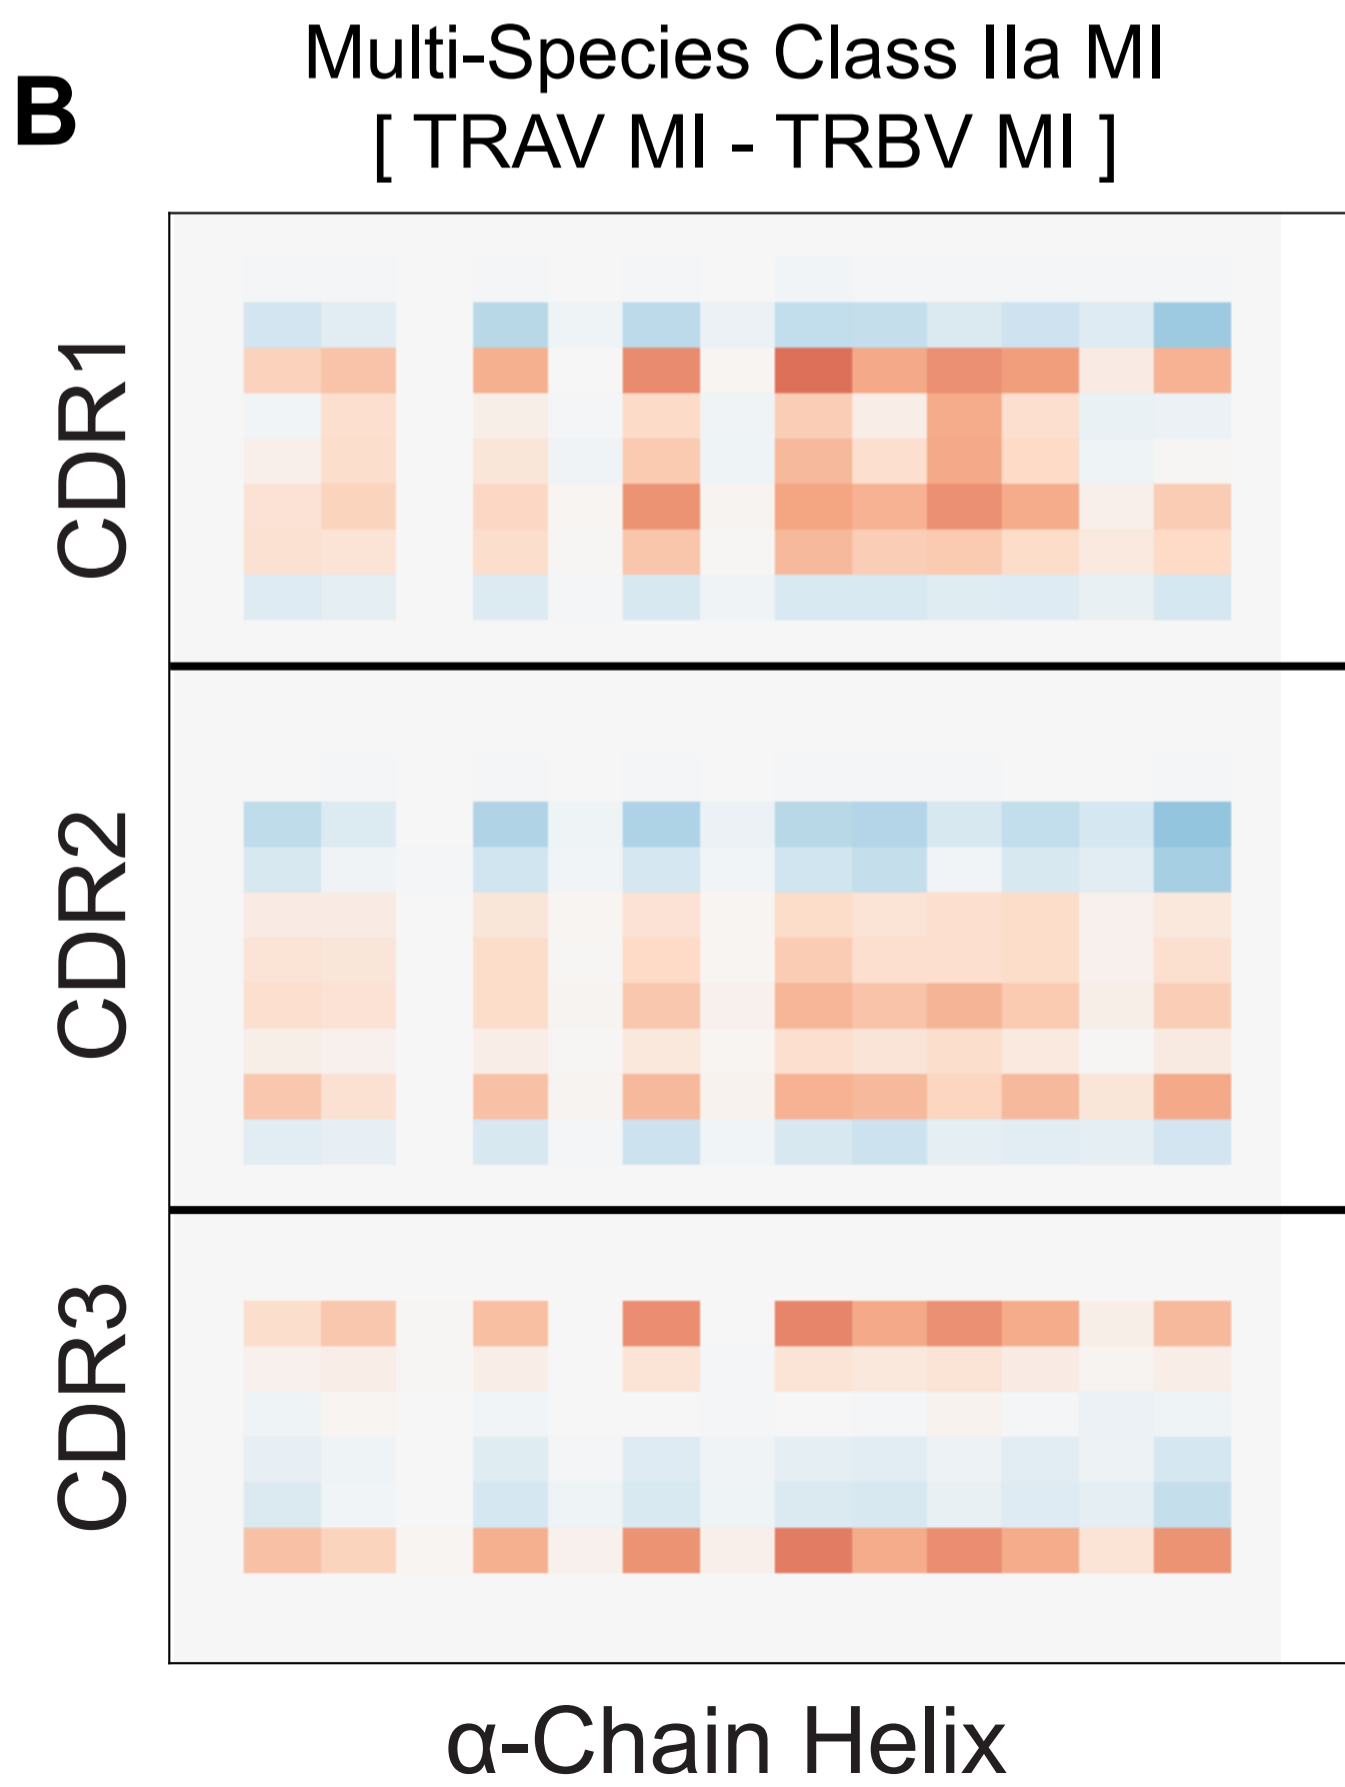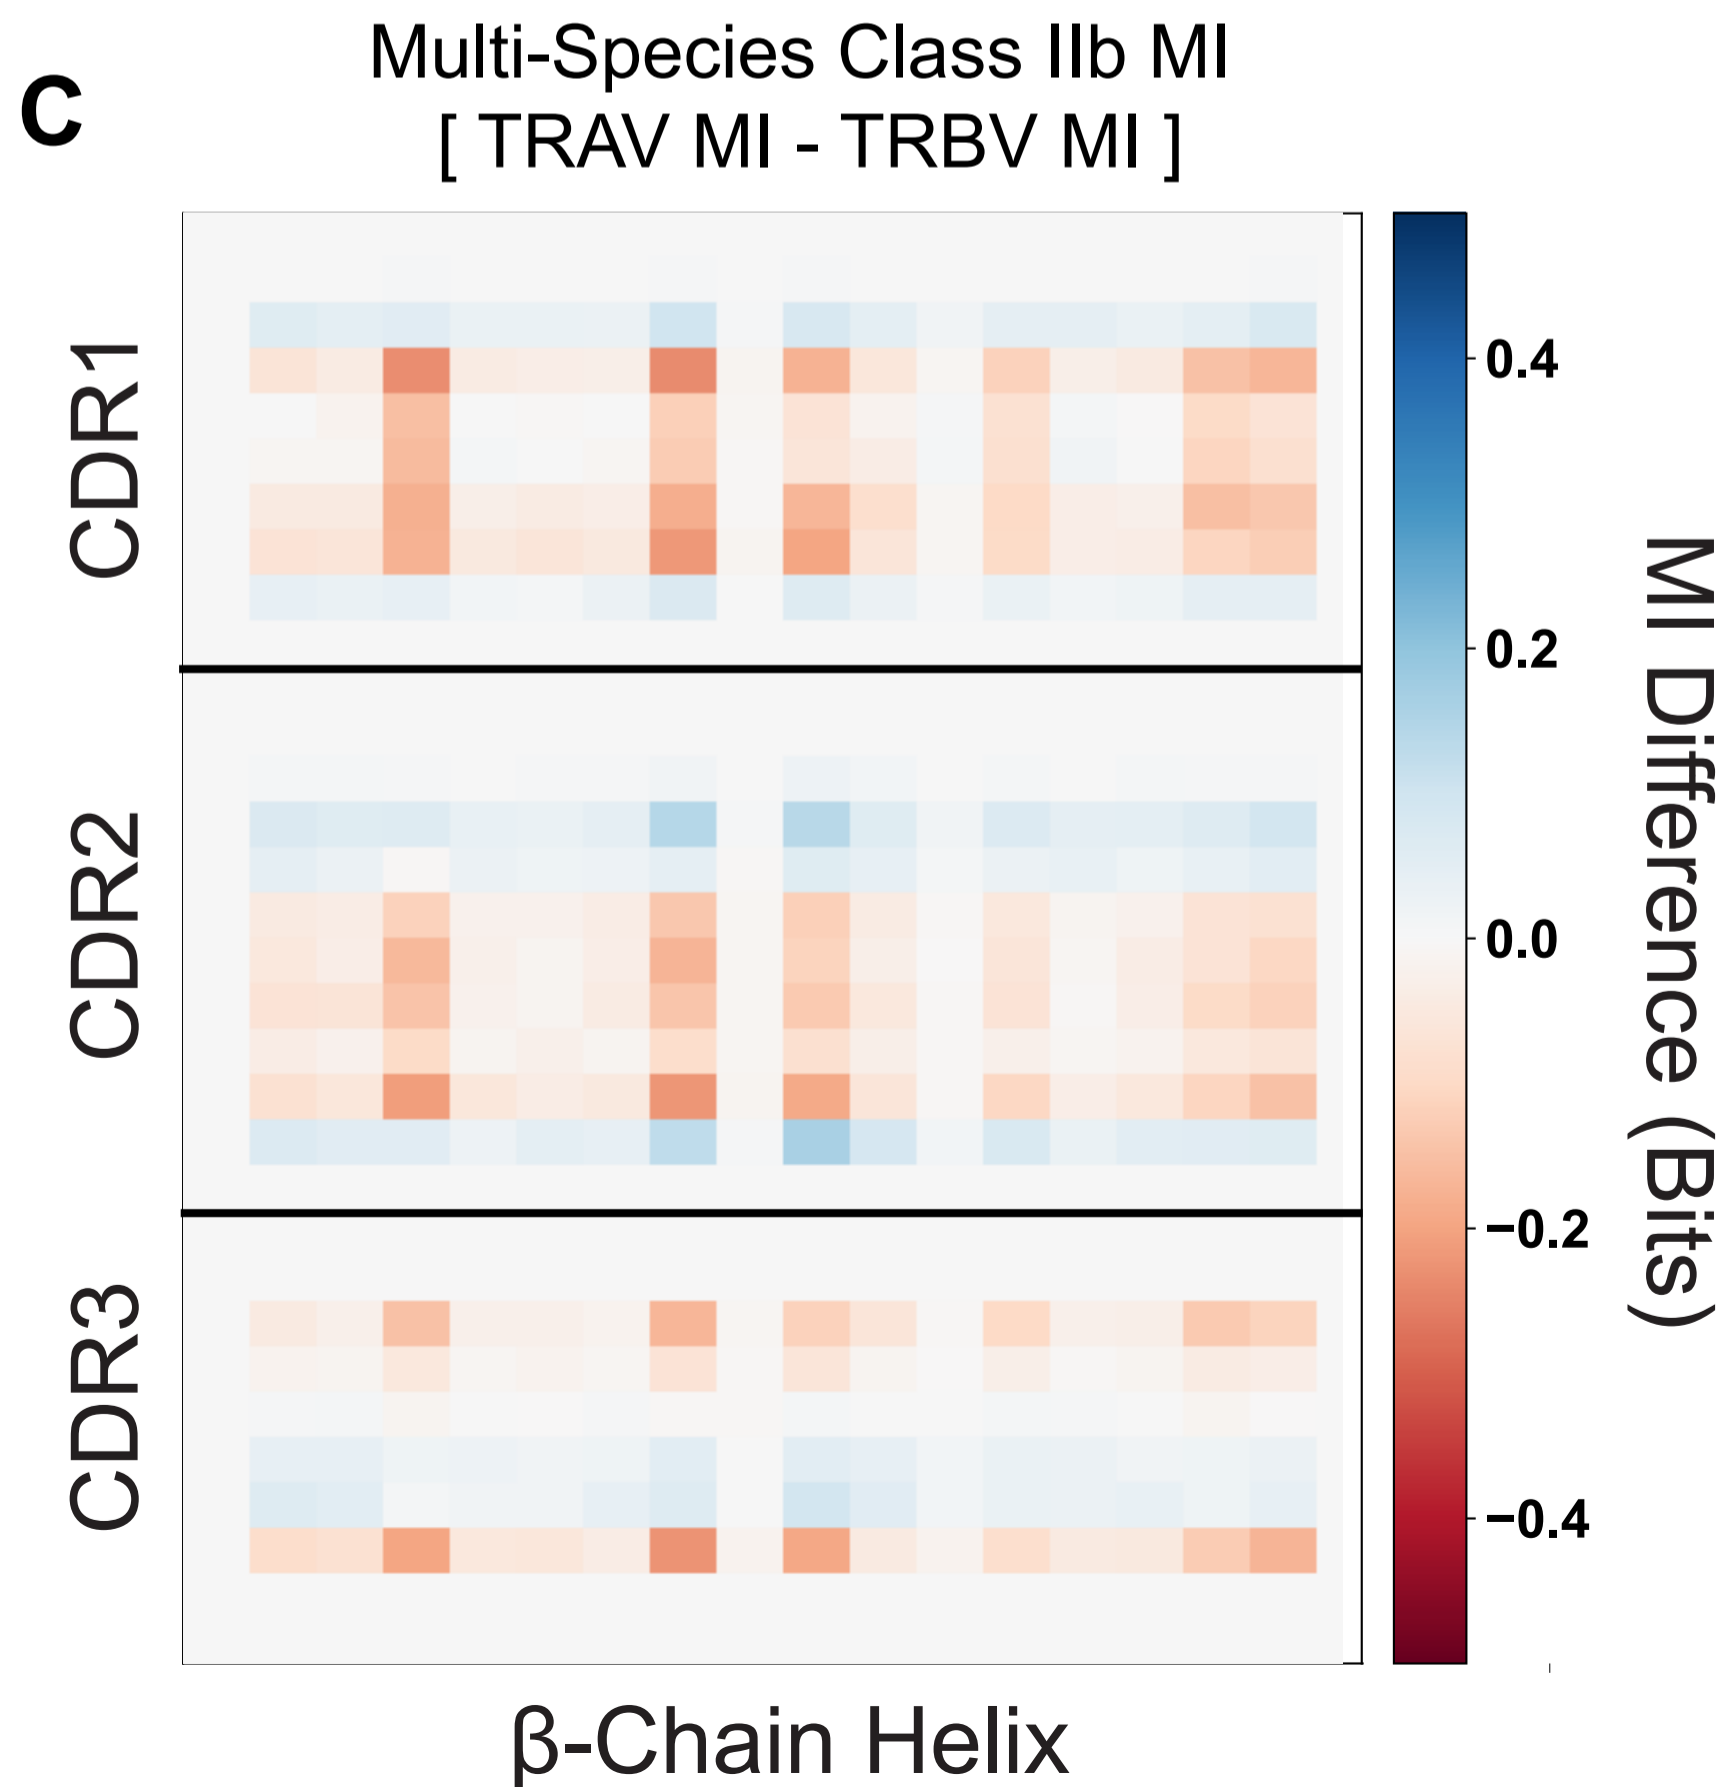

Supplement: supp [file elife-90681-supp-v1.zip]

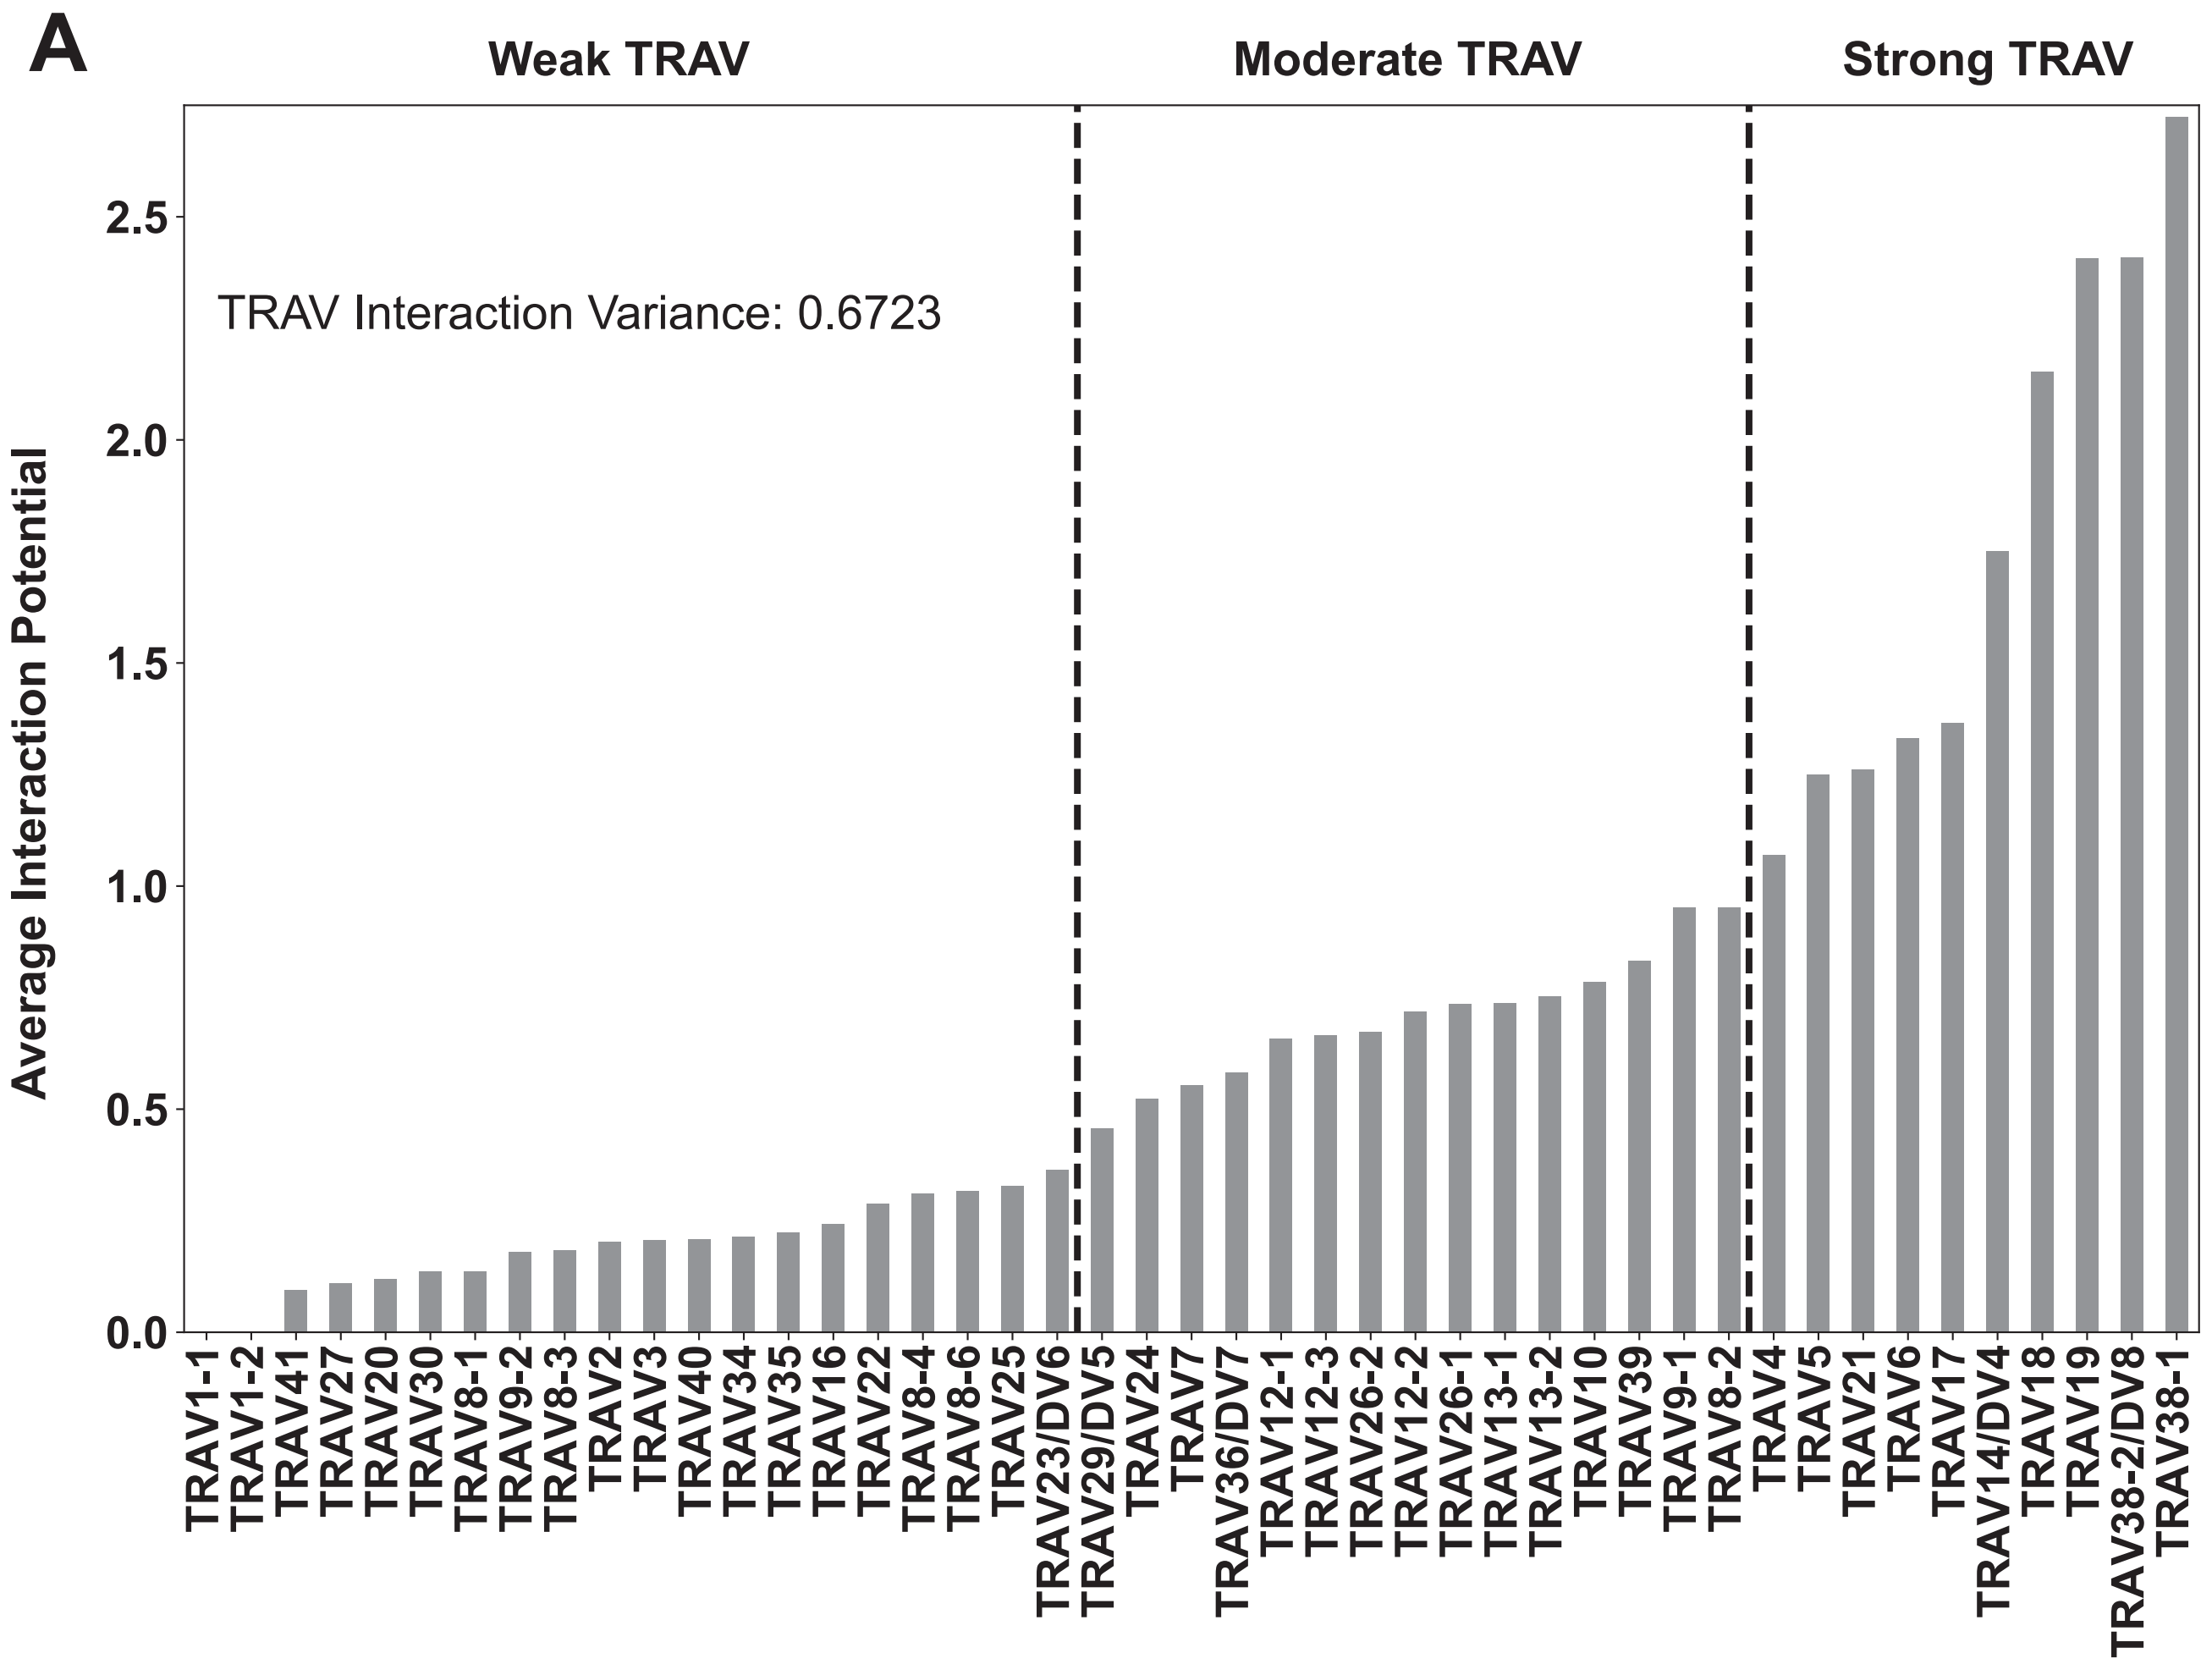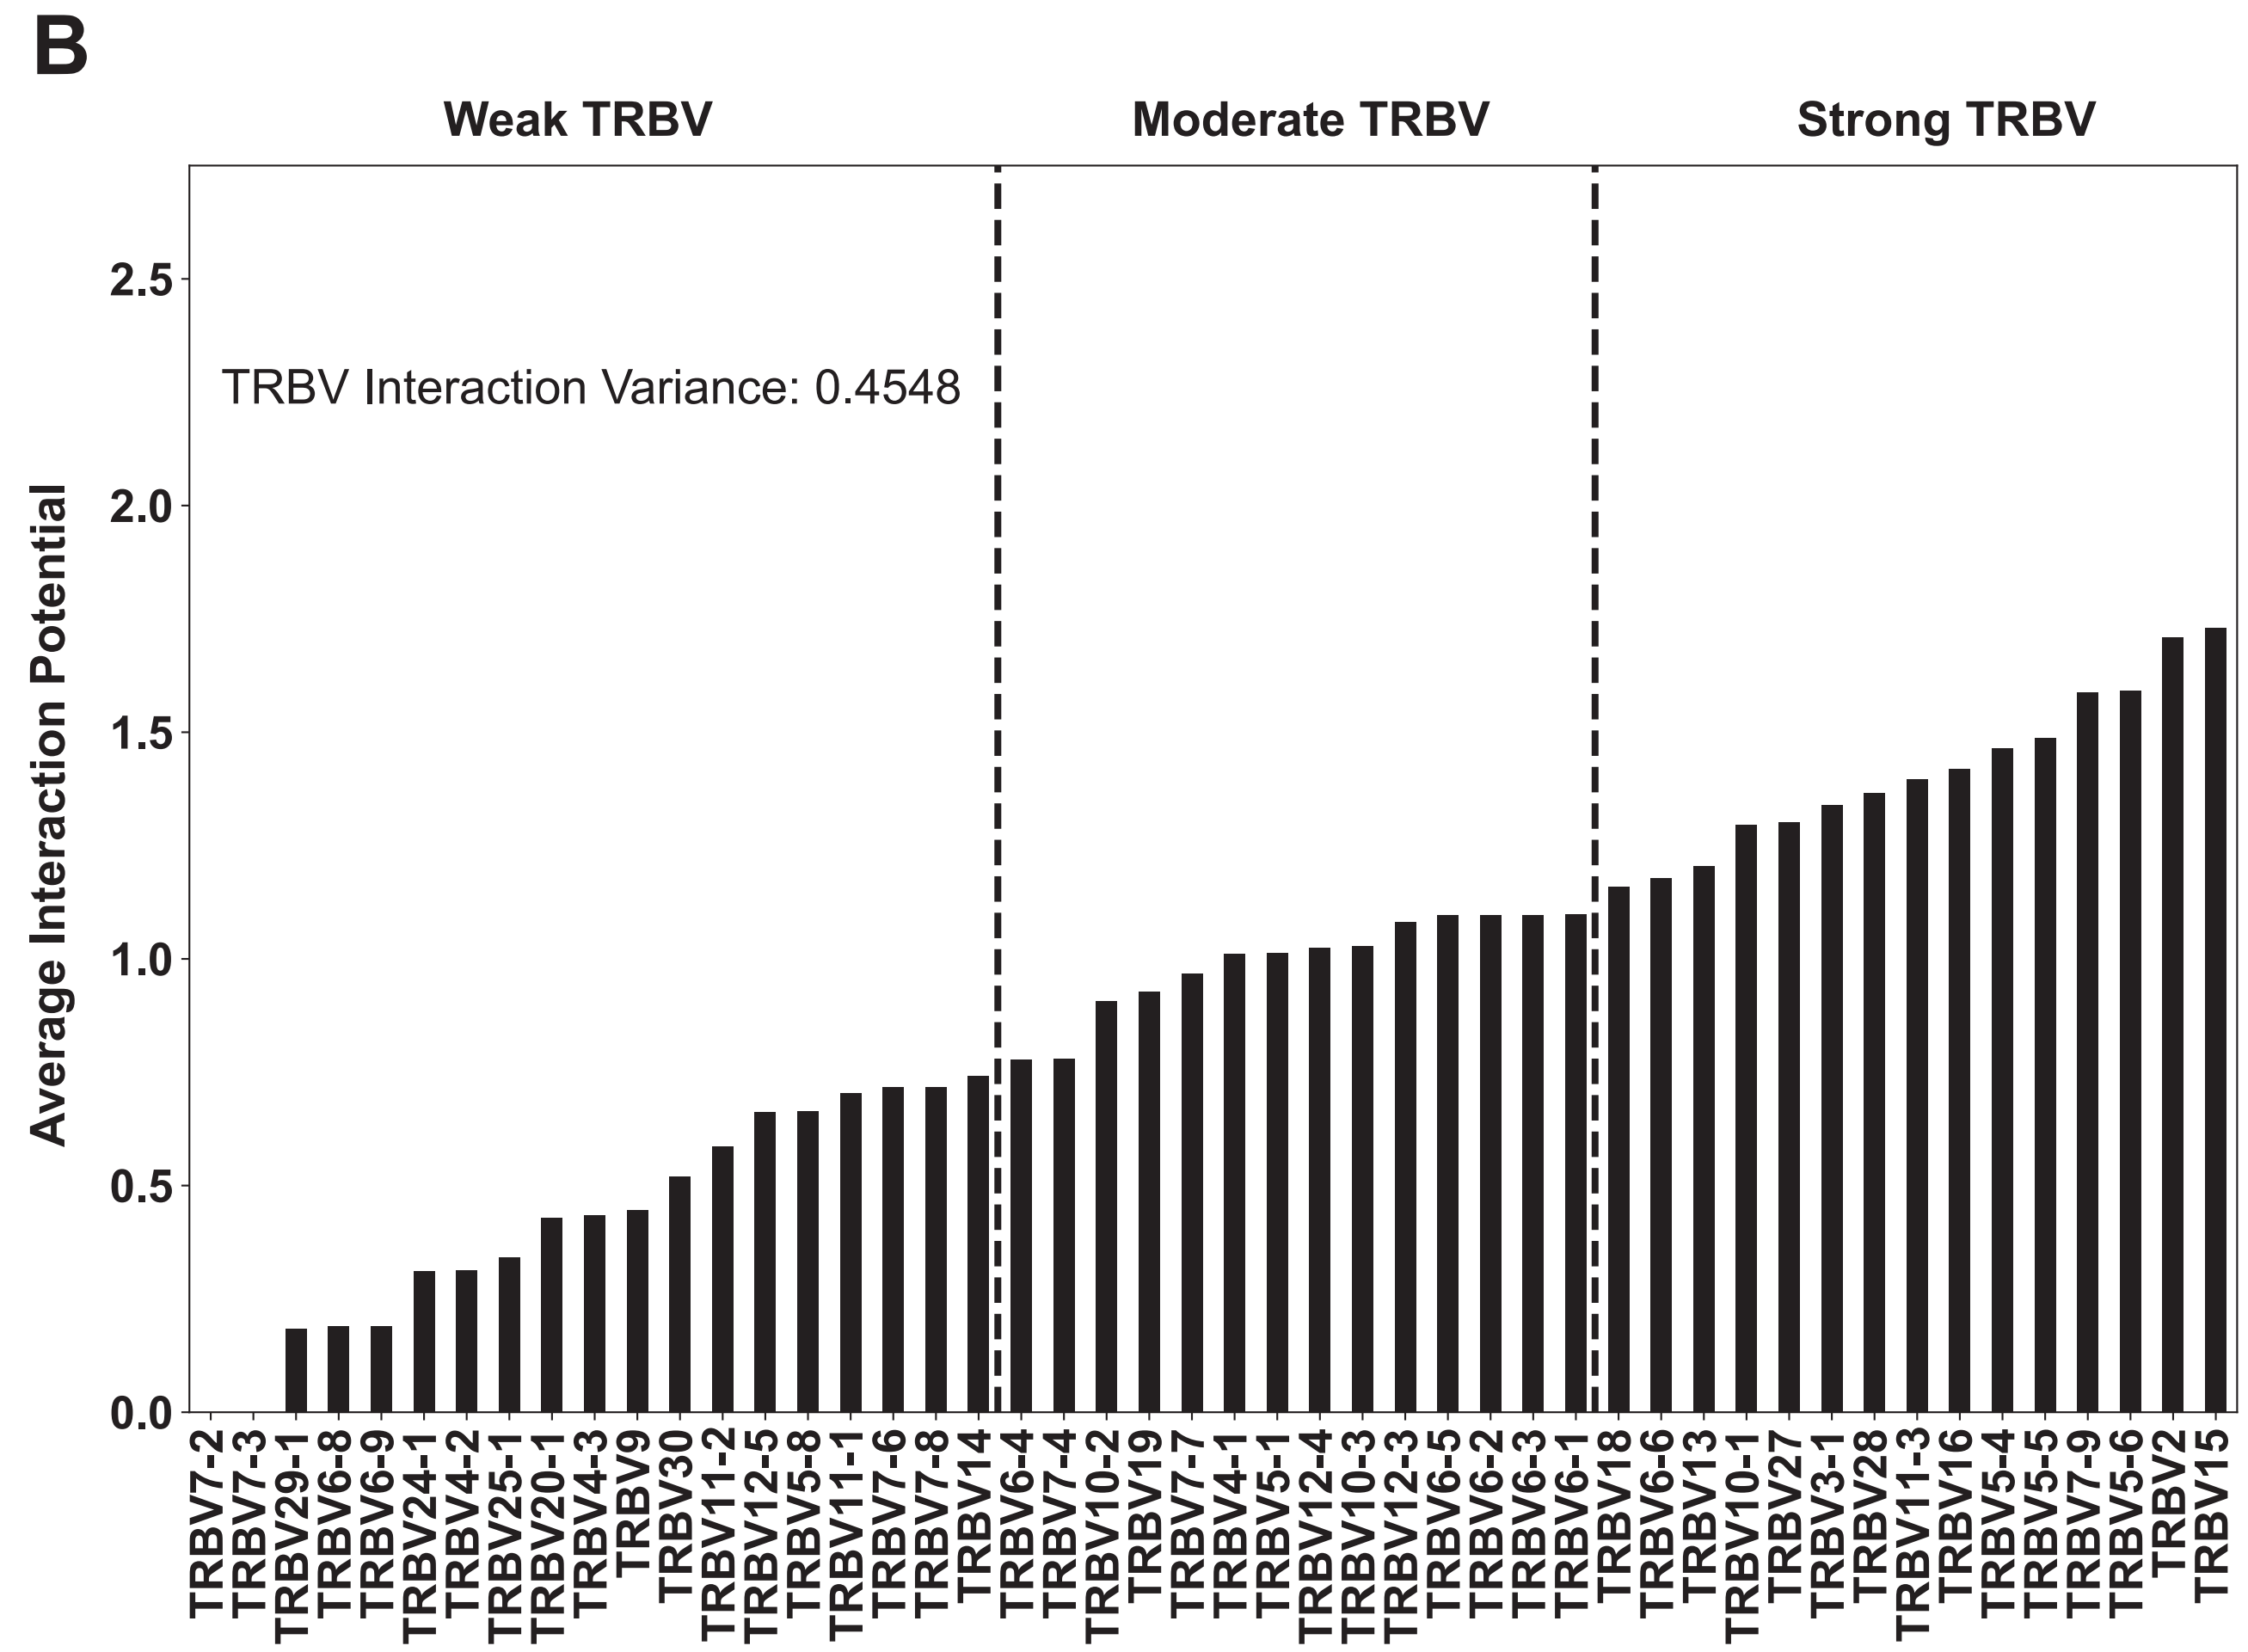

Supplement: supp [file elife-90681-supp-v1.zip]
